# Supplementary material
Source: publisher figshare collection journal article supplement (https://acs.figshare.com/ndownloader/files/22116711)
Supplement: Supplementary file 1 [file 22116711]

## Supporting Information

# Spiroconjugated Donor- $\sigma$ -Acceptor Charge-Transfer Dyes: Effect of the $\pi$ -Subsystems on the Optoelectronic Properties

Jan S. Wössner<sup>[a]</sup> and Birgit Esser<sup>\*[a]</sup>

## Table of Contents

|           |                                                          |            |
|-----------|----------------------------------------------------------|------------|
| <b>1.</b> | <b>Single-Crystal X-Ray Analysis .....</b>               | <b>S2</b>  |
| 1.1       | Growing single crystals by solvent layering.....         | S2         |
| 1.2       | Single-crystal structure and packing of <b>7</b> .....   | S3         |
| 1.3       | Single-crystal structure and packing of <b>8</b> .....   | S5         |
| 1.4       | Single-crystal structure and packing of <b>13</b> .....  | S7         |
| 1.5       | Single-crystal structure and packing of <b>14</b> .....  | S8         |
| 1.6       | Single-crystal structure and packing of <b>21</b> .....  | S9         |
| 1.7       | Single-crystal structure and packing of <b>23</b> .....  | S11        |
| 1.8       | Single-crystal structure and packing of <b>25</b> .....  | S13        |
| 1.9       | Single-crystal structure and packing of <b>26</b> .....  | S15        |
| 1.10      | Single-crystal structure and packing of <b>27</b> .....  | S17        |
| 1.11      | Single-crystal structure and packing of <b>29</b> .....  | S19        |
| 1.12      | Single-crystal structure and packing of <b>32</b> .....  | S21        |
| <b>2.</b> | <b>Cyclic Voltammograms .....</b>                        | <b>S23</b> |
| <b>3.</b> | <b>Optical Properties.....</b>                           | <b>S24</b> |
| <b>4.</b> | <b>Thermal Measurements.....</b>                         | <b>S25</b> |
| 4.1       | Thermogravimetric Analyses .....                         | S25        |
| 4.2       | Differential Scanning Calorimetry.....                   | S26        |
| <b>5.</b> | <b>DFT Calculations .....</b>                            | <b>S27</b> |
| 5.2       | TDDFT Calculations .....                                 | S30        |
| 5.3       | Total Energies and Zero-Point Vibrational Energies ..... | S37        |
| <b>6.</b> | <b>NMR-Spectra .....</b>                                 | <b>S44</b> |
| <b>7.</b> | <b>References.....</b>                                   | <b>S65</b> |

## 1. Single-Crystal X-Ray Analysis

### 1.1 Growing singles crystals by solvent layering

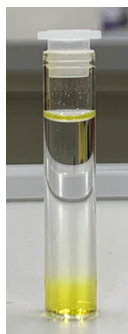

**Figure S1:** A solution of the spirocompound **7** in  $\text{CH}_2\text{Cl}_2$  was layered with *n*-hexane. The crystals were grown at 268 K.

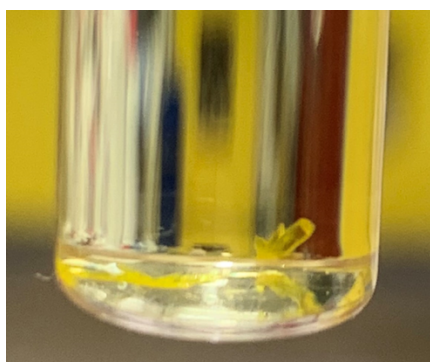

**Figure S2:** Single-crystals of **7**.

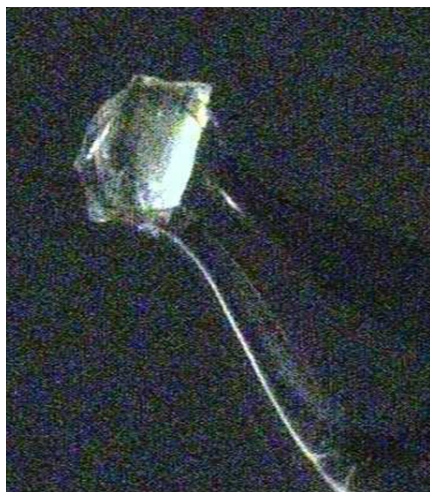

**Figure S3:** A shock-cooled single-crystal of **7** mounted on a holder in perfluoroether oil.

## 1.2 Single-crystal structure and packing of **7**

### Crystal Data and Experimental

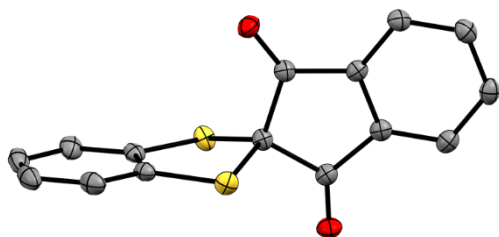

(displacement ellipsoids are shown at 50% probability;  
hydrogen atoms are omitted for clarity)

**Experimental.** Single yellow block-shaped crystals of **7** were recrystallised from a mixture of  $\text{CHCl}_3$  and methanol by solvent layering. A suitable crystal  $0.45 \times 0.30 \times 0.10 \text{ mm}^3$  was selected and mounted on a MITIGEN holder in perfluoroether oil on an Bruker SMART APEX2 area detector diffractometer. The crystal was kept at a steady  $T = 100(2) \text{ K}$  during data collection. The structure was solved with the **ShelXT** (Sheldrick, 2015) structure solution program using the Intrinsic Phasing solution method and by using **Olex2** (Dolomanov et al., 2009) as the graphical interface. The model was refined with version 2018/3 of **ShelXL** (Sheldrick, 2015) using Least Squares minimisation.

**Crystal Data.**  $\text{C}_{15}\text{H}_8\text{O}_2\text{S}_2$ ,  $M_r = 284.33$ , monoclinic,  $P2_1/n$  (No. 14),  $a = 9.424(9) \text{ \AA}$ ,  $b = 9.680(9) \text{ \AA}$ ,  $c = 13.829(10) \text{ \AA}$ ,  $\beta = 94.214(6)^\circ$ ,  $\alpha = \gamma = 90^\circ$ ,  $V = 1258.2(18) \text{ \AA}^3$ ,  $T = 100(2) \text{ K}$ ,  $Z = 4$ ,  $Z' = 1$ ,  $\mu(\text{MoK}\alpha) = 0.415$ , 22528 reflections measured, 2875 unique ( $R_{\text{int}} = 0.0422$ ) which were used in all calculations. The final  $wR_2$  was 0.0947 (all data) and  $R_1$  was 0.0339 ( $I > 2(I)$ ).

| Compound                              | <b>7</b>                                      |
|---------------------------------------|-----------------------------------------------|
| CCDC                                  | 1859605                                       |
| Formula                               | $\text{C}_{15}\text{H}_8\text{O}_2\text{S}_2$ |
| $D_{\text{calc.}} / \text{g cm}^{-3}$ | 1.501                                         |
| $\mu / \text{mm}^{-1}$                | 0.415                                         |
| Formula Weight                        | 284.33                                        |
| Colour                                | yellow                                        |
| Shape                                 | block                                         |
| Size/ $\text{mm}^3$                   | $0.45 \times 0.30 \times 0.10$                |
| $T / \text{K}$                        | 100(2)                                        |
| Crystal System                        | monoclinic                                    |
| Space Group                           | $P2_1/n$                                      |
| $a / \text{\AA}$                      | 9.424(9)                                      |
| $b / \text{\AA}$                      | 9.680(9)                                      |
| $c / \text{\AA}$                      | 13.829(10)                                    |
| $\alpha / ^\circ$                     | 90                                            |
| $\beta / ^\circ$                      | 94.214(6)                                     |
| $\gamma / ^\circ$                     | 90                                            |
| $V / \text{\AA}^3$                    | 1258.2(18)                                    |
| $Z$                                   | 4                                             |
| $Z'$                                  | 1                                             |
| Wavelength/ $\text{\AA}$              | 0.710730                                      |
| Radiation type                        | $\text{MoK}\alpha$                            |
| $\theta_{\text{min}} / ^\circ$        | 2.531                                         |
| $\theta_{\text{max}} / ^\circ$        | 27.481                                        |
| Measured Refl.                        | 22528                                         |
| Independent Refl.                     | 2875                                          |
| Reflections with $I > 2(I)$           | 2621                                          |
| $R_{\text{int}}$                      | 0.0422                                        |
| Parameters                            | 172                                           |
| Restraints                            | 0                                             |
| Largest Peak                          | 0.470                                         |
| Deepest Hole                          | -0.289                                        |
| GooF                                  | 1.064                                         |
| $wR_2$ (all data)                     | 0.0947                                        |
| $wR_2$                                | 0.0919                                        |
| $R_1$ (all data)                      | 0.0371                                        |
| $R_1$                                 | 0.0339                                        |

A yellow block-shaped crystal with dimensions 0.45×0.30×0.10 mm<sup>3</sup> was mounted on a MITIGEN holder in perfluoroether oil. Data were collected using an Bruker SMART APEX2 area detector diffractometer equipped with an Oxford Cryosystems 800 low-temperature device operating at  $T = 100(2)$  K.

Data were measured using  $\omega$  and  $\phi$  scans using MoK $\alpha$  radiation. The total number of runs and images was based on the strategy calculation from the program **APEX2** (Bruker) The maximum resolution that was achieved was  $\Theta = 27.481^\circ$  (0.77 Å).

The diffraction pattern was indexed The total number of runs and images was based on the strategy calculation from the program **APEX2** (Bruker) and the unit cell was refined using **SAINT** (Bruker, V8.38A, after 2013) on 9978 reflections, 44% of the observed reflections.

Data reduction, scaling and absorption corrections were performed using **SAINT** (Bruker, V8.38A, after 2013). The final completeness is 100.00 % out to 27.481° in  $\Theta$ . A multi-scan absorption correction was performed using **SADABS-2016/2** (Bruker,2016/2) was used for absorption correction.  $wR_2(\text{int})$  was 0.1360 before and 0.0558 after correction. The Ratio of minimum to maximum transmission is 0.7882. The  $\lambda/2$  correction factor is Not present. The absorption coefficient  $\mu$  of this material is 0.415 mm<sup>-1</sup> at this wavelength ( $\lambda = 0.711$  Å) and the minimum and maximum transmissions are 0.588 and 0.746.

The structure was solved and the space group  $P2_1/n$  (# 14) determined by the **ShelXT** (Sheldrick, 2015) structure solution program using Intrinsic Phasing and refined by Least Squares using version 2018/3 of **ShelXL** (Sheldrick, 2015). All non-hydrogen atoms were refined anisotropically. Hydrogen atom positions were calculated geometrically and refined using the riding model. Hydrogen atom positions were calculated geometrically and refined using the riding model.

*\_exptl\_absorpt\_process\_details:* **SADABS-2016/2** (Bruker,2016/2) was used for absorption correction.  $wR_2(\text{int})$  was 0.1360 before and 0.0558 after correction. The Ratio of minimum to maximum transmission is 0.7882. The  $\lambda/2$  correction factor is Not present.

There is a single molecule in the asymmetric unit, which is represented by the reported sum formula. In other words: Z is 4 and Z' is 1.



### 1.3 Single-crystal structure and packing of **8**

#### Crystal Data and Experimental

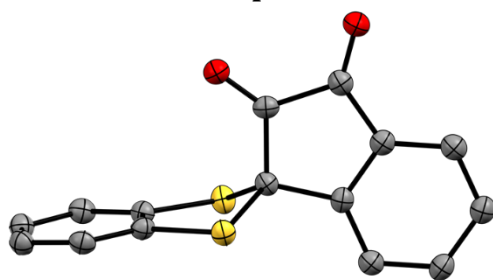

(displacement ellipsoids are shown at 50% probability;  
hydrogen atoms are omitted for clarity)

**Experimental.** Single brown block-shaped crystals of **8** were recrystallised from a mixture of CH<sub>2</sub>Cl<sub>2</sub> and cyclohexane by solvent layering. A suitable crystal 0.31×0.23×0.20 mm<sup>3</sup> was selected and mounted on a MITIGEN holder in perfluoroether oil on an Rigaku Spider diffractometer. The crystal was kept at a steady *T* = 100 K during data collection. The structure was solved with the **ShelXT** (Sheldrick, 2015) structure solution program using the Intrinsic Phasing solution method and by using **Olex2** (Dolomanov et al., 2009) as the graphical interface. The model was refined with version 2018/3 of **ShelXL** (Sheldrick, 2015) using Least Squares minimisation.

**Crystal Data.** C<sub>15</sub>H<sub>8</sub>O<sub>2</sub>S<sub>2</sub>, *M<sub>r</sub>* = 284.33, orthorhombic, *Pnma* (No. 62), *a* = 15.3775(11) Å, *b* = 7.2583(6) Å, *c* = 11.0501(9) Å,  $\alpha = \beta = \gamma = 90^\circ$ , *V* = 1233.35(17) Å<sup>3</sup>, *T* = 100 K, *Z* = 4, *Z'* = 0.5,  $\mu(\text{MoK}\alpha) = 0.424$ , 15119 reflections measured, 1525 unique (*R<sub>int</sub>* = 0.0610) which were used in all calculations. The final *wR<sub>2</sub>* was 0.1243 (all data) and *R<sub>1</sub>* was 0.0475 (*I* > 2(*I*)).

| Compound                                      | <b>8</b>                                                     |
|-----------------------------------------------|--------------------------------------------------------------|
| CCDC                                          | 1874678                                                      |
| Formula                                       | C <sub>15</sub> H <sub>8</sub> O <sub>2</sub> S <sub>2</sub> |
| <i>D<sub>calc.</sub></i> / g cm <sup>-3</sup> | 1.531                                                        |
| $\mu$ /mm <sup>-1</sup>                       | 0.424                                                        |
| Formula Weight                                | 284.33                                                       |
| Colour                                        | brown                                                        |
| Shape                                         | block                                                        |
| Size/mm <sup>3</sup>                          | 0.31×0.23×0.20                                               |
| <i>T</i> /K                                   | 100                                                          |
| Crystal System                                | orthorhombic                                                 |
| Space Group                                   | <i>Pnma</i>                                                  |
| <i>a</i> /Å                                   | 15.3775(11)                                                  |
| <i>b</i> /Å                                   | 7.2583(6)                                                    |
| <i>c</i> /Å                                   | 11.0501(9)                                                   |
| $\alpha/^\circ$                               | 90                                                           |
| $\beta/^\circ$                                | 90                                                           |
| $\gamma/^\circ$                               | 90                                                           |
| <i>V</i> /Å <sup>3</sup>                      | 1233.35(17)                                                  |
| <i>Z</i>                                      | 4                                                            |
| <i>Z'</i>                                     | 0.5                                                          |
| Wavelength/Å                                  | 0.71073                                                      |
| Radiation type                                | MoK $\alpha$                                                 |
| $\theta_{\text{min}}/^\circ$                  | 3.228                                                        |
| $\theta_{\text{max}}/^\circ$                  | 27.474                                                       |
| Measured Refl.                                | 15119                                                        |
| Independent Refl.                             | 1525                                                         |
| Reflections with <i>I</i> > 2( <i>I</i> )     | 1375                                                         |
| <i>R<sub>int</sub></i>                        | 0.0610                                                       |
| Parameters                                    | 103                                                          |
| Restraints                                    | 0                                                            |
| Largest Peak                                  | 0.489                                                        |
| Deepest Hole                                  | -0.393                                                       |
| GooF                                          | 1.131                                                        |
| <i>wR<sub>2</sub></i> (all data)              | 0.1243                                                       |
| <i>wR<sub>2</sub></i>                         | 0.1193                                                       |
| <i>R<sub>1</sub></i> (all data)               | 0.0560                                                       |
| <i>R<sub>1</sub></i>                          | 0.0475                                                       |

A brown block-shaped crystal with dimensions 0.31×0.23×0.20 mm<sup>3</sup> was mounted on a MITIGEN holder in perfluoroether oil. Data were collected using an Rigaku Spider diffractometer equipped with an Oxford Cryosystems 800 low-temperature device operating at  $T = 100$  K.

Data were measured using  $\omega$  and  $\phi$  scans using MoK $\alpha$  radiation. The maximum resolution that was achieved was  $\Theta = 27.474^\circ$  (0.77 Å).

The diffraction pattern was indexed and the unit cell was refined on 1088 reflections, 7% of the observed reflections.

Data reduction, scaling and absorption corrections were performed. The final completeness is 99.80 % out to  $27.474^\circ$  in  $\Theta$ . A empirical absorption correction was performed using Empirical Absorption Correction March 2001 T Higashi. The absorption coefficient  $\mu$  of this material is 0.424 mm<sup>-1</sup> at this wavelength ( $\lambda = 0.711$  Å) and the minimum and maximum transmissions are 0.668 and 1.000.

The structure was solved and the space group *Pnma* (# 62) determined by the **ShelXT** (Sheldrick, 2015) structure solution program using Intrinsic Phasing and refined by Least Squares using version 2018/3 of **ShelXL** (Sheldrick, 2015). All non-hydrogen atoms were refined anisotropically. Hydrogen atom positions were calculated geometrically and refined using the riding model. Hydrogen atom positions were calculated geometrically and refined using the riding model.

*\_exptl\_absorpt\_process\_details*: Empirical Absorption Correction March 2001 T Higashi

The value of  $Z'$  is 0.5. This means that only half of the formula unit is present in the asymmetric unit, with the other half consisting of symmetry equivalent atoms.

## 1.4 Single-crystal structure and packing of **13**

### Crystal Data and Experimental

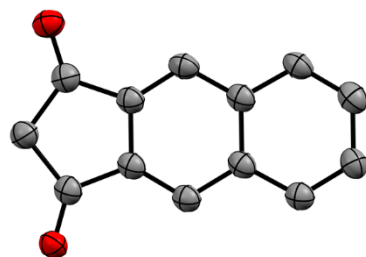

(displacement ellipsoids are shown at 50% probability;  
hydrogen atoms are omitted for clarity)

**Experimental.** Single colourless block-shaped crystals of **13** were recrystallised from a mixture of  $\text{CHCl}_3$  and methanol by solvent layering. The data for **13** were collected from a shock-cooled single crystal at 100(2) K on a Bruker D8 VENTURE dual wavelength Mo/Cu three-circle diffractometer with a microfocus sealed X-ray tube using mirror optics as monochromator and a Bruker PHOTON III detector. The diffractometer was equipped with an Oxford Cryostream 800 low temperature device and used  $\text{CuK}\alpha$  radiation ( $\lambda = 1.54184 \text{ \AA}$ ). All data were integrated with SAINT and a multi-scan absorption correction using SADABS-2016/2 was applied. The structure were solved by direct methods using SHELXT 2014/5 (Sheldrick, 2014) and refined by full-matrix least-squares methods against  $F^2$  by SHELXL-2018/3 (Sheldrick, 2018). All non-hydrogen atoms were refined with anisotropic displacement parameters. The hydrogen atoms were refined isotropically on calculated positions using a riding model with their  $U_{\text{iso}}$  values constrained to 1.5 times the  $U_{\text{eq}}$  of their pivot atoms for terminal  $\text{sp}^3$  carbon atoms and 1.2 times for all other carbon atoms. Crystallographic data (including structure factors) for the structures reported in this paper have been deposited with the Cambridge Crystallographic Data Centre. CCDC 1964046 contain the supplementary crystallographic data for this paper. Copies of the data can be obtained free of charge from The Cambridge Crystallographic Data Centre via [www.ccdc.cam.ac.uk/structures](http://www.ccdc.cam.ac.uk/structures).

| Compound                                  | <b>13</b>                                                          |
|-------------------------------------------|--------------------------------------------------------------------|
| CCDC number                               | 1964046                                                            |
| Empirical formula                         | $\text{C}_{13}\text{H}_8\text{O}_2$                                |
| Formula weight                            | 196.19                                                             |
| Temperature [K]                           | 100(2)                                                             |
| Crystal system                            | monoclinic                                                         |
| Space group (number)                      | $P2_1/c$ (14)                                                      |
| $a$ [Å]                                   | 9.559(13)                                                          |
| $b$ [Å]                                   | 5.316(5)                                                           |
| $c$ [Å]                                   | 17.355(16)                                                         |
| $\alpha$ [Å]                              | 90                                                                 |
| $\beta$ [Å]                               | 92.38(12)                                                          |
| $\gamma$ [Å]                              | 90                                                                 |
| Volume [Å <sup>3</sup> ]                  | 881.1(17)                                                          |
| $Z$                                       | 4                                                                  |
| $\rho_{\text{calc}}$ [g/cm <sup>3</sup> ] | 1.479                                                              |
| $\mu$ [mm <sup>-1</sup> ]                 | 0.809                                                              |
| $F(000)$                                  | 408                                                                |
| Crystal size [mm <sup>3</sup> ]           | 0.16×0.06×0.03                                                     |
| Crystal colour                            | colourless                                                         |
| Crystal shape                             | block                                                              |
| Radiation                                 | $\text{CuK}\alpha$ ( $\lambda=1.54184$ )                           |
| $2\theta$ range [°]                       | 10.20 to 147.47                                                    |
| Index ranges                              | $-11 \leq h \leq 11$<br>$-6 \leq k \leq 5$<br>$-21 \leq l \leq 21$ |
| Reflections collected                     | 21945                                                              |
| Independent reflections                   | 1726<br>$R_{\text{int}} = 0.1011$<br>$R_{\text{sigma}} = 0.0417$   |
| Completeness to $\theta = 67.684^\circ$   | 99.10                                                              |
| Data / Restraints / Parameters            | 1726/0/136                                                         |
| Goodness-of-fit on $F^2$                  | 1.455                                                              |
| Final $R$ indexes [ $\geq 2\sigma(I)$ ]   | $R_1 = 0.0779$<br>$wR_2 = 0.1968$                                  |
| Final $R$ indexes [all data]              | $R_1 = 0.1021$<br>$wR_2 = 0.2149$                                  |
| Largest peak/hole [eÅ <sup>-3</sup> ]     | 0.27/-0.36                                                         |

## 1.5 Single-crystal structure and packing of **14**

### Crystal Data and Experimental

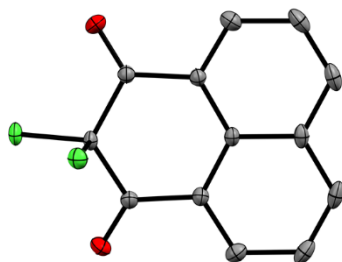

(displacement ellipsoids are shown at 50% probability;  
hydrogen atoms are omitted for clarity)

**Experimental.** Single colourless block-shaped crystals of **14** were recrystallised from a mixture of  $\text{CHCl}_3$  and methanol by solvent layering. The data for **14** were collected from a shock-cooled single crystal at 100(2) K on a Bruker APEX2 QUAZAR three-circle diffractometer with a microfocus sealed X-ray tube using mirror optics as monochromator and a Bruker APEXII detector. The diffractometer was equipped with an Oxford Cryostream 800 low temperature device and used  $\text{MoK}_\alpha$  radiation ( $\lambda = 0.71073 \text{ \AA}$ ). All data were integrated with SAINT and a multi-scan absorption correction using SADABS-2016/2 was applied. The structure were solved by direct methods using SHELXT 2014/5 (Sheldrick, 2014) and refined by full-matrix least-squares methods against  $F^2$  by SHELXL-2018/3 (Sheldrick, 2018). All non-hydrogen atoms were refined with anisotropic displacement parameters. The hydrogen atoms were refined isotropically on calculated positions using a riding model with their  $U_{\text{iso}}$  values constrained to 1.5 times the  $U_{\text{eq}}$  of their pivot atoms for terminal  $\text{sp}^3$  carbon atoms and 1.2 times for all other carbon atoms. Crystallographic data (including structure factors) for the structures reported in this paper have been deposited with the Cambridge Crystallographic Data Centre. CCDC 1964067 contain the supplementary crystallographic data for this paper. Copies of the data can be obtained free of charge from The Cambridge Crystallographic Data Centre via [www.ccdc.cam.ac.uk/structures](http://www.ccdc.cam.ac.uk/structures).

| Compound                                  | <b>14</b>                                                            |
|-------------------------------------------|----------------------------------------------------------------------|
| CCDC number                               | 1964067                                                              |
| Empirical formula                         | $\text{C}_{13}\text{H}_6\text{Cl}_2\text{O}_2$                       |
| Formula weight                            | 265.08                                                               |
| Temperature [K]                           | 100(2)                                                               |
| Crystal system                            | monoclinic                                                           |
| Space group (number)                      | $C2/m$ (12)                                                          |
| $a$ [Å]                                   | 13.357(10)                                                           |
| $b$ [Å]                                   | 12.364(9)                                                            |
| $c$ [Å]                                   | 7.308(5)                                                             |
| $\alpha$ [Å]                              | 90                                                                   |
| $\beta$ [Å]                               | 118.676(16)                                                          |
| $\gamma$ [Å]                              | 90                                                                   |
| Volume [Å <sup>3</sup> ]                  | 1058.8(13)                                                           |
| $Z$                                       | 4                                                                    |
| $\rho_{\text{calc}}$ [g/cm <sup>3</sup> ] | 1.663                                                                |
| $\mu$ [mm <sup>-1</sup> ]                 | 0.595                                                                |
| $F(000)$                                  | 1072                                                                 |
| Crystal size [mm <sup>3</sup> ]           | 0.140×0.100×0.080                                                    |
| Crystal colour                            | yellow                                                               |
| Crystal shape                             | block                                                                |
| Radiation                                 | $\text{MoK}_\alpha$ ( $\lambda = 0.71073$ )                          |
| $2\theta$ range [°]                       | 4.79 to 60.17                                                        |
| Index ranges                              | $-18 \leq h \leq 18$<br>$-17 \leq k \leq 17$<br>$-10 \leq l \leq 10$ |
| Reflections collected                     | 12615                                                                |
| Independent reflections                   | 1541<br>$R_{\text{int}} = 0.0355$<br>$R_{\text{sigma}} = 0.0221$     |
| Completeness to $\theta = 25.242^\circ$   | 100.00                                                               |
| Data / Restraints / Parameters            | 1541/0/85                                                            |
| Goodness-of-fit on $F^2$                  | 0.865                                                                |
| Final $R$ indexes [I ≥ 2σ(I)]             | $R_1 = 0.0260$<br>$wR_2 = 0.0992$                                    |
| Final $R$ indexes [all data]              | $R_1 = 0.0292$<br>$wR_2 = 0.1040$                                    |
| Largest peak/hole [eÅ <sup>-3</sup> ]     | 0.47/-0.23                                                           |

## 1.6 Single-crystal structure and packing of **21**

### Crystal Data and Experimental

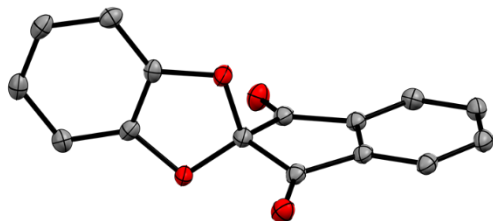

(displacement ellipsoids are shown at 50% probability;  
hydrogen atoms are omitted for clarity)

**Experimental.** Single yellow block-shaped crystals of **21** were recrystallised from a mixture of  $\text{CHCl}_3$  and *n*-hexane by solvent layering. A suitable crystal  $0.16 \times 0.13 \times 0.11 \text{ mm}^3$  was selected and mounted on a MITIGEN holder in perfluoroether oil on an Bruker SMART APEX2 area detector diffractometer. The crystal was kept at a steady  $T = 100 \text{ K}$  during data collection. The structure was solved with the **ShelXT** (Sheldrick, 2015) structure solution program using the Intrinsic Phasing solution method and by using **Olex2** (Dolomanov et al., 2009) as the graphical interface. The model was refined with version 2018/3 of **ShelXL** (Sheldrick, 2015) using Least Squares minimisation.

**Crystal Data.**  $\text{C}_{15}\text{H}_8\text{O}_4$ ,  $M_r = 252.21$ , monoclinic,  $P2_1/n$  (No. 14),  $a = 9.217(11) \text{ \AA}$ ,  $b = 12.573(9) \text{ \AA}$ ,  $c = 9.542(8) \text{ \AA}$ ,  $\beta = 99.09(5)^\circ$ ,  $\alpha = \gamma = 90^\circ$ ,  $V = 1091.9(18) \text{ \AA}^3$ ,  $T = 100 \text{ K}$ ,  $Z = 4$ ,  $Z' = 1$ ,  $\mu(\text{MoK}\alpha) = 0.113$ , 12122 reflections measured, 2497 unique ( $R_{\text{int}} = 0.0207$ ) which were used in all calculations. The final  $wR_2$  was 0.0901 (all data) and  $R_1$  was 0.0363 ( $I > 2(I)$ ).

| Compound                              | <b>21</b>                           |
|---------------------------------------|-------------------------------------|
| CCDC                                  | 1864464                             |
| Formula                               | $\text{C}_{15}\text{H}_8\text{O}_4$ |
| $D_{\text{calc.}} / \text{g cm}^{-3}$ | 1.534                               |
| $\mu / \text{mm}^{-1}$                | 0.113                               |
| Formula Weight                        | 252.21                              |
| Colour                                | yellow                              |
| Shape                                 | block                               |
| Size/ $\text{mm}^3$                   | $0.16 \times 0.13 \times 0.11$      |
| $T / \text{K}$                        | 100                                 |
| Crystal System                        | monoclinic                          |
| Space Group                           | $P2_1/n$                            |
| $a / \text{\AA}$                      | 9.217(11)                           |
| $b / \text{\AA}$                      | 12.573(9)                           |
| $c / \text{\AA}$                      | 9.542(8)                            |
| $\alpha / ^\circ$                     | 90                                  |
| $\beta / ^\circ$                      | 99.09(5)                            |
| $\gamma / ^\circ$                     | 90                                  |
| $V / \text{\AA}^3$                    | 1091.9(18)                          |
| $Z$                                   | 4                                   |
| $Z'$                                  | 1                                   |
| Wavelength/ $\text{\AA}$              | 0.710730                            |
| Radiation type                        | $\text{MoK}\alpha$                  |
| $\theta_{\text{min}} / ^\circ$        | 2.701                               |
| $\theta_{\text{max}} / ^\circ$        | 27.482                              |
| Measured Refl.                        | 12122                               |
| Independent Refl.                     | 2497                                |
| Reflections with $I > 2(I)$           | 2215                                |
| $R_{\text{int}}$                      | 0.0207                              |
| Parameters                            | 172                                 |
| Restraints                            | 0                                   |
| Largest Peak                          | 0.302                               |
| Deepest Hole                          | -0.268                              |
| GooF                                  | 1.045                               |
| $wR_2$ (all data)                     | 0.0901                              |
| $wR_2$                                | 0.0870                              |
| $R_1$ (all data)                      | 0.0409                              |
| $R_1$                                 | 0.0363                              |

A yellow block-shaped crystal with dimensions 0.16×0.13×0.11 mm<sup>3</sup> was mounted on a MITIGEN holder in perfluoroether oil. Data were collected using an Bruker SMART APEX2 area detector diffractometer equipped with an Oxford Cryosystems 800 low-temperature device operating at  $T = 100$  K.

Data were measured using  $\omega$  and  $\phi$  scans using MoK $\alpha$  radiation. The total number of runs and images was based on the strategy calculation from the program **APEX2** (Bruker) The maximum resolution that was achieved was  $\theta = 27.482^\circ$  (0.77 Å).

The diffraction pattern was indexed The total number of runs and images was based on the strategy calculation from the program **APEX2** (Bruker) and the unit cell was refined using **SAINT** (Bruker, V8.38A, after 2013) on 6594 reflections, 54% of the observed reflections.

Data reduction, scaling and absorption corrections were performed using **SAINT** (Bruker, V8.38A, after 2013). The final completeness is 99.80 % out to  $27.482^\circ$  in  $\theta$ . A multi-scan absorption correction was performed using **SADABS-2016/2** (Bruker,2016/2) was used for absorption correction.  $wR_2(\text{int})$  was 0.1123 before and 0.0342 after correction. The Ratio of minimum to maximum transmission is 0.9450. The  $\lambda/2$  correction factor is Not present. The absorption coefficient  $\mu$  of this material is 0.113 mm<sup>-1</sup> at this wavelength ( $\lambda = 0.711$  Å) and the minimum and maximum transmissions are 0.705 and 0.746.

The structure was solved and the space group  $P2_1/n$  (# 14) determined by the **ShelXT** (Sheldrick, 2015) structure solution program using Intrinsic Phasing and refined by Least Squares using version 2018/3 of **ShelXL** (Sheldrick, 2015). All non-hydrogen atoms were refined anisotropically. Hydrogen atom positions were calculated geometrically and refined using the riding model. Hydrogen atom positions were calculated geometrically and refined using the riding model.

*\_exptl\_absorpt\_process\_details:* **SADABS-2016/2** (Bruker,2016/2) was used for absorption correction.  $wR_2(\text{int})$  was 0.1123 before and 0.0342 after correction. The Ratio of minimum to maximum transmission is 0.9450. The  $\lambda/2$  correction factor is Not present.

There is a single molecule in the asymmetric unit, which is represented by the reported sum formula. In other words: Z is 4 and Z' is 1.

## 1.7 Single-crystal structure and packing of **23**

### Crystal Data and Experimental

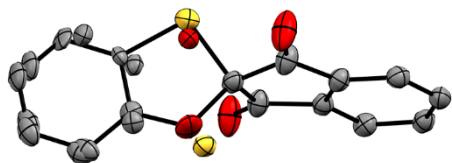

(displacement ellipsoids are shown at 50% probability;  
hydrogen atoms are omitted for clarity)

**Experimental.** Single yellow plate-shaped crystals of **23** were recrystallised from  $\text{CDCl}_3$  by slow evaporation. A suitable crystal  $0.30 \times 0.11 \times 0.03 \text{ mm}^3$  was selected and mounted on a MITIGEN holder in perfluoroether oil on an Bruker SMART APEX2 area detector diffractometer. The crystal was kept at a steady  $T = 109(2) \text{ K}$  during data collection. The structure was solved with the **ShelXT** (Sheldrick, 2015) structure solution program using the Intrinsic Phasing solution method and by using **Olex2** (Dolomanov et al., 2009) as the graphical interface. The model was refined with version 2018/3 of **ShelXL** (Sheldrick, 2015) using Least Squares minimisation.

**Crystal Data.**  $\text{C}_{15}\text{H}_8\text{O}_3\text{S}$ ,  $M_r = 268.27$ , monoclinic,  $P2_1/n$  (No. 14),  $a = 9.457(3) \text{ \AA}$ ,  $b = 9.423(4) \text{ \AA}$ ,  $c = 13.368(5) \text{ \AA}$ ,  $\beta = 90.586(16)^\circ$ ,  $\alpha = \gamma = 90^\circ$ ,  $V = 1191.1(8) \text{ \AA}^3$ ,  $T = 109(2) \text{ K}$ ,  $Z = 4$ ,  $Z' = 1$ ,  $\mu(\text{MoK}\alpha) = 0.271$ , 9330 reflections measured, 2752 unique ( $R_{\text{int}} = 0.0302$ ) which were used in all calculations. The final  $wR_2$  was 0.1227 (all data) and  $R_1$  was 0.0562 ( $I > 2(I)$ ).

| Compound                              | <b>23</b>                                   |
|---------------------------------------|---------------------------------------------|
| CCDC                                  | 1874255                                     |
| Formula                               | $\text{C}_{15}\text{H}_8\text{O}_3\text{S}$ |
| $D_{\text{calc.}} / \text{g cm}^{-3}$ | 1.496                                       |
| $\mu / \text{mm}^{-1}$                | 0.271                                       |
| Formula Weight                        | 268.27                                      |
| Colour                                | yellow                                      |
| Shape                                 | plate                                       |
| Size/ $\text{mm}^3$                   | $0.30 \times 0.11 \times 0.03$              |
| $T/\text{K}$                          | 109(2)                                      |
| Crystal System                        | monoclinic                                  |
| Space Group                           | $P2_1/n$                                    |
| $a/\text{\AA}$                        | 9.457(3)                                    |
| $b/\text{\AA}$                        | 9.423(4)                                    |
| $c/\text{\AA}$                        | 13.368(5)                                   |
| $\alpha/^\circ$                       | 90                                          |
| $\beta/^\circ$                        | 90.586(16)                                  |
| $\gamma/^\circ$                       | 90                                          |
| $V/\text{\AA}^3$                      | 1191.1(8)                                   |
| $Z$                                   | 4                                           |
| $Z'$                                  | 1                                           |
| Wavelength/ $\text{\AA}$              | 0.710730                                    |
| Radiation type                        | $\text{MoK}\alpha$                          |
| $\theta_{\text{min}}/^\circ$          | 2.626                                       |
| $\theta_{\text{max}}/^\circ$          | 27.551                                      |
| Measured Refl.                        | 9330                                        |
| Independent Refl.                     | 2752                                        |
| Reflections with $I > 2\sigma(I)$     | 2257                                        |
| $R_{\text{int}}$                      | 0.0302                                      |
| Parameters                            | 227                                         |
| Restraints                            | 424                                         |
| Largest Peak                          | 0.519                                       |
| Deepest Hole                          | -0.367                                      |
| GooF                                  | 1.128                                       |
| $wR_2$ (all data)                     | 0.1227                                      |
| $wR_2$                                | 0.1179                                      |
| $R_1$ (all data)                      | 0.0716                                      |
| $R_1$                                 | 0.0562                                      |

A yellow plate-shaped crystal with dimensions 0.30×0.11×0.03 mm<sup>3</sup> was mounted on a MITIGEN holder in perfluoroether oil. Data were collected using an Bruker SMART APEX2 area detector diffractometer equipped with an Oxford Cryosystems 800 low-temperature device operating at  $T = 109(2)$  K.

Data were measured using  $\omega$  and  $\phi$  scans using MoK $\alpha$  radiation. The total number of runs and images was based on the strategy calculation from the program **APEX2** (Bruker) The maximum resolution that was achieved was  $\theta = 27.551^\circ$  (0.77 Å).

The diffraction pattern was indexed The total number of runs and images was based on the strategy calculation from the program **APEX2** (Bruker) and the unit cell was refined using **SAINT** (Bruker, V8.38A, after 2013) on 3436 reflections, 37% of the observed reflections.

Data reduction, scaling and absorption corrections were performed using **SAINT** (Bruker, V8.38A, after 2013). The final completeness is 99.80 % out to  $27.551^\circ$  in  $\theta$ . A multi-scan absorption correction was performed using **SADABS-2016/2** (Bruker,2016/2) was used for absorption correction.  $wR_2(\text{int})$  was 0.1259 before and 0.0500 after correction. The Ratio of minimum to maximum transmission is 0.9233. The  $\lambda/2$  correction factor is Not present. The absorption coefficient  $\mu$  of this material is 0.271 mm<sup>-1</sup> at this wavelength ( $\lambda = 0.711$  Å) and the minimum and maximum transmissions are 0.688 and 0.746.

The structure was solved and the space group  $P2_1/n$  (# 14) determined by the **ShelXT** (Sheldrick, 2015) structure solution program using Intrinsic Phasing and refined by Least Squares using version 2018/3 of **ShelXL** (Sheldrick, 2015). All non-hydrogen atoms were refined anisotropically. Hydrogen atom positions were calculated geometrically and refined using the riding model. Hydrogen atom positions were calculated geometrically and refined using the riding model.

*\_exptl\_absorpt\_process\_details:* **SADABS-2016/2** (Bruker,2016/2) was used for absorption correction.  $wR_2(\text{int})$  was 0.1259 before and 0.0500 after correction. The Ratio of minimum to maximum transmission is 0.9233. The  $\lambda/2$  correction factor is Not present.

There is a single molecule in the asymmetric unit, which is represented by the reported sum formula. In other words: Z is 4 and Z' is 1.

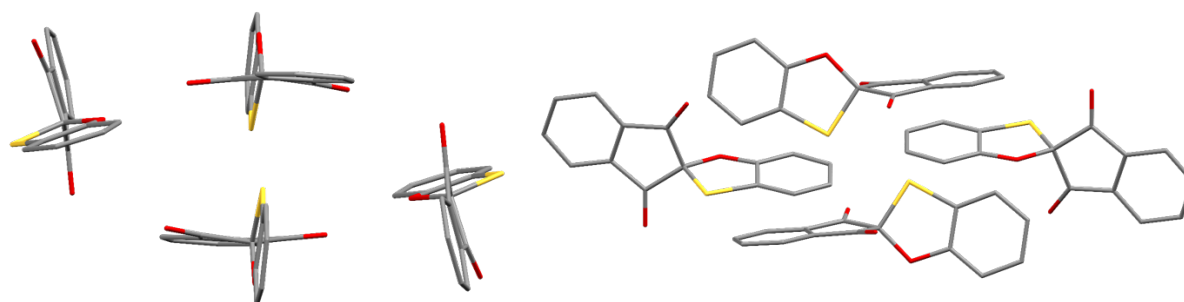

Figure S4: Packing model of **23**.



## 1.8 Single-crystal structure and packing of 25

### Crystal Data and Experimental

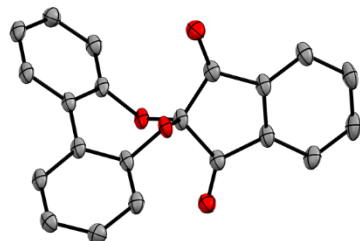

(displacement ellipsoids are shown at 50% probability;  
hydrogen atoms are omitted for clarity)

**Experimental.** Single yellow block-shaped crystals of **25** were recrystallised from a mixture of  $\text{CHCl}_3$  and cyclohexane by solvent layering. A suitable crystal  $0.20 \times 0.14 \times 0.07 \text{ mm}^3$  was selected and mounted on a MITIGEN holder in perfluoroether oil on an Bruker SMART APEX2 area detector diffractometer. The crystal was kept at a steady  $T = 100(2) \text{ K}$  during data collection. The structure was solved with the **ShelXT** (Sheldrick, 2015) structure solution program using the Intrinsic Phasing solution method and by using **Olex2** (Dolomanov et al., 2009) as the graphical interface. The model was refined with version 2018/3 of **ShelXL** (Sheldrick, 2015) using Least Squares minimisation.

**Crystal Data.**  $\text{C}_{42}\text{H}_{24}\text{O}_8$ ,  $M_r = 656.61$ , monoclinic,  $P2_1/n$  (No. 14),  $a = 11.825(15) \text{ \AA}$ ,  $b = 17.04(3) \text{ \AA}$ ,  $c = 16.23(2) \text{ \AA}$ ,  $\beta = 109.86(3)^\circ$ ,  $\alpha = \gamma = 90^\circ$ ,  $V = 3076(8) \text{ \AA}^3$ ,  $T = 100(2) \text{ K}$ ,  $Z = 4$ ,  $Z' = 1$ ,  $\mu(\text{MoK}\alpha) = 0.099$ , 59170 reflections measured, 7087 unique ( $R_{\text{int}} = 0.0797$ ) which were used in all calculations. The final  $wR_2$  was 0.1830 (all data) and  $R_1$  was 0.0684 ( $I > 2(I)$ ).

| Compound                              | 25                                     |
|---------------------------------------|----------------------------------------|
| CCDC                                  | 1864468                                |
| Formula                               | $\text{C}_{42}\text{H}_{24}\text{O}_8$ |
| $D_{\text{calc.}} / \text{g cm}^{-3}$ | 1.418                                  |
| $\mu / \text{mm}^{-1}$                | 0.099                                  |
| Formula Weight                        | 656.61                                 |
| Colour                                | yellow                                 |
| Shape                                 | block                                  |
| Size/ $\text{mm}^3$                   | $0.20 \times 0.14 \times 0.07$         |
| $T/\text{K}$                          | 100(2)                                 |
| Crystal System                        | monoclinic                             |
| Space Group                           | $P2_1/n$                               |
| $a/\text{\AA}$                        | 11.825(15)                             |
| $b/\text{\AA}$                        | 17.04(3)                               |
| $c/\text{\AA}$                        | 16.23(2)                               |
| $\alpha/^\circ$                       | 90                                     |
| $\beta/^\circ$                        | 109.86(3)                              |
| $\gamma/^\circ$                       | 90                                     |
| $V/\text{\AA}^3$                      | 3076(8)                                |
| $Z$                                   | 4                                      |
| $Z'$                                  | 1                                      |
| Wavelength/ $\text{\AA}$              | 0.710730                               |
| Radiation type                        | $\text{MoK}\alpha$                     |
| $\theta_{\text{min}}/^\circ$          | 1.791                                  |
| $\theta_{\text{max}}/^\circ$          | 27.618                                 |
| Measured Refl.                        | 59170                                  |
| Independent Refl.                     | 7087                                   |
| Reflections with $I > 2(I)$           | 5273                                   |
| $R_{\text{int}}$                      | 0.0797                                 |
| Parameters                            | 451                                    |
| Restraints                            | 0                                      |
| Largest Peak                          | 0.614                                  |
| Deepest Hole                          | -0.399                                 |
| GooF                                  | 1.090                                  |
| $wR_2$ (all data)                     | 0.1830                                 |
| $wR_2$                                | 0.1686                                 |
| $R_1$ (all data)                      | 0.0914                                 |
| $R_1$                                 | 0.0684                                 |

A yellow block-shaped crystal with dimensions 0.20×0.14×0.07 mm<sup>3</sup> was mounted on a MITIGEN holder in perfluoroether oil. Data were collected using an Bruker SMART APEX2 area detector diffractometer equipped with an Oxford Cryosystems 800 low-temperature device operating at  $T = 100(2)$  K.

Data were measured using  $\omega$  and  $\phi$  scans using MoK $\alpha$  radiation. The total number of runs and images was based on the strategy calculation from the program **APEX2** (Bruker) The maximum resolution that was achieved was  $\Theta = 27.618^\circ$  (0.77 Å).

The diffraction pattern was indexed The total number of runs and images was based on the strategy calculation from the program **APEX2** (Bruker) and the unit cell was refined using **SAINT** (Bruker, V8.38A, after 2013) on 9915 reflections, 17% of the observed reflections.

Data reduction, scaling and absorption corrections were performed using **SAINT** (Bruker, V8.38A, after 2013). The final completeness is 100.00 % out to 27.618° in  $\Theta$ . A multi-scan absorption correction was performed using **SADABS-2016/2** (Bruker,2016/2) was used for absorption correction.  $wR_2(\text{int})$  was 0.1627 before and 0.0847 after correction. The Ratio of minimum to maximum transmission is 0.6467. The  $\lambda/2$  correction factor is Not present. The absorption coefficient  $\mu$  of this material is 0.099 mm<sup>-1</sup> at this wavelength ( $\lambda = 0.711$  Å) and the minimum and maximum transmissions are 0.482 and 0.746.

The structure was solved and the space group  $P2_1/n$  (# 14) determined by the **ShelXT** (Sheldrick, 2015) structure solution program using Intrinsic Phasing and refined by Least Squares using version 2018/3 of **ShelXL** (Sheldrick, 2015). All non-hydrogen atoms were refined anisotropically. Hydrogen atom positions were calculated geometrically and refined using the riding model. Hydrogen atom positions were calculated geometrically and refined using the riding model.

*\_exptl\_absorpt\_process\_details:* **SADABS-2016/2** (Bruker,2016/2) was used for absorption correction.  $wR_2(\text{int})$  was 0.1627 before and 0.0847 after correction. The Ratio of minimum to maximum transmission is 0.6467. The  $\lambda/2$  correction factor is Not present.

There is a single molecule in the asymmetric unit, which is represented by the reported sum formula. In other words: Z is 4 and Z' is 1.

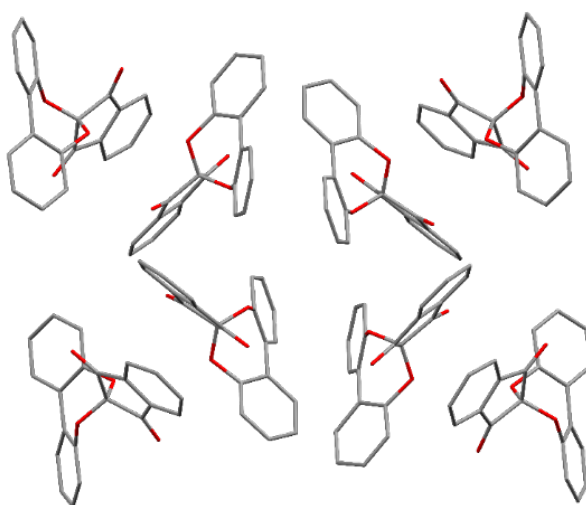

**Figure S5:** Packing of 25.

## 1.9 Single-crystal structure and packing of 26

### Crystal Data and Experimental

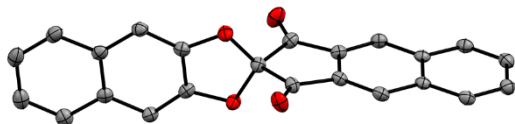

(displacement ellipsoids are shown at 50% probability;  
hydrogen atoms are omitted for clarity)

**Experimental.** Single yellow block-shaped crystals of **26** were obtained by the vapor diffusion DMSO/H<sub>2</sub>O at ambient temperature. A suitable crystal 0.33×0.10×0.08 mm<sup>3</sup> was selected with perfluoropolyether on a Mitegen Loop on an Bruker SMART APEX2 area detector diffractometer. The crystal was kept at a steady  $T = 100.01$  K during data collection. The structure was solved with the **ShelXT** (Sheldrick, 2015) structure solution program using the Intrinsic Phasing solution method and by using **Olex2** (Dolomanov et al., 2009) as the graphical interface. The model was refined with version 2018/3 of **ShelXL** (Sheldrick, 2015) using Least Squares minimisation.

**Crystal Data.** C<sub>23</sub>H<sub>12</sub>O<sub>4</sub>,  $M_r = 352.33$ , orthorhombic,  $Pna2_1$  (No. 33),  $a = 17.395(8)$  Å,  $b = 9.112(4)$  Å,  $c = 10.203(3)$  Å,  $\alpha = \beta = \gamma = 90^\circ$ ,  $V = 1617.2(11)$  Å<sup>3</sup>,  $T = 100.01$  K,  $Z = 4$ ,  $Z' = 1$ ,  $\mu(\text{MoK}\alpha) = 0.099$ , 36026 reflections measured, 4166 unique ( $R_{\text{int}} = 0.0381$ ) which were used in all calculations. The final  $wR_2$  was 0.0944 (all data) and  $R_1$  was 0.0342 ( $I > 2(I)$ ).

| Compound                              | 26                                             |
|---------------------------------------|------------------------------------------------|
| CCDC                                  | 1912192                                        |
| Formula                               | C <sub>23</sub> H <sub>12</sub> O <sub>4</sub> |
| $D_{\text{calc.}} / \text{g cm}^{-3}$ | 1.447                                          |
| $\mu / \text{mm}^{-1}$                | 0.099                                          |
| Formula Weight                        | 352.33                                         |
| Colour                                | yellow                                         |
| Shape                                 | block                                          |
| Size/mm <sup>3</sup>                  | 0.33×0.10×0.08                                 |
| $T/\text{K}$                          | 100.01                                         |
| Crystal System                        | orthorhombic                                   |
| Flack Parameter                       | -0.6(4)                                        |
| Hooft Parameter                       | -0.3(2)                                        |
| Space Group                           | $Pna2_1$                                       |
| $a/\text{\AA}$                        | 17.395(8)                                      |
| $b/\text{\AA}$                        | 9.112(4)                                       |
| $c/\text{\AA}$                        | 10.203(3)                                      |
| $\alpha/^\circ$                       | 90                                             |
| $\beta/^\circ$                        | 90                                             |
| $\gamma/^\circ$                       | 90                                             |
| $V/\text{\AA}^3$                      | 1617.2(11)                                     |
| $Z$                                   | 4                                              |
| $Z'$                                  | 1                                              |
| Wavelength/Å                          | 0.71073                                        |
| Radiation type                        | MoK $\alpha$                                   |
| $\theta_{\text{min}}/^\circ$          | 2.342                                          |
| $\theta_{\text{max}}/^\circ$          | 28.704                                         |
| Measured Refl.                        | 36026                                          |
| Independent Refl.                     | 4166                                           |
| Reflections with $I > 3\sigma(I)$     | 3953                                           |
| $R_{\text{int}}$                      | 0.0381                                         |
| Parameters                            | 244                                            |
| Restraints                            | 1                                              |
| Largest Peak                          | 0.298                                          |
| Deepest Hole                          | -0.177                                         |
| GooF                                  | 1.085                                          |
| $wR_2$ (all data)                     | 0.0944                                         |
| $wR_2$                                | 0.0925                                         |
| $R_1$ (all data)                      | 0.0364                                         |
| $R_1$                                 | 0.0342                                         |

A yellow block-shaped crystal with dimensions 0.33×0.10×0.08 mm<sup>3</sup> was selected and fixed with perfluoropolyether on a Mitegen Loop. Data were collected using an Bruker SMART APEX2 area detector diffractometer operating at  $T = 100.01$  K.

Data were measured using  $\omega$  and  $\phi$  scans using MoK $\alpha$  radiation. The total number of runs and images was based on the strategy calculation from the program Bruker APEX3 software. The maximum resolution that was achieved was  $\Theta = 28.704^\circ$  (0.74 Å).

The diffraction pattern was indexed. The total number of runs and images was based on the strategy calculation from the program Bruker APEX3 software and the unit cell was refined using **SAINT** (Bruker, V8.38A, after 2013) on 9866 reflections, 27% of the observed reflections.

Data reduction, scaling and absorption corrections were performed using **SAINT** (Bruker, V8.38A, after 2013). The final completeness is 100.00 % out to  $28.704^\circ$  in  $\Theta$ . A multi-scan absorption correction was performed using **SADABS-2016/2** (Bruker, 2016/2) was used for absorption correction.  $wR_2(\text{int})$  was 0.1307 before and 0.0507 after correction. The Ratio of minimum to maximum transmission is 0.8728. The  $\lambda/2$  correction factor is not present. The absorption coefficient  $\mu$  of this material is 0.099 mm<sup>-1</sup> at this wavelength ( $\lambda = 0.711$  Å) and the minimum and maximum transmissions are 0.651 and 0.746.

The structure was solved and the space group  $Pna2_1$  (# 33) determined by the **ShelXT** (Sheldrick, 2015) structure solution program using Intrinsic Phasing and refined by Least Squares using version 2018/3 of **ShelXL** (Sheldrick, 2015). All non-hydrogen atoms were refined anisotropically. Hydrogen atom positions were calculated geometrically and refined using the riding model. Hydrogen atom positions were calculated geometrically and refined using the riding model.

\_exptl\_absorpt\_process\_details: **SADABS-2016/2** (Bruker, 2016/2) was used for absorption correction.  $wR_2(\text{int})$  was 0.1307 before and 0.0507 after correction. The Ratio of minimum to maximum transmission is 0.8728. The  $\lambda/2$  correction factor is Not present.

There is a single molecule in the asymmetric unit, which is represented by the reported sum formula. In other words: Z is 4 and Z' is 1.

The Flack parameter was refined to -0.6(4). Determination of absolute structure using Bayesian statistics on Bijvoet differences using the Olex2 results in -0.3(2). Note: The Flack parameter is used to determine chirality of the crystal studied, the value should be near 0, a value of 1 means that the stereochemistry is wrong and the model should be inverted. A value of 0.5 means that the crystal consists of a racemic mixture of the two enantiomers.

## 1.10 Single-crystal structure and packing of 27

### Crystal Data and Experimental

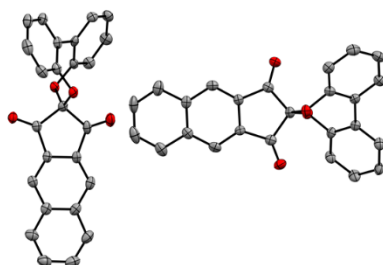

(displacement ellipsoids are shown at 50% probability;  
hydrogen atoms are omitted for clarity)

**Experimental.** Single colourless block-shaped crystals of **27** were recrystallised from a mixture of  $\text{CHCl}_3$  and methanol by solvent layering. A suitable crystal  $0.20 \times 0.17 \times 0.10 \text{ mm}^3$  was selected and mounted on a MITIGEN holder in perfluoroether oil on an Bruker SMART APEX2 area detector diffractometer. The crystal was kept at a steady  $T = 100(2) \text{ K}$  during data collection. The structure was solved with the **ShelXT** (Sheldrick, 2015) structure solution program using the Intrinsic Phasing solution method and by using **Olex2** (Dolomanov et al., 2009) as the graphical interface. The model was refined with version 2018/3 of **ShelXL** (Sheldrick, 2015) using Least Squares minimisation.

**Crystal Data.**  $\text{C}_{25}\text{H}_{14}\text{O}_4$ ,  $M_r = 378.36$ , orthorhombic,  $P2_12_12_1$  (No. 19),  $a = 13.845(5) \text{ \AA}$ ,  $b = 13.921(5) \text{ \AA}$ ,  $c = 18.938(7) \text{ \AA}$ ,  $\alpha = \beta = \gamma = 90^\circ$ ,  $V = 3650(2) \text{ \AA}^3$ ,  $T = 100(2) \text{ K}$ ,  $Z = 8$ ,  $Z' = 2$ ,  $\mu(\text{MoK}\alpha) = 0.093$ , 74657 reflections measured, 7595 unique ( $R_{\text{int}} = 0.0809$ ) which were used in all calculations. The final  $wR_2$  was 0.0839 (all data) and  $R_1$  was 0.0404 ( $I > 2(I)$ ).

| Compound                              | 27                                     |
|---------------------------------------|----------------------------------------|
| CCDC                                  | 1900045                                |
| Formula                               | $\text{C}_{25}\text{H}_{14}\text{O}_4$ |
| $D_{\text{calc.}} / \text{g cm}^{-3}$ | 1.377                                  |
| $\mu / \text{mm}^{-1}$                | 0.093                                  |
| Formula Weight                        | 378.36                                 |
| Colour                                | colourless                             |
| Shape                                 | block                                  |
| Size/ $\text{mm}^3$                   | $0.20 \times 0.17 \times 0.10$         |
| $T / \text{K}$                        | 100(2)                                 |
| Crystal System                        | orthorhombic                           |
| Flack Parameter                       | 0.6(4)                                 |
| Hooft Parameter                       | 1.0(5)                                 |
| Space Group                           | $P2_12_12_1$                           |
| $a / \text{\AA}$                      | 13.845(5)                              |
| $b / \text{\AA}$                      | 13.921(5)                              |
| $c / \text{\AA}$                      | 18.938(7)                              |
| $\alpha / ^\circ$                     | 90                                     |
| $\beta / ^\circ$                      | 90                                     |
| $\gamma / ^\circ$                     | 90                                     |
| $V / \text{\AA}^3$                    | 3650(2)                                |
| $Z$                                   | 8                                      |
| $Z'$                                  | 2                                      |
| Wavelength/ $\text{\AA}$              | 0.710730                               |
| Radiation type                        | $\text{MoK}\alpha$                     |
| $\theta_{\text{min}} / ^\circ$        | 1.075                                  |
| $\theta_{\text{max}} / ^\circ$        | 26.570                                 |
| Measured Refl.                        | 74657                                  |
| Independent Refl.                     | 7595                                   |
| Reflections with $I > 2(I)$           | 6776                                   |
| $R_{\text{int}}$                      | 0.0809                                 |
| Parameters                            | 524                                    |
| Restraints                            | 0                                      |
| Largest Peak                          | 0.170                                  |
| Deepest Hole                          | -0.175                                 |
| GooF                                  | 1.074                                  |
| $wR_2$ (all data)                     | 0.0839                                 |
| $wR_2$                                | 0.0794                                 |
| $R_1$ (all data)                      | 0.0506                                 |
| $R_1$                                 | 0.0404                                 |

A colourless block-shaped crystal with dimensions 0.20×0.17×0.10 mm<sup>3</sup> was mounted on a MITIGEN holder in perfluoroether oil. Data were collected using an Bruker SMART APEX2 area detector diffractometer equipped with an Oxford Cryosystems 800 low-temperature device operating at  $T = 100(2)$  K. Data were measured using  $\omega$  and  $\phi$  scans using MoK $_{\alpha}$  radiation. The total number of runs and images was based on the strategy calculation from the program **APEX2** (Bruker). The maximum resolution that was achieved was  $\Theta = 26.570^\circ$  (0.79 Å). The diffraction pattern was indexed. The total number of runs and images was based on the strategy calculation from the program **APEX2** (Bruker) and the unit cell was refined using **SAINT** (Bruker, V8.38A, after 2013) on 9959 reflections, 13% of the observed reflections. Data reduction, scaling and absorption corrections were performed using **SAINT** (Bruker, V8.38A, after 2013). The final completeness is 100.00 % out to  $26.570^\circ$  in  $\Theta$ . A multi-scan absorption correction was performed using **SADABS-2016/2** (Bruker, 2016/2) was used for absorption correction.  $wR_2(\text{int})$  was 0.0773 before and 0.0683 after correction. The Ratio of minimum to maximum transmission is 0.9188. The  $\lambda/2$  correction factor is Not present. The absorption coefficient  $\mu$  of this material is 0.093 mm<sup>-1</sup> at this wavelength ( $\lambda = 0.711$  Å) and the minimum and maximum transmissions are 0.685 and 0.745. The structure was solved and the space group  $P2_12_12_1$  (# 19) determined by the **ShelXT** (Sheldrick, 2015) structure solution program using Intrinsic Phasing and refined by Least Squares using version 2018/3 of **ShelXL** (Sheldrick, 2015). All non-hydrogen atoms were refined anisotropically. Hydrogen atom positions were calculated geometrically and refined using the riding model. Hydrogen atom positions were calculated geometrically and refined using the riding model. *\_refine\_special\_details:* Refined as a 2-component twin. *\_exptl\_absorpt\_process\_details:* **SADABS-2016/2** (Bruker, 2016/2) was used for absorption correction.  $wR_2(\text{int})$  was 0.0773 before and 0.0683 after correction. The Ratio of minimum to maximum transmission is 0.9188. The  $\lambda/2$  correction factor is Not present. The value of  $Z'$  is 2. This means that there are two independent molecules in the asymmetric unit.

The Flack parameter was refined to 0.6(4). Determination of absolute structure using Bayesian statistics on Bijvoet differences using the Olex2 results in 1.0(5). Note: The Flack parameter is used to determine chirality of the crystal studied, the value should be near 0, a value of 1 means that the stereochemistry is wrong and the model should be inverted. A value of 0.5 means that the crystal consists of a racemic mixture of the two enantiomers.

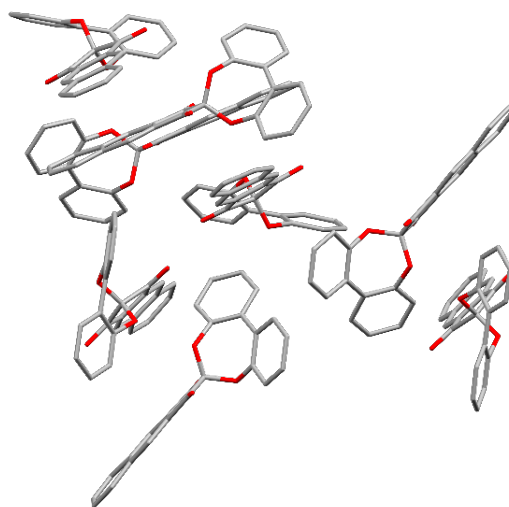

**Figure S6:** Packing model of **27**.

## 1.11 Single-crystal structure and packing of 29

### Crystal Data and Experimental

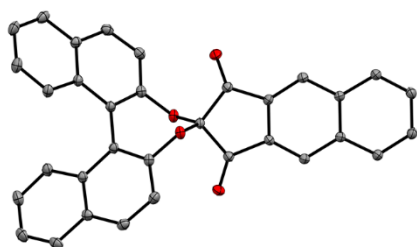

(displacement ellipsoids are shown at 50% probability;  
hydrogen atoms are omitted for clarity)

**Experimental.** Single colourless block-shaped crystals of **29** were recrystallised from a mixture of  $\text{CHCl}_3$  and methanol by solvent layering. The data for **29** were collected from a shock-cooled single crystal at 100(2) K on a Bruker APEX2 QUAZAR three-circle diffractometer with a microfocus sealed X-ray tube using mirror optics as monochromator and a Bruker APEXII detector. The diffractometer was equipped with an Oxford Cryostream 800 low temperature device and used  $\text{MoK}_\alpha$  radiation ( $\lambda = 0.71073 \text{ \AA}$ ). All data were integrated with SAINT and a multi-scan absorption correction using SADABS-2016/2 was applied. The structure were solved by direct methods using SHELXT 2014/5 (Sheldrick, 2014) and refined by full-matrix least-squares methods against  $F^2$  by SHELXL-2018/3 (Sheldrick, 2018). All non-hydrogen atoms were refined with anisotropic displacement parameters. The hydrogen atoms were refined isotropically on calculated positions using a riding model with their  $U_{\text{iso}}$  values constrained to 1.5 times the  $U_{\text{eq}}$  of their pivot atoms for terminal  $\text{sp}^3$  carbon atoms and 1.2 times for all other carbon atoms. Crystallographic data (including structure factors) for the structures reported in this paper have been deposited with the Cambridge Crystallographic Data Centre. CCDC 1964127 contain the supplementary crystallographic data for this paper. Copies of the data can be obtained free of charge from The Cambridge Crystallographic Data Centre via [www.ccdc.cam.ac.uk/structures](http://www.ccdc.cam.ac.uk/structures).

| Compound                                  | 29                                                                   |
|-------------------------------------------|----------------------------------------------------------------------|
| CCDC number                               | 1964127                                                              |
| Empirical formula                         | $\text{C}_{33}\text{H}_{18}\text{O}_4$                               |
| Formula weight                            | 478.47                                                               |
| Temperature [K]                           | 100(2)                                                               |
| Crystal system                            | orthorhombic                                                         |
| Space group (number)                      | $C222_1$ (20)                                                        |
| $a$ [Å]                                   | 8.351(4)                                                             |
| $b$ [Å]                                   | 21.414(6)                                                            |
| $c$ [Å]                                   | 13.480(4)                                                            |
| $\alpha$ [°]                              | 90                                                                   |
| $\beta$ [°]                               | 90                                                                   |
| $\gamma$ [°]                              | 90                                                                   |
| Volume [Å <sup>3</sup> ]                  | 2410.7(15)                                                           |
| $Z$                                       | 4                                                                    |
| $\rho_{\text{calc}}$ [g/cm <sup>3</sup> ] | 1.318                                                                |
| $\mu$ [mm <sup>-1</sup> ]                 | 0.086                                                                |
| $F(000)$                                  | 992                                                                  |
| Crystal size [mm <sup>3</sup> ]           | 0.10×0.08×0.05                                                       |
| Crystal colour                            | yellow                                                               |
| Crystal shape                             | block                                                                |
| Radiation                                 | $\text{MoK}_\alpha$ ( $\lambda = 0.71073$ )                          |
| $2\theta$ range [°]                       | 3.80 to 61.92                                                        |
| Index ranges                              | $-11 \leq h \leq 12$<br>$-30 \leq k \leq 30$<br>$-19 \leq l \leq 19$ |
| Reflections collected                     | 39656                                                                |
| Independent reflections                   | 3683<br>$R_{\text{int}} = 0.0253$<br>$R_{\text{sigma}} = 0.0141$     |
| Completeness to $\theta = 25.242^\circ$   | 99.50                                                                |
| Data / Restraints / Parameters            | 3683/0/168                                                           |
| Goodness-of-fit on $F^2$                  | 1.071                                                                |
| Final $R$ indexes [ $\geq 2\sigma(I)$ ]   | $R_1 = 0.0362$<br>$wR_2 = 0.1175$                                    |
| Final $R$ indexes [all data]              | $R_1 = 0.0375$<br>$wR_2 = 0.1194$                                    |
| Largest peak/hole [eÅ <sup>-3</sup> ]     | 0.41/-0.23                                                           |
| Flack X parameter                         | 0.01(17)                                                             |



A colourless block-shaped crystal with dimensions 0.10×0.08×0.05 mm<sup>3</sup> was mounted on a MITIGEN holder in perfluoroether oil. Data were collected using an Bruker SMART APEX2 area detector diffractometer equipped with an Oxford Cryosystems 800 low-temperature device operating at  $T = 100$  K.

Data were measured using  $\omega$  and  $\phi$  scans using MoK $\alpha$  radiation. The total number of runs and images was based on the strategy calculation from the program **APEX2** (Bruker) The maximum resolution that was achieved was  $\theta = 33.185^\circ$  (0.65 Å).

The total number of runs and images was based on the strategy calculation from the program **APEX2** (Bruker) and the unit cell was refined using **SAINT** (Bruker, V8.38A, after 2013) on 3683 reflections.

Data reduction, scaling and absorption corrections were performed using **SAINT** (Bruker, V8.38A, after 2013). The final completeness is 100.00 % out to 33.185° in  $\theta$ . A multi-scan absorption correction was performed using **SADABS-2016/2** (Bruker, 2016/2) was used for absorption correction.  $wR_2(\text{int})$  was 0.1407 before and 0.0485 after correction. The Ratio of minimum to maximum transmission is 0.9321. The  $\lambda/2$  correction factor is not present. The absorption coefficient  $\mu$  of this material is 0.291 mm<sup>-1</sup> at this wavelength ( $\lambda = 0.711$  Å) and the minimum and maximum transmissions are 0.696 and 0.747.

The structure was solved and the space group  $C222_1$  (20) determined by the **ShelXT** (Sheldrick, 2015) structure solution program using Intrinsic Phasing and refined by Least Squares using version 2018/3 of **ShelXL** (Sheldrick, 2015). All non-hydrogen atoms were refined anisotropically. Hydrogen atom positions were calculated geometrically and refined using the riding model. Hydrogen atom positions were calculated geometrically and refined using the riding model.

There is a single molecule in the asymmetric unit, which is represented by the reported sum formula. In other words: Z is 4 and Z' is 1.

The Flack parameter was refined to 0.01(17). A value of 0.5 means that the crystal consists of a racemic mixture of the two enantiomers.

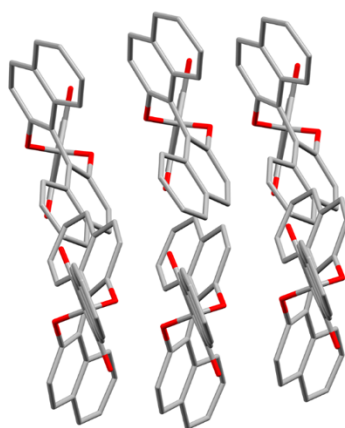

**Figure S7:** Packing of **29**.



## 1.12 Single-crystal structure and packing of **32**

### Crystal Data and Experimental

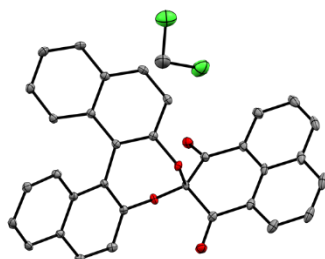

(displacement ellipsoids are shown at 50% probability;  
hydrogen atoms are omitted for clarity)

**Experimental.** Single colourless block-shaped crystals of **32** were recrystallised from  $\text{CH}_2\text{Cl}_2$  by slow evaporation. A suitable crystal  $0.25 \times 0.14 \times 0.08 \text{ mm}^3$  was selected and mounted on a MITIGEN holder in perfluoroether oil on an Bruker SMART APEX2 area detector diffractometer. The crystal was kept at a steady  $T = 100 \text{ K}$  during data collection. The structure was solved with the **ShelXT** (Sheldrick, 2015) structure solution program using the Intrinsic Phasing solution method and by using **Olex2** (Dolomanov et al., 2009) as the graphical interface. The model was refined with version 2018/3 of **ShelXL** (Sheldrick, 2015) using Least Squares minimisation.

**Crystal Data.**  $\text{C}_{34}\text{H}_{20}\text{Cl}_2\text{O}_4$ ,  $M_r = 563.40$ , orthorhombic,  $P2_12_12_1$  (No. 19),  $a = 5.3479(8) \text{ \AA}$ ,  $b = 17.257(3) \text{ \AA}$ ,  $c = 28.107(4) \text{ \AA}$ ,  $\alpha = \beta = \gamma = 90^\circ$ ,  $V = 2593.9(6) \text{ \AA}^3$ ,  $T = 100 \text{ K}$ ,  $Z = 4$ ,  $Z' = 1$ ,  $\mu(\text{MoK}\alpha) = 0.291$ , 34844 reflections measured, 8789 unique ( $R_{\text{int}} = 0.0333$ ) which were used in all calculations. The final  $wR_2$  was 0.1312 (all data) and  $R_1$  was 0.0496 ( $I > 2(I)$ ).

| Compound                            | <b>32</b>                                         |
|-------------------------------------|---------------------------------------------------|
| CCDC                                | 1886536                                           |
| Formula                             | $\text{C}_{34}\text{H}_{20}\text{Cl}_2\text{O}_4$ |
| $D_{\text{calc.}}/\text{g cm}^{-3}$ | 1.443                                             |
| $\mu/\text{mm}^{-1}$                | 0.291                                             |
| Formula Weight                      | 563.40                                            |
| Colour                              | colourless                                        |
| Shape                               | block                                             |
| Size/ $\text{mm}^3$                 | $0.25 \times 0.14 \times 0.08$                    |
| $T/\text{K}$                        | 100                                               |
| Crystal System                      | orthorhombic                                      |
| Flack Parameter                     | 0.025(17)                                         |
| Hooft Parameter                     | 0.008(17)                                         |
| Space Group                         | $P2_12_12_1$                                      |
| $a/\text{\AA}$                      | 5.3479(8)                                         |
| $b/\text{\AA}$                      | 17.257(3)                                         |
| $c/\text{\AA}$                      | 28.107(4)                                         |
| $\alpha/^\circ$                     | 90                                                |
| $\beta/^\circ$                      | 90                                                |
| $\gamma/^\circ$                     | 90                                                |
| $V/\text{\AA}^3$                    | 2593.9(6)                                         |
| $Z$                                 | 4                                                 |
| $Z'$                                | 1                                                 |
| Wavelength/ $\text{\AA}$            | 0.710730                                          |
| Radiation type                      | $\text{MoK}\alpha$                                |
| $\theta_{\text{min}}/^\circ$        | 1.385                                             |
| $\theta_{\text{max}}/^\circ$        | 33.185                                            |
| Measured Refl.                      | 34844                                             |
| Independent Refl.                   | 8789                                              |
| Reflections with $I > 2(I)$         | 7572                                              |
| $R_{\text{int}}$                    | 0.0333                                            |
| Parameters                          | 361                                               |
| Restraints                          | 0                                                 |
| Largest Peak                        | 0.412                                             |
| Deepest Hole                        | -0.715                                            |
| GooF                                | 1.039                                             |
| $wR_2$ (all data)                   | 0.1312                                            |
| $wR_2$                              | 0.1251                                            |
| $R_1$ (all data)                    | 0.0612                                            |
| $R_1$                               | 0.0496                                            |

A colourless block-shaped crystal with dimensions 0.25×0.14×0.08 mm<sup>3</sup> was mounted on a MITIGEN holder in perfluoroether oil. Data were collected using an Bruker SMART APEX2 area detector diffractometer equipped with an Oxford Cryosystems 800 low-temperature device operating at  $T = 100$  K.

Data were measured using  $\omega$  and  $\phi$  scans using MoK $\alpha$  radiation. The total number of runs and images was based on the strategy calculation from the program **APEX2** (Bruker) The maximum resolution that was achieved was  $\theta = 33.185^\circ$  (0.65 Å).

The diffraction pattern was indexed The total number of runs and images was based on the strategy calculation from the program **APEX2** (Bruker) and the unit cell was refined using **SAINT** (Bruker, V8.38A, after 2013) on 9869 reflections, 28% of the observed reflections.

Data reduction, scaling and absorption corrections were performed using **SAINT** (Bruker, V8.38A, after 2013). The final completeness is 100.00 % out to 33.185° in  $\theta$ . A multi-scan absorption correction was performed using **SADABS**-2016/2 (Bruker,2016/2) was used for absorption correction.  $wR_2(\text{int})$  was 0.1407 before and 0.0485 after correction. The Ratio of minimum to maximum transmission is 0.9321. The  $\lambda/2$  correction factor is Not present.. The absorption coefficient  $\mu$  of this material is 0.291 mm<sup>-1</sup> at this wavelength ( $\lambda = 0.711$  Å) and the minimum and maximum transmissions are 0.696 and 0.747.

The structure was solved and the space group  $P2_12_12_1$  (# 19) determined by the **ShelXT** (Sheldrick, 2015) structure solution program using Intrinsic Phasing and refined by Least Squares using version 2018/3 of **ShelXL** (Sheldrick, 2015). All non-hydrogen atoms were refined anisotropically. Hydrogen atom positions were calculated geometrically and refined using the riding model. Hydrogen atom positions were calculated geometrically and refined using the riding model.

*\_exptl\_absorpt\_process\_details:* **SADABS**-2016/2 (Bruker,2016/2) was used for absorption correction.  $wR_2(\text{int})$  was 0.1407 before and 0.0485 after correction. The Ratio of minimum to maximum transmission is 0.9321. The  $\lambda/2$  correction factor is Not present.

There is a single molecule in the asymmetric unit, which is represented by the reported sum formula. In other words: Z is 4 and Z' is 1.

The Flack parameter was refined to 0.025(17). Determination of absolute structure using Bayesian statistics on Bijvoet differences using the Olex2 results in 0.008(17). Note: The Flack parameter is used to determine chirality of the crystal studied, the value should be near 0, a value of 1 means that the stereochemistry is wrong and the model should be inverted. A value of 0.5 means that the crystal consists of a racemic mixture of the two enantiomers.

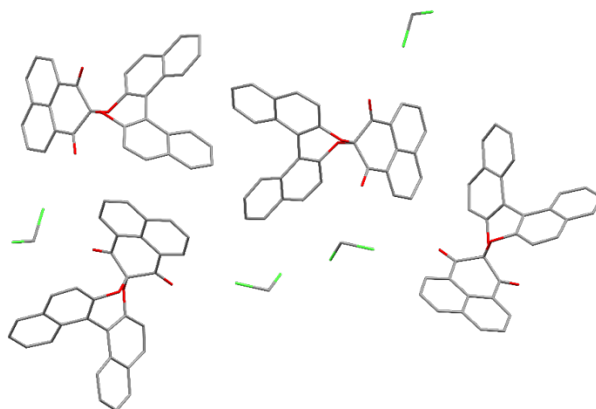

**Figure S8:** Packing model of **32**.

## 2. Cyclic Voltammograms

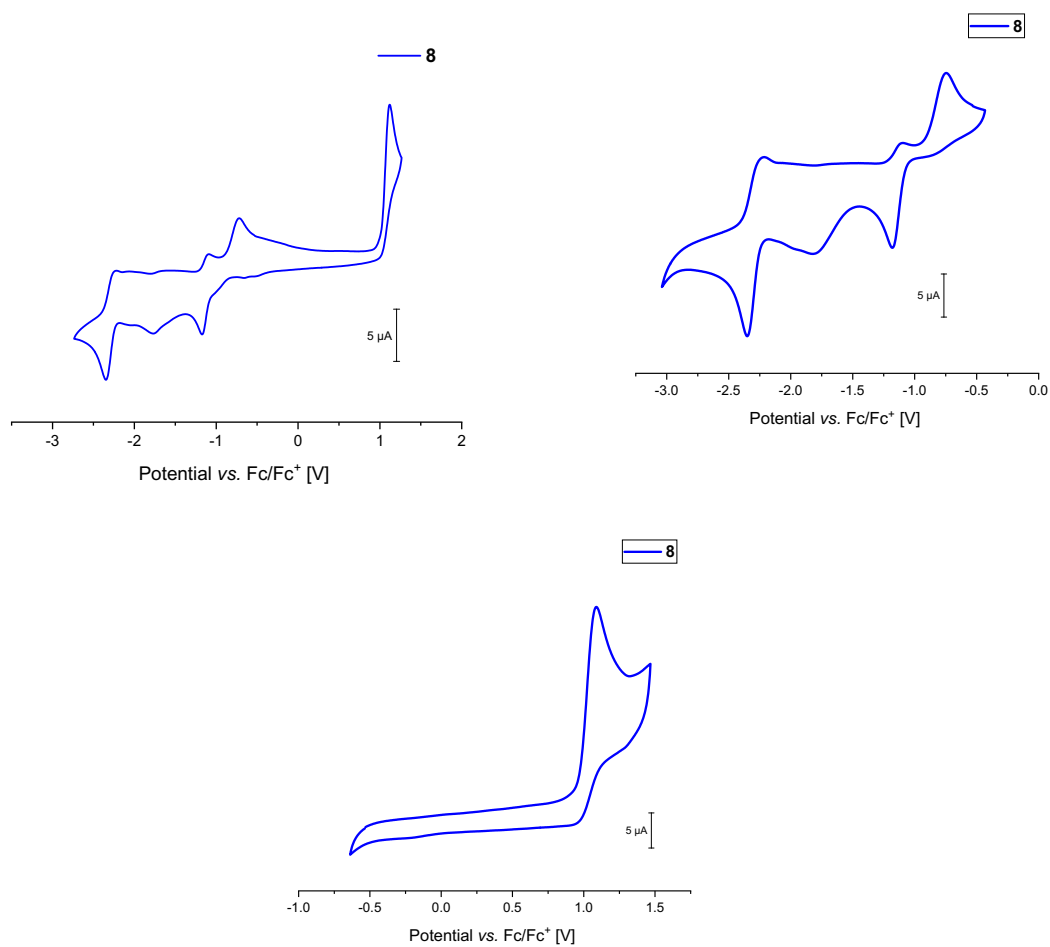

**Figure S9:** Cyclic voltammograms of **8** in acetonitrile at 100 mV/s scan rate using a glassy carbon electrode.

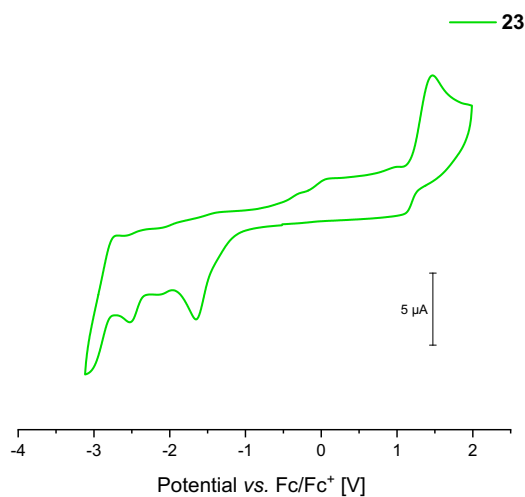

**Figure S10:** Cyclic voltammogram of **23** in acetonitrile at 100 mV/s scan rate using a glassy carbon electrode.

### 3. Optical Properties

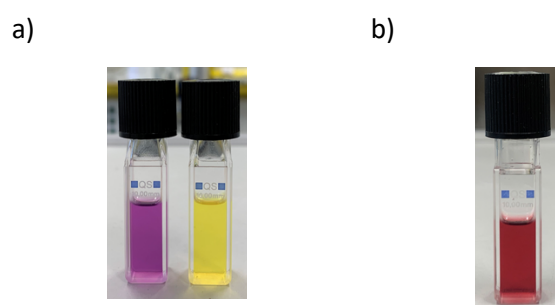

**Figure S11:** a) Solutions of spiro compounds **8** (left) and **7** (right) in  $\text{CH}_2\text{Cl}_2$ ; b) Solution of **4** in  $\text{CH}_2\text{Cl}_2$ .

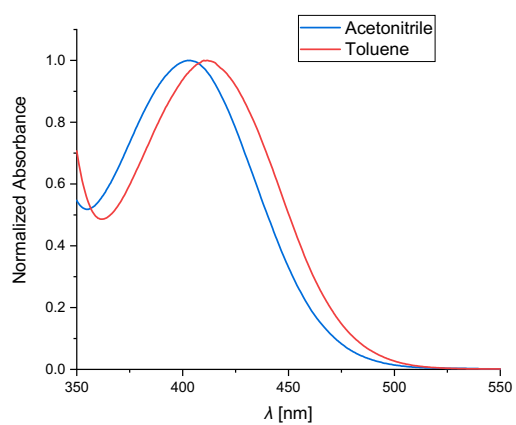

**Figure S12:** Absorption spectra of **7** in solvents of different polarity.

## 4. Thermal Measurements

### 4.1 Thermogravimetric Analyses

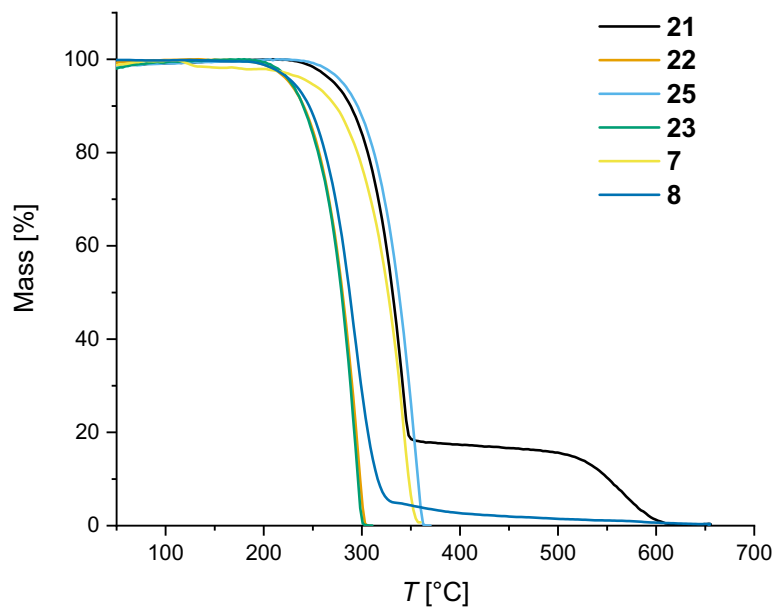

**Figure S13:** TGA measurements under inert N<sub>2</sub> atmosphere at a heating rate of 10 K·min<sup>-1</sup>.

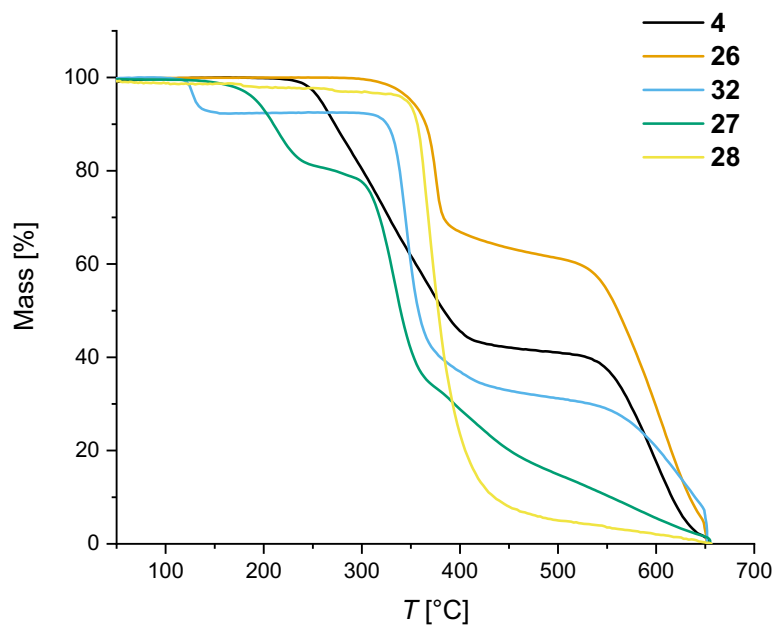

**Figure S14:** TGA measurements under inert N<sub>2</sub> atmosphere at a heating rate of 10 K·min<sup>-1</sup>.

## 4.2 Differential Scanning Calorimetry

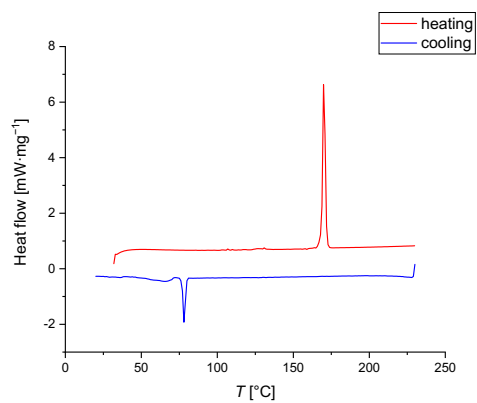

Figure S15: DSC of **7** at a heating rate of  $10\text{ K}\cdot\text{min}^{-1}$ .

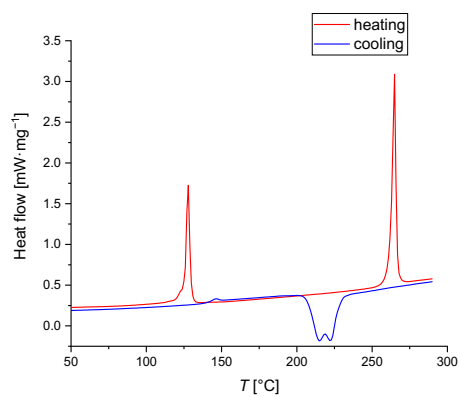

Figure S16: DSC of **32** at a heating rate of  $10\text{ K}\cdot\text{min}^{-1}$ .

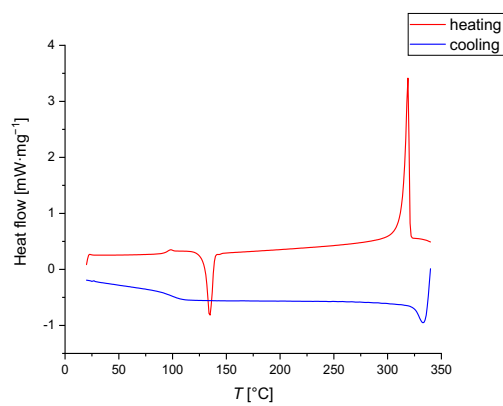

Figure S17: DSC of **30** at a heating rate of  $10\text{ K}\cdot\text{min}^{-1}$ .

## 5. DFT Calculations

DFT calculations were performed with either the TURBOMOLE v7.3 program package.<sup>[4]</sup> The resolution-of-identity<sup>[5]</sup> (RI, RIJDX for SP) approximation for the Coulomb integrals was used in all DFT calculations employing matching auxiliary basis set def2-XVP/J.<sup>[6]</sup> Furthermore, the D3 dispersion correction scheme<sup>[7]</sup> with the Becke-Johnson damping function was applied.<sup>[8]</sup> Using the TURBOMOLE v7.3 program package, the geometries of all molecules were optimized without symmetry restrictions with the PBEh-3c<sup>[9]</sup>-D3/def2-mSVP composite scheme followed by harmonic vibrational frequency analysis to confirm minima as stationary points. Vertical excitation energies were calculated using TDDFT applying the B3LYP<sup>[9]</sup> functional with the def2-TZVP basis set.<sup>[10]</sup>

### 5.1 Frontier Molecular Orbitals

**Table S1:** Frontier molecular orbitals of **7** (top) and **8** (bottom) (B3LYP-D3/def2-TZVP).

| HOMO                                                                                | LUMO                                                                                 |
|-------------------------------------------------------------------------------------|--------------------------------------------------------------------------------------|
| 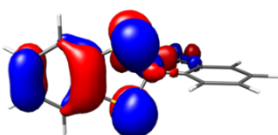   |    |
|  |  |

**Table S2:** Frontier molecular orbitals of **4** (top) and **21** (bottom) (B3LYP-D3/def2-TZVP).

| HOMO                                                                                | LUMO                                                                                 |
|-------------------------------------------------------------------------------------|--------------------------------------------------------------------------------------|
| 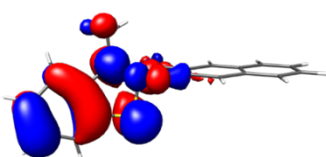 |  |
|  |  |

**Table S3:** Frontier molecular orbitals of **22** (top) and **25** (bottom) (B3LYP-D3/def2-TZVP).

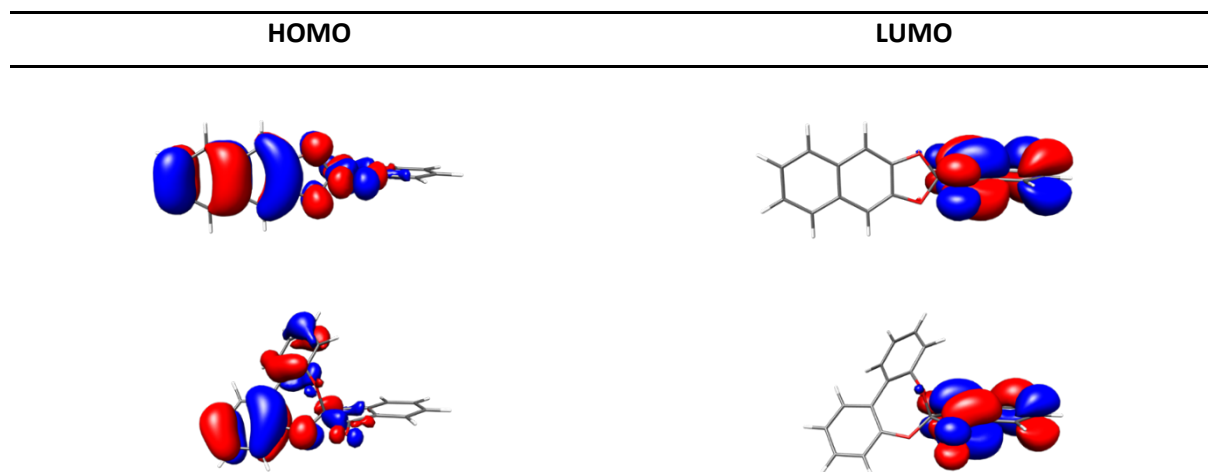

**Table S4:** Frontier molecular orbitals of **23** (top) and **30** (bottom) (B3LYP-D3/def2-TZVP).

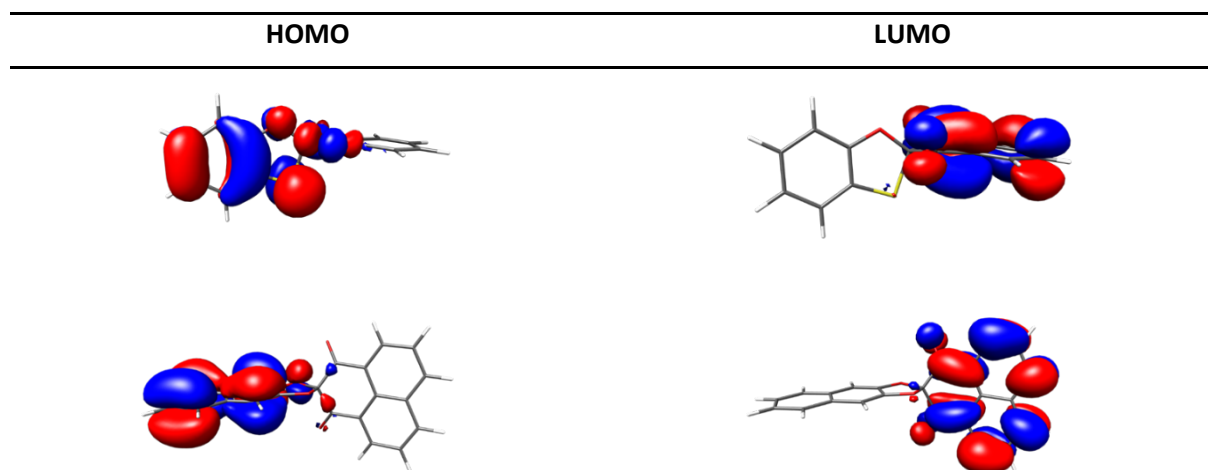

**Table S5:** Frontier molecular orbitals of **32** (top) and **31** (bottom) (B3LYP-D3/def2-TZVP).

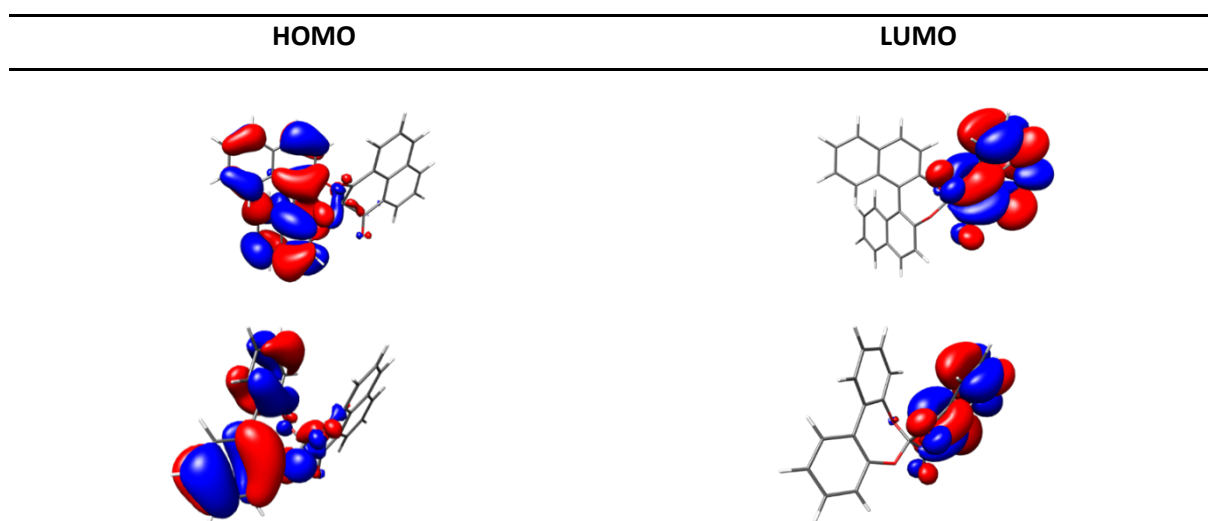



**Table S6:** Frontier molecular orbitals of **26** (top) and **27** (bottom) (B3LYP-D3/def2-TZVP).

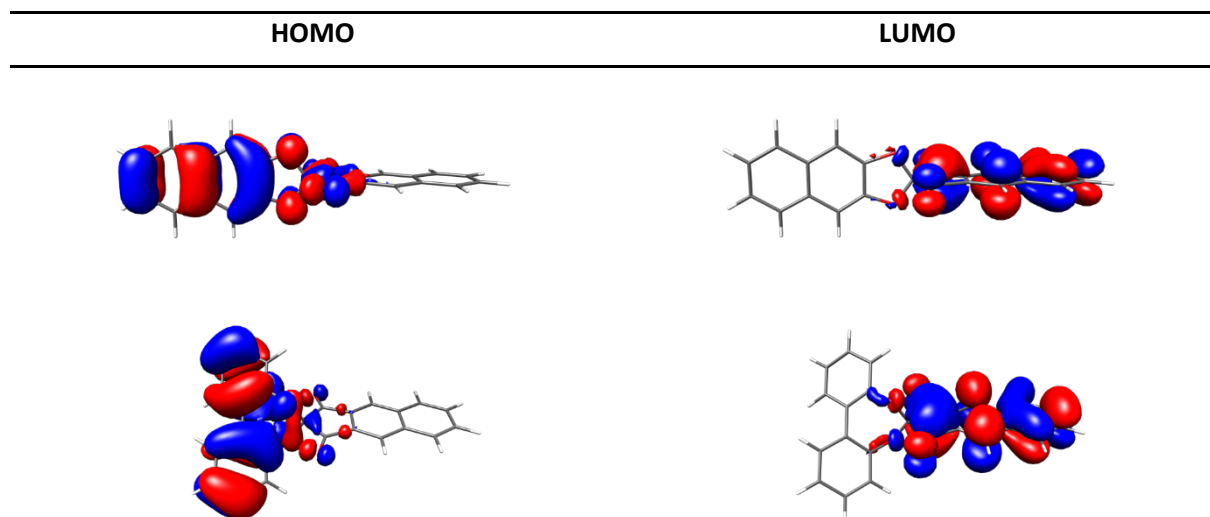

**Table S7:** Frontier molecular orbitals of **29** (B3LYP-D3/def2-TZVP).

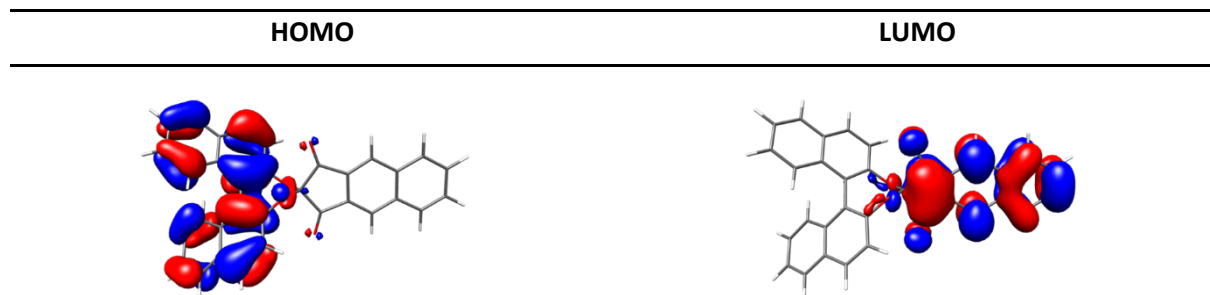

## 5.2 TDDFT Calculations

### 5.2.1 Charge Transfer Transitions

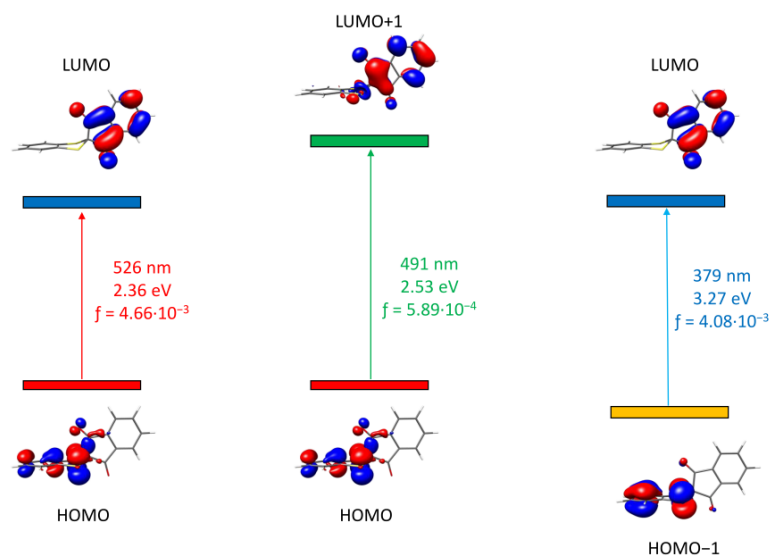

**Figure S18:** Calculated intramolecular charge transfer transition of **7** (B3LYP-D3/def2-TZVP).

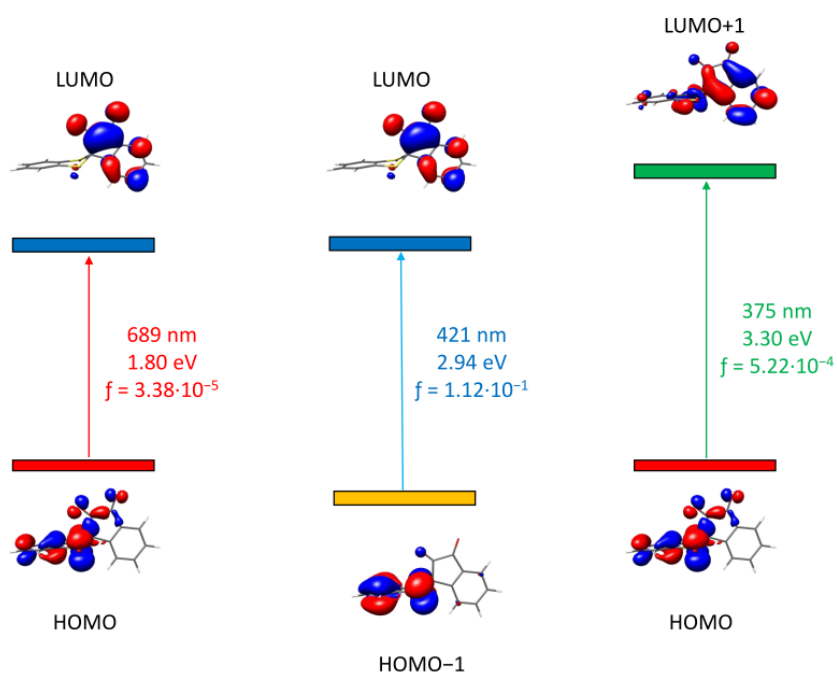

**Figure S19:** Calculated intramolecular charge transfer transition of **8** (B3LYP-D3/def2-TZVP).

## 5.2.2 Calculated Bandgaps

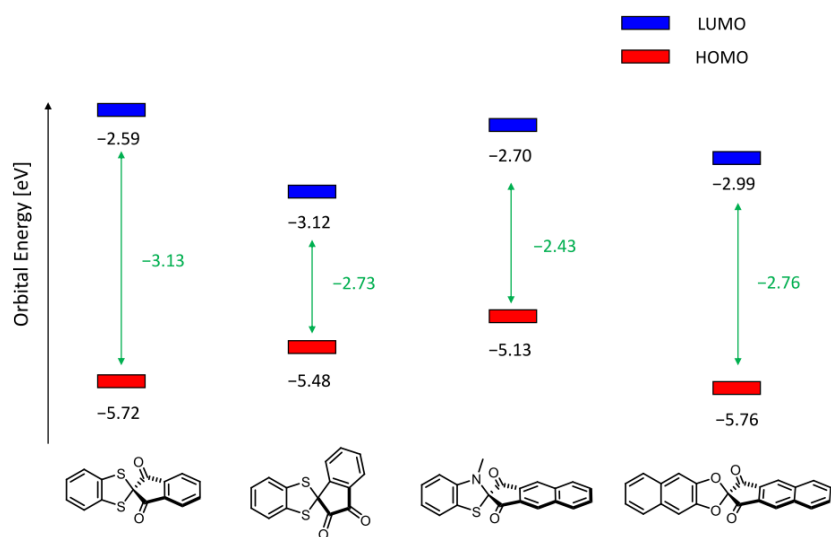

**Figure S20:** Calculated HOMO energy levels (red), LUMO energy levels (blue) and band gaps (green) in eV (B3LYP-D3/def2-TZVP).

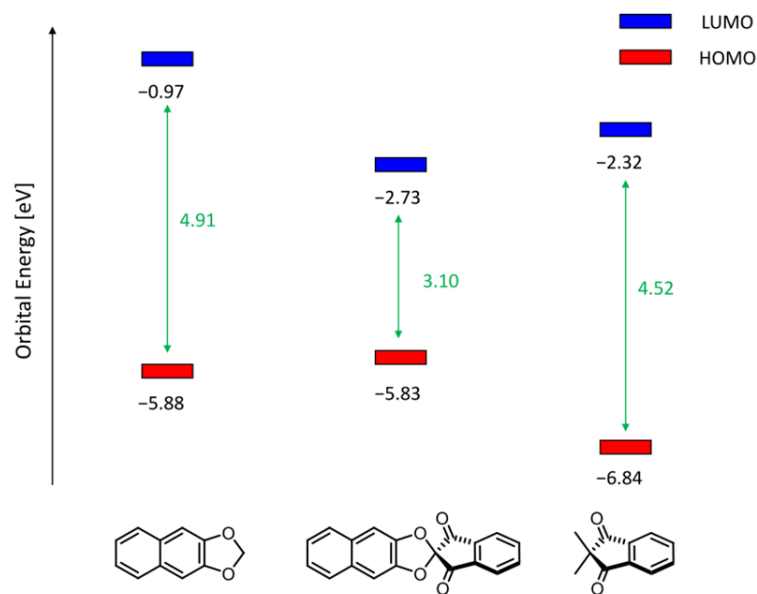

**Figure S21:** Calculated HOMO energy levels (red), LUMO energy levels (blue) and band gaps (green) in eV (B3LYP-D3/def2-TZVP).

**Table S8: Calculated Photophysical Properties.**

| Compound  | $E_{\text{HOMO}}$<br>[eV] | $E_{\text{LUMO}}$<br>[eV] | $E_g$ [eV] | $S_1$ [eV] | $T_1$ [eV] | $\Delta E_{\text{ST}}$ [eV] | Oscillator strength<br>$S_0 \rightarrow S_1$ |
|-----------|---------------------------|---------------------------|------------|------------|------------|-----------------------------|----------------------------------------------|
| <b>4</b>  | -5.13                     | -2.70                     | 2.43       | 1.75       | 1.64       | 0.11                        | $4.93 \cdot 10^{-03}$                        |
| <b>7</b>  | -5.84                     | -3.12                     | 2.73       | 1.80       | 1.49       | 0.31                        | $3.38 \cdot 10^{-05}$                        |
| <b>8</b>  | -5.72                     | -2.59                     | 3.13       | 2.36       | 2.22       | 0.14                        | $4.67 \cdot 10^{-04}$                        |
| <b>21</b> | -5.71                     | -2.67                     | 3.03       | 2.21       | 2.05       | 0.17                        | $1.30 \cdot 10^{-05}$                        |
| <b>22</b> | -5.84                     | -2.73                     | 3.10       | 2.33       | 2.15       | 0.18                        | $2.82 \cdot 10^{-06}$                        |
| <b>25</b> | -6.04                     | -2.49                     | 3.55       | 2.82       | 2.58       | 0.24                        | $5.38 \cdot 10^{-03}$                        |
| <b>23</b> | -5.74                     | -2.56                     | 3.19       | 2.40       | 2.22       | 0.18                        | $5.59 \cdot 10^{-03}$                        |
| <b>30</b> | -5.86                     | -2.69                     | 3.17       | 2.61       | 2.42       | 0.19                        | $8.79 \cdot 10^{-03}$                        |
| <b>32</b> | -5.71                     | -2.49                     | 3.22       | 2.76       | 2.47       | 0.28                        | $2.23 \cdot 10^{-03}$                        |
| <b>31</b> | -6.00                     | -2.50                     | 3.50       | 2.88       | 2.47       | 0.41                        | $6.10 \cdot 10^{-04}$                        |
| <b>26</b> | -5.76                     | -2.99                     | 2.76       | 2.07       | 1.94       | 0.13                        | $4.69 \cdot 10^{-07}$                        |
| <b>27</b> | -6.16                     | -2.75                     | 3.41       | 2.74       | 2.36       | 0.38                        | $2.12 \cdot 10^{-02}$                        |

### 5.2.3 Calculated Absorption Spectra

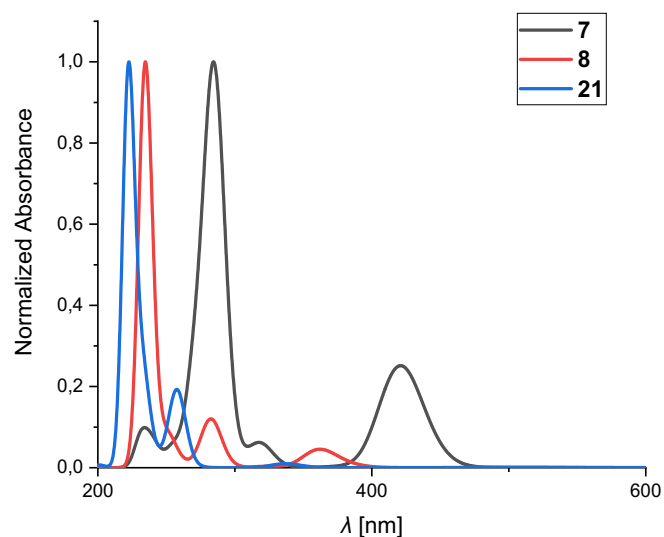

**Figure S22:** Calculated absorption spectra of **7**, **8**, and **21** (B3LYP-D3/def2-TZVP).

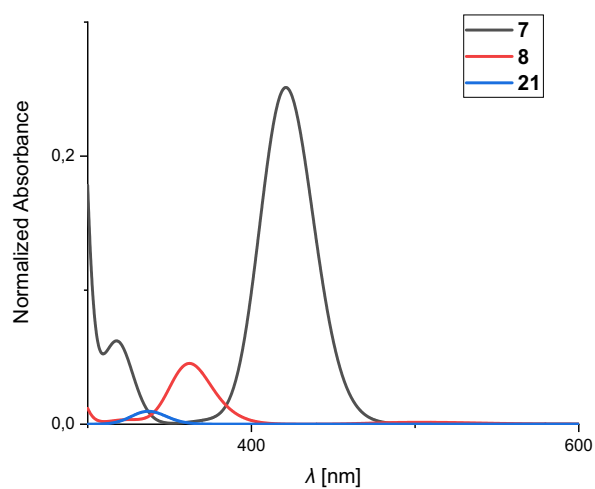

**Figure S23:** Calculated absorption spectra of **7**, **8**, and **21** (B3LYP-D3/def2-TZVP).

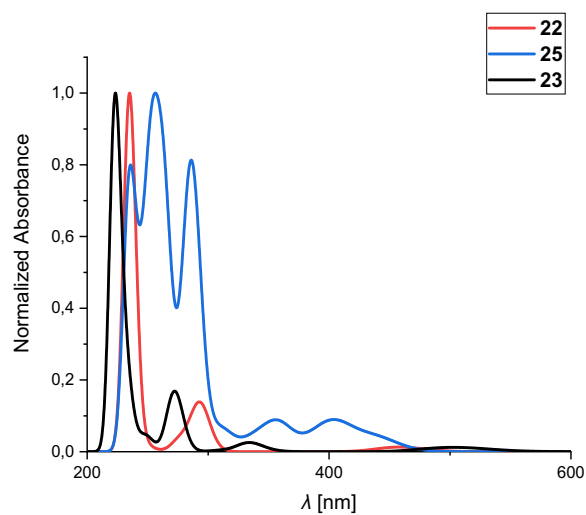

**Figure S24:** Calculated absorption spectra of **22**, **25**, and **23** (B3LYP-D3/def2-TZVP).

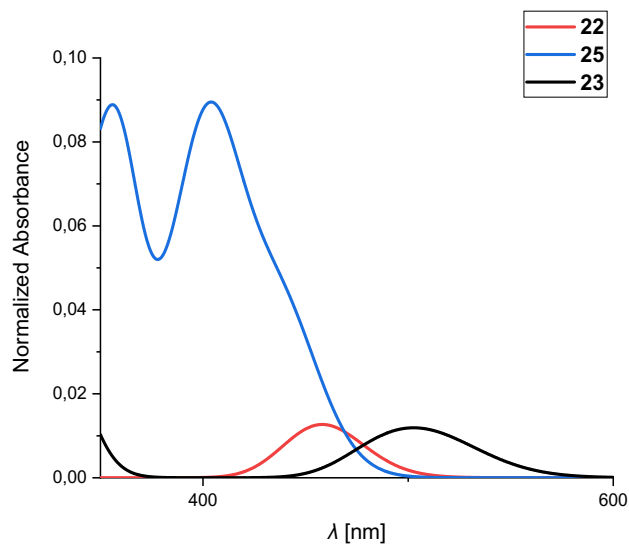

**Figure S25:** Calculated absorption spectra of **22**, **25**, and **23** (B3LYP-D3/def2-TZVP).

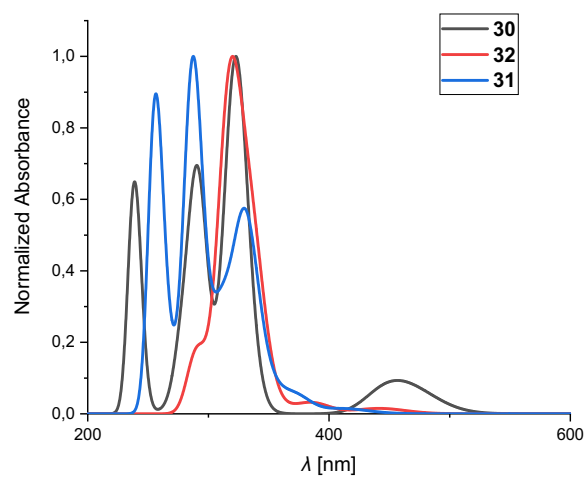

**Figure S26:** Calculated absorption spectra of **30**, **32**, and **31** (B3LYP-D3/def2-TZVP).

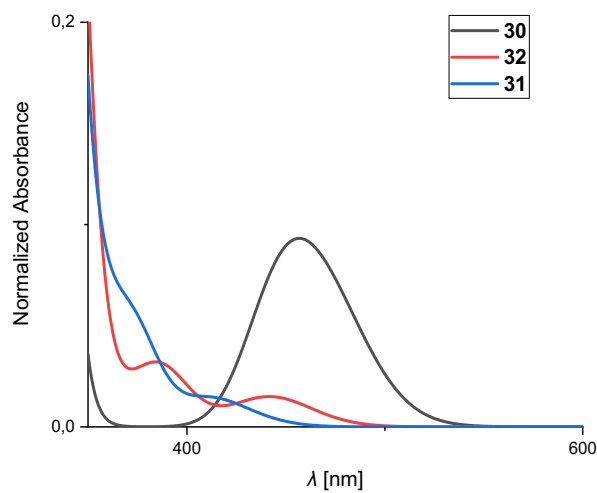

**Figure S27:** Calculated absorption spectra of **30**, **32**, and **31** (B3LYP-D3/def2-TZVP).

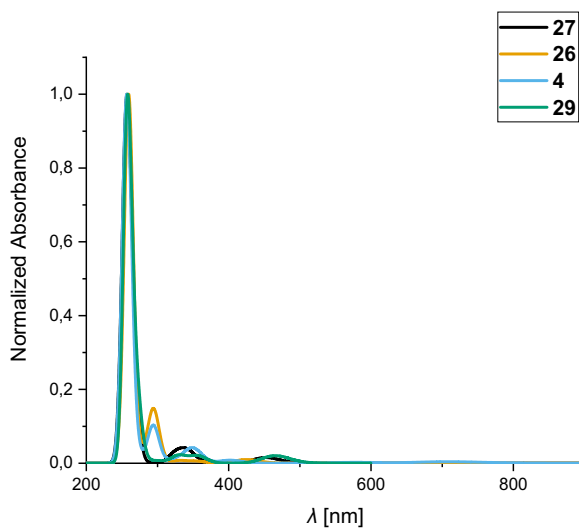

**Figure S28:** Calculated absorption spectra of **27**, **26**, **4** and **29** (B3LYP-D3/def2-TZVP).

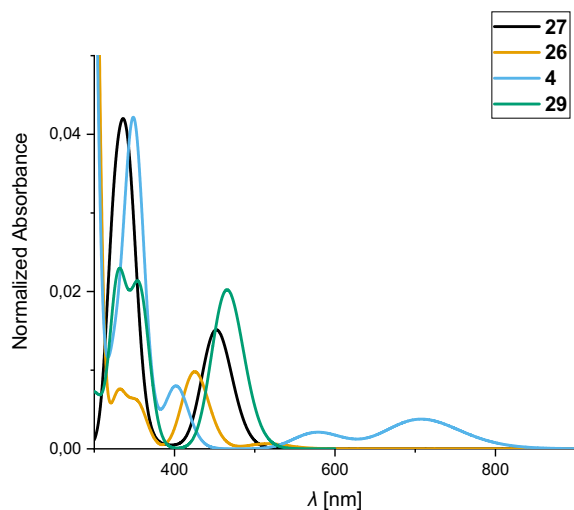

**Figure S29:** Calculated absorption spectra of **27**, **26**, **4** and **29** (B3LYP-D3/def2-TZVP).

#### 5.2.4 Calculated Circular Dichroism Spectra

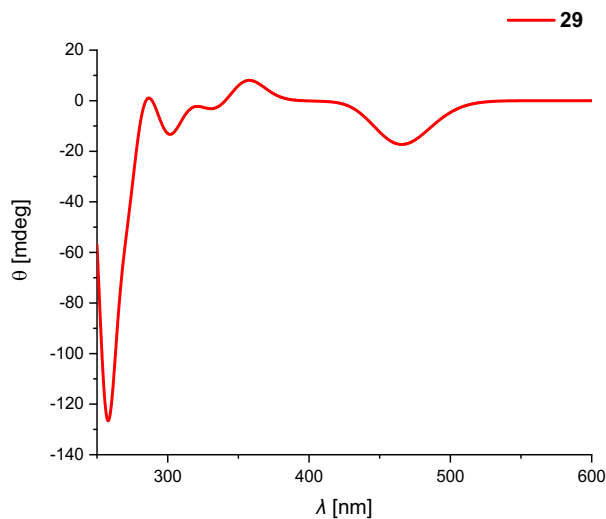

**Figure S30:** Calculated circular dichroism spectrum of **29** (B3LYP-D3/def2-TZVP).

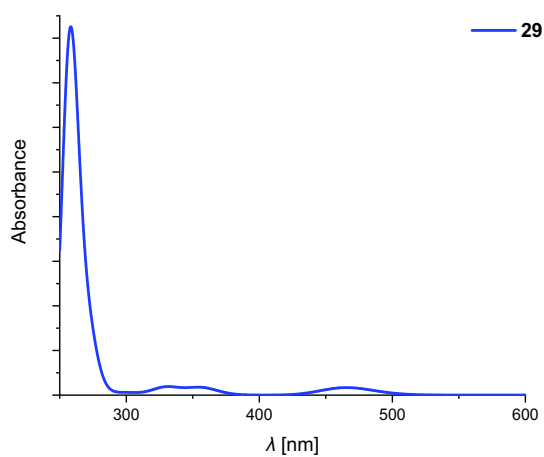

**Figure S31:** Calculated absorption spectrum of **29** (B3LYP-D3/def2-TZVP).

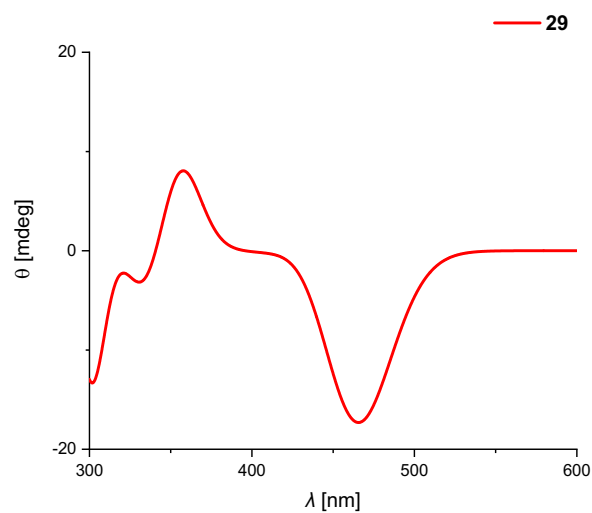

**Figure S32:** Calculated circular dichroism spectrum of **29** (B3LYP-D3/def2-TZVP).

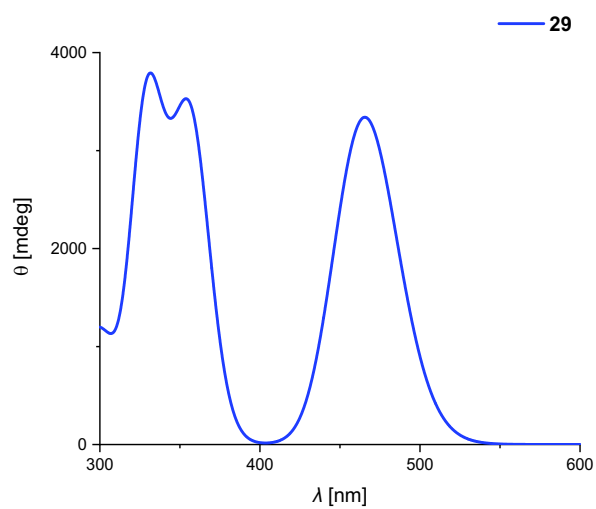

**Figure S33:** Calculated absorption spectrum of **29** (B3LYP-D3/def2-TZVP).



### 5.3 Total Energies and Zero-Point Vibrational Energies

**Table S9:** Total Energies and Zero-Point Vibrational Energies (B3LYP-D3/def2-TZVP).

| Compound  | Total Energy [hartrees] | Zero-Point Vibrational Energy [hartrees] |
|-----------|-------------------------|------------------------------------------|
| <b>4</b>  | -1373.1946904400        | 0.2882897                                |
| <b>8</b>  | -1523.0868647840        | 0.1949222                                |
| <b>7</b>  | -1523.0953571740        | 0.1952106                                |
| <b>21</b> | -877.1899304018         | 0.2013141                                |
| <b>22</b> | -1030.8096112940        | 0.2496693                                |
| <b>25</b> | -1108.2093358380        | 0.2852229                                |
| <b>23</b> | -1200.1428123670        | 0.1983521                                |
| <b>30</b> | -1184.4326368030        | 0.2985921                                |
| <b>32</b> | -1569.0673952810        | 0.4309591                                |
| <b>31</b> | -1261.8347526790        | 0.3341390                                |
| <b>26</b> | -1261.8314975000        | 0.2979319                                |
| <b>27</b> | -1184.4272581100        | 0.3335377                                |
| <b>29</b> | -1569.0617225000        | 0.4303727                                |

### 5.4 Cartesian Coordinates of the Calculated Structures

The Cartesian coordinates are listed in angstrom.

**Table S10:** Coordinates of the calculated structure of **4** (PBEh-3c/def2-mSVP).

|   | x          | y          | z          |   |            |            |            |
|---|------------|------------|------------|---|------------|------------|------------|
|   |            |            |            | C | -0.0317173 | 0.8873608  | -1.3057125 |
| N | -2.2473462 | 1.0950535  | -0.1267133 | C | -1.0879732 | 0.3029143  | -0.3550185 |
| C | -3.4011485 | 0.3505741  | 0.0184787  | C | -0.2820923 | -0.1244361 | 0.8809792  |
| C | -3.2941471 | -0.9532957 | -0.4713270 | O | -0.2421853 | 1.6107178  | -2.2367381 |
| S | -1.6903676 | -1.2583873 | -1.1277521 | O | -0.7258149 | -0.3179938 | 1.9780756  |
| C | -2.1008289 | 2.3707494  | 0.5262083  | H | -2.9098392 | 3.0350259  | 0.2228354  |
| C | -4.6033828 | 0.7751430  | 0.5594244  | H | -1.1746436 | 2.8455115  | 0.2083452  |
| C | -5.6843679 | -0.1034797 | 0.5781027  | H | -2.0990732 | 2.2939454  | 1.6177741  |
| C | -5.5726037 | -1.3882009 | 0.0789104  | H | -4.7093719 | 1.7699014  | 0.9704333  |
| C | -4.3586908 | -1.8243884 | -0.4506647 | H | -6.6226448 | 0.2291863  | 1.0014605  |
| C | 3.6244764  | -0.0403064 | -0.7688969 | H | -6.4184117 | -2.0609535 | 0.1058300  |
| C | 3.4779699  | -0.6467929 | 0.5148868  | H | -4.2553401 | -2.8317855 | -0.8315790 |
| C | 4.6257037  | -1.1622942 | 1.1599887  | H | 4.5151473  | -1.6228595 | 2.1336162  |
| C | 5.8541132  | -1.0840146 | 0.5689434  | H | 6.7240979  | -1.4825980 | 1.0732260  |
| C | 5.9987377  | -0.4853218 | -0.6997541 | H | 6.9780635  | -0.4305610 | -1.1557212 |
| C | 4.9116672  | 0.0228510  | -1.3510105 | H | 5.0225154  | 0.4822538  | -2.3251703 |
| C | 2.4940416  | 0.4876010  | -1.4282867 | H | 2.5970588  | 0.9583359  | -2.3984625 |
| C | 1.2731928  | 0.3924340  | -0.8228621 | H | 2.0839477  | -1.1664868 | 2.0951537  |
| C | 1.1281876  | -0.2089312 | 0.4459254  |   |            |            |            |
| C | 2.2030699  | -0.7164718 | 1.1170716  |   |            |            |            |

**Table S11:** Coordinates of the calculated structure of **8** (PBEh-3c/def2-mSVP).

|   | x          | y          | z          |   |            |            |            |
|---|------------|------------|------------|---|------------|------------|------------|
| S | -0.0214690 | -0.6486699 | 1.4689882  | C | 1.1494852  | 2.6740160  | 0.0007740  |
| O | 2.5551120  | 0.6884422  | -0.0020562 | C | -2.4676503 | 3.7830217  | 0.0004462  |
| C | 0.6808920  | -2.0620724 | 0.6965145  | H | -3.1020005 | 4.6590959  | 0.0011284  |
| C | 1.1703353  | -3.1505841 | 1.3948759  | C | -3.0485869 | 2.5130774  | 0.0001340  |
| H | 1.1897566  | -3.1427436 | 2.4766333  | H | -4.1269244 | 2.4243944  | 0.0005515  |
| O | 1.9666578  | 3.5494965  | 0.0033480  | C | -2.2711737 | 1.3662856  | -0.0004536 |
| C | 1.6468319  | -4.2514164 | 0.6928061  | H | -2.7232448 | 0.3833612  | -0.0005691 |
| H | 2.0327023  | -5.1030579 | 1.2361836  | C | -0.8935018 | 1.5088961  | -0.0006414 |
| C | 0.1296129  | 0.4119012  | -0.0011163 | S | -0.0218909 | -0.6495307 | -1.4704955 |
| C | 1.4650558  | 1.1644876  | -0.0011277 | C | 0.6809478  | -2.0624525 | -0.6974108 |
| C | -1.0932287 | 3.9235703  | -0.0000269 | C | 1.1703517  | -3.1515611 | -1.3949128 |
| H | -0.6244033 | 4.8987261  | -0.0000823 | H | 1.1897846  | -3.1444709 | -2.4766832 |
| C | -0.3132672 | 2.7733678  | -0.0001805 | C | 1.6466340  | -4.2519183 | -0.6919628 |
|   |            |            |            | H | 2.0331816  | -5.1036621 | -1.2346646 |

**Table S12:** Coordinates of the calculated structure of **7** (PBEh-3c/def2-mSVP).

|   | x          | y          | z          |   |            |            |            |
|---|------------|------------|------------|---|------------|------------|------------|
| S | -0.1689884 | 1.8982281  | -0.8563658 | C | -1.2897180 | -1.2865065 | 2.9697346  |
| S | 1.5551044  | -0.4815977 | -0.9255561 | H | -2.1213318 | -1.8839818 | 2.6213850  |
| O | 2.0669284  | 1.7253451  | 1.4362917  | C | -0.5365316 | -0.5351612 | 2.0810845  |
| O | -1.5813570 | -0.8835180 | -0.0454744 | C | -0.7136852 | -0.3975231 | 0.6198118  |
| C | 0.4256032  | 0.4938392  | 0.1133090  | C | 0.7328445  | -0.0789592 | -2.4247156 |
| C | 1.1603091  | 0.9473119  | 1.3874958  | C | 0.9021941  | -0.7857946 | -3.6013660 |
| C | 0.5298898  | 0.2385648  | 2.5177483  | H | 1.5216763  | -1.6725805 | -3.6229612 |
| C | 0.8817829  | 0.2881482  | 3.8584845  | C | 0.2613631  | -0.3495107 | -4.7546839 |
| H | 1.7128467  | 0.8955916  | 4.1906780  | H | 0.3892159  | -0.9011133 | -5.6759687 |
| C | 0.1340275  | -0.4637342 | 4.7486385  | C | -0.5490613 | 0.7732134  | -4.7224340 |
| H | 0.3805103  | -0.4503931 | 5.8019289  | H | -1.0570347 | 1.1020897  | -5.6186747 |
| C | -0.9400406 | -1.2423188 | 4.3089700  | C | -0.7304419 | 1.4753880  | -3.5370674 |
| H | -1.5056384 | -1.8166420 | 5.0305982  | H | -1.3780806 | 2.3416108  | -3.5092504 |
|   |            |            |            | C | -0.0823865 | 1.0500042  | -2.3916407 |

**Table S13:** Coordinates of the calculated structure of **21** (PBEh-3c/def2-mSVP).

|   | x          | y          | z          |   |            |            |            |
|---|------------|------------|------------|---|------------|------------|------------|
| O | 1.4687752  | 0.0887844  | 0.2507781  | C | -2.2688739 | -0.0273646 | -4.0204723 |
| C | 0.0736003  | 0.0808684  | 0.1104362  | H | -2.7343126 | 0.3302846  | -4.9292428 |
| O | -0.5031050 | 0.3467756  | 1.3607135  | C | -1.6654637 | 0.8710801  | -3.1581164 |
| C | -0.4172210 | -1.2743374 | -0.4467129 | H | -1.6465435 | 1.9314588  | -3.3708661 |
| O | -0.2561968 | -2.3353408 | 0.0833805  | C | -1.0804788 | 0.3700443  | -2.0039650 |
| C | -1.0998369 | -0.9933828 | -1.7221620 | C | -0.3832789 | 1.1160250  | -0.9411671 |
| C | -1.7046009 | -1.8950377 | -2.5860900 | C | 0.5262140  | 0.4433755  | 2.2471393  |
| H | -1.7157034 | -2.9528312 | -2.3603234 | C | 0.4730593  | 0.6630054  | 3.5982058  |
| O | -0.1909209 | 2.2952184  | -0.8749098 | H | -0.4664580 | 0.7850413  | 4.1181361  |
| C | -2.2882319 | -1.3963414 | -3.7374192 | C | 1.6993122  | 0.7199631  | 4.2698162  |
| H | -2.7682967 | -2.0722907 | -4.4324288 | H | 1.7053066  | 0.8900968  | 5.3375132  |
|   |            |            |            | C | 2.8974256  | 0.5622840  | 3.5955180  |

|   |           |           |           |   |           |           |           |
|---|-----------|-----------|-----------|---|-----------|-----------|-----------|
| H | 3.8288578 | 0.6104039 | 4.1424075 | H | 3.8634364 | 0.2160037 | 1.6811797 |
| C | 2.9316697 | 0.3397796 | 2.2144634 | C | 1.7218656 | 0.2864336 | 1.5741884 |

**Table S14:** Coordinates of the calculated structure of **22** (PBEh-3c/def2-mSVP).

|   |            |            |            |   |            |            |            |
|---|------------|------------|------------|---|------------|------------|------------|
|   | x          | y          | z          | C | 0.4733256  | -0.9724442 | -2.2933601 |
| C | -3.1404240 | 3.9796940  | 2.9994322  | O | -0.7629058 | 0.4728591  | -0.7595080 |
| C | -3.9139088 | 2.8545307  | 3.3000119  | O | 0.5205366  | 0.0799199  | 1.0761790  |
| C | -3.5742204 | 1.6044680  | 2.8133308  | C | 3.4878946  | -2.9777453 | -1.3402962 |
| C | -2.4418093 | 1.5037030  | 2.0180609  | C | 3.7840005  | -3.5894164 | -2.5292511 |
| C | -1.6709077 | 2.6242452  | 1.7191467  | C | 2.9918608  | -3.3465838 | -3.6628684 |
| C | -2.0106919 | 3.8780438  | 2.2067454  | C | 1.9201034  | -2.4977894 | -3.5831916 |
| C | -1.8780816 | 0.2968451  | 1.3885706  | H | -3.4334896 | 4.9427291  | 3.3957075  |
| C | -0.6210930 | 0.7417823  | 0.6082820  | H | -4.7903380 | 2.9679394  | 3.9239968  |
| C | -0.5266705 | 2.2619843  | 0.8643476  | H | -4.1678689 | 0.7295508  | 3.0415352  |
| O | -2.2875271 | -0.8261012 | 1.4488635  | H | -1.4072149 | 4.7441571  | 1.9708762  |
| O | 0.3285638  | 2.9794629  | 0.4339912  | H | 2.6897009  | -1.6468629 | 0.8900401  |
| C | 0.2239489  | -0.3974558 | -1.0963176 | H | -0.1424609 | -0.7798429 | -3.1613484 |
| C | 1.0158520  | -0.6398442 | 0.0364063  | H | 4.0994113  | -3.1651794 | -0.4660833 |
| C | 2.0848930  | -1.4657665 | 0.0119242  | H | 4.6292759  | -4.2612087 | -2.5965937 |
| C | 2.3918984  | -2.0991858 | -1.2265024 | H | 3.2297756  | -3.8315007 | -4.6002080 |
| C | 1.5896807  | -1.8536309 | -2.3741003 | H | 1.3088905  | -2.3113569 | -4.4578191 |

**Table S15:** Coordinates of the calculated structure of **25** (PBEh-3c/def2-mSVP).

|   |            |            |            |   |            |            |            |
|---|------------|------------|------------|---|------------|------------|------------|
| C | -4.6598836 | 0.3285467  | 1.2384193  | C | 2.9669941  | -1.9123611 | -2.6963495 |
| C | -3.4013536 | 0.5391913  | 1.7579989  | C | 4.0672769  | -1.1414727 | -3.0321493 |
| C | -2.2227304 | 0.2438991  | 1.0568493  | C | 4.1077048  | 0.2238222  | -2.7371854 |
| C | -2.3772848 | -0.3320827 | -0.2115825 | C | 3.0481034  | 0.8480368  | -2.1009638 |
| C | -3.6490336 | -0.5427722 | -0.7427124 | O | 0.1998783  | -2.9600635 | -1.8507943 |
| C | -4.7828514 | -0.2111582 | -0.0344105 | O | 0.3174701  | 1.6173477  | -0.9265813 |
| C | -0.8326126 | 1.6033274  | 2.6292570  | H | -5.5352883 | 0.5695613  | 1.8253728  |
| C | 0.3358372  | 1.8437957  | 3.3295262  | H | -3.3167362 | 0.9253346  | 2.7646243  |
| C | 1.4455665  | 1.0361989  | 3.1305596  | H | -3.7229297 | -0.9839990 | -1.7277197 |
| C | 1.3841943  | 0.0154941  | 2.1979761  | H | -5.7577089 | -0.3893188 | -0.4679118 |
| C | 0.2069216  | -0.2077837 | 1.5053088  | H | -1.6756268 | 2.2644014  | 2.7772856  |
| C | -0.9399792 | 0.5497204  | 1.7180979  | H | 0.3803202  | 2.6685372  | 4.0277652  |
| O | 0.1969868  | -1.2056034 | 0.5674521  | H | 2.3603498  | 1.2132354  | 3.6797615  |
| O | -1.3959113 | -0.7380606 | -1.0590161 | H | 2.2408651  | -0.6151702 | 1.9988410  |
| C | -0.0655304 | -0.7982377 | -0.7398252 | H | 2.9252431  | -2.9677276 | -2.9298270 |
| C | 0.6292632  | -1.8711071 | -1.6119084 | H | 4.9089753  | -1.5979432 | -3.5357634 |
| C | 0.6995505  | 0.4963471  | -1.1039029 | H | 4.9803108  | 0.7989275  | -3.0169824 |
| C | 1.9126223  | -1.2875067 | -2.0482572 | H | 3.0675841  | 1.9060025  | -1.8764677 |
| C | 1.9534423  | 0.0706414  | -1.7547849 |   |            |            |            |

**Table S16:** Coordinates of the calculated structure of **23** (PBEh-3c/def2-mSVP).

|   |            |           |           |   |            |           |           |
|---|------------|-----------|-----------|---|------------|-----------|-----------|
|   | x          | y         | z         | C | -0.5313938 | 2.5837293 | 2.7624178 |
| C | -2.9257750 | 2.5078548 | 2.4088049 | C | -0.3868986 | 1.7550126 | 1.6603556 |
| C | -1.8148226 | 2.9510056 | 3.1307474 | C | -1.4937291 | 1.3140723 | 0.9411809 |

|   |            |            |            |   |            |            |            |
|---|------------|------------|------------|---|------------|------------|------------|
| C | -2.7783106 | 1.6878865  | 1.3022889  | C | 1.3796970  | -1.0154995 | -1.6506295 |
| C | 0.8606700  | 1.2405012  | 1.0592486  | C | 1.0830416  | -2.0698000 | -0.7970018 |
| C | 0.4264181  | 0.2031300  | 0.0173264  | O | 1.1885240  | 0.2255853  | -1.1360256 |
| C | -1.0614887 | 0.4921989  | -0.2096963 | H | -3.9148747 | 2.8170069  | 2.7195691  |
| O | 1.9857213  | 1.5516533  | 1.3170870  | H | -1.9639867 | 3.5941210  | 3.9877903  |
| O | -1.7180745 | 0.1298829  | -1.1423570 | H | 0.3340093  | 2.9284510  | 3.3122355  |
| S | 0.5451969  | -1.4828864 | 0.7679239  | H | -3.6331770 | 1.3480343  | 0.7333638  |
| C | 1.2701643  | -3.3760429 | -1.2014857 | H | 1.0394306  | -4.1996898 | -0.5398259 |
| C | 1.7615399  | -3.6115543 | -2.4821933 | H | 1.9102619  | -4.6291525 | -2.8159093 |
| C | 2.0552261  | -2.5539815 | -3.3276843 | H | 2.4316936  | -2.7486731 | -4.3225483 |
| C | 1.8647967  | -1.2368613 | -2.9197264 | H | 2.0861401  | -0.4059845 | -3.5752567 |

**Table S17:** Coordinates of the calculated structure of **30** (PBEh-3c/def2-mSVP).

|   |            |            |            |   |            |            |            |
|---|------------|------------|------------|---|------------|------------|------------|
|   | x          | y          | z          | C | 1.5501563  | 3.7222713  | -0.8836752 |
| C | -3.5350200 | -2.1664371 | 0.0509325  | C | 0.7071835  | 3.3674862  | 0.2076143  |
| C | -3.7949691 | -3.5429806 | 0.0012315  | C | 2.7284406  | 3.1406607  | -2.9361997 |
| C | -2.8880612 | -4.4279019 | 0.5164728  | C | 3.2168062  | 4.4166113  | -3.0276999 |
| C | -1.6866943 | -3.9775682 | 1.1049453  | C | 2.8828946  | 5.3701808  | -2.0522655 |
| C | -1.4108576 | -2.5875308 | 1.1417331  | C | 2.0682703  | 5.0274185  | -1.0064012 |
| C | -2.3673441 | -1.6907414 | 0.5968739  | O | -0.5567851 | 1.5153971  | 1.1724784  |
| C | -0.7585354 | -4.8809292 | 1.6663742  | O | -0.0154673 | -0.0352149 | -0.4114105 |
| C | 0.3887107  | -4.4331879 | 2.2616317  | H | -4.2537133 | -1.4641704 | -0.3501674 |
| C | 0.6562301  | -3.0583091 | 2.3187582  | H | -4.7139023 | -3.8996966 | -0.4430689 |
| C | -0.2128007 | -2.1499813 | 1.7648110  | H | -3.0860824 | -5.4922625 | 0.4842383  |
| C | -2.1269184 | -0.2350770 | 0.6269170  | H | -0.9724502 | -5.9418628 | 1.6241133  |
| C | 0.1013413  | -0.7105239 | 1.8405185  | H | 1.0900672  | -5.1346534 | 2.6919120  |
| C | -0.6644737 | 0.1734485  | 0.8443437  | H | 1.5587998  | -2.7004462 | 2.7961823  |
| O | -2.9738204 | 0.5928546  | 0.4365085  | H | 1.6357919  | 0.6873174  | -2.5223918 |
| O | 0.9405369  | -0.2389685 | 2.5572261  | H | 0.4462667  | 4.0948216  | 0.9642259  |
| C | 0.2553804  | 2.0946235  | 0.2551894  | H | 2.9860404  | 2.4053170  | -3.6887706 |
| C | 0.5886647  | 1.1417840  | -0.7211643 | H | 3.8609752  | 4.6920654  | -3.8520612 |
| C | 1.3847801  | 1.4286165  | -1.7757508 | H | 3.2708949  | 6.3771675  | -2.1285544 |
| C | 1.8882164  | 2.7571396  | -1.8714669 | H | 1.8114476  | 5.7632622  | -0.2541836 |

**Table S18:** Coordinates of the calculated structure of **32** (PBEh-3c/def2-mSVP).

|   |            |            |            |   |            |            |            |
|---|------------|------------|------------|---|------------|------------|------------|
|   | x          | y          | z          | C | -2.8032861 | -0.5898382 | -0.2314966 |
| C | -4.3069730 | -0.1608903 | -2.1396481 | C | -1.0329934 | -2.3903678 | -0.4843439 |
| C | -4.7336859 | -0.3958969 | -3.4555593 | C | -1.3474260 | -0.9865553 | 0.0665634  |
| C | -4.1014097 | -1.3346081 | -4.2235868 | O | -3.5004038 | -0.0885377 | 0.6069525  |
| C | -3.0176791 | -2.0814528 | -3.7120140 | O | -0.4029025 | -3.1970798 | 0.1382975  |
| C | -2.5695542 | -1.8302052 | -2.3923076 | C | -1.6417458 | 0.6676194  | 3.0119667  |
| C | -3.2392389 | -0.8479826 | -1.6188734 | C | -0.7707370 | 0.2225936  | 2.0029315  |
| C | -2.3746531 | -3.0778368 | -4.4783812 | C | 0.3701167  | 0.9105065  | 1.6646822  |
| C | -1.3475705 | -3.8139824 | -3.9545436 | C | 0.5967015  | 2.1880250  | 2.2593253  |
| C | -0.9189902 | -3.5851882 | -2.6380467 | C | -0.2748826 | 2.6385236  | 3.2843050  |
| C | -1.5039569 | -2.6081035 | -1.8714462 | C | -1.3765632 | 1.8369531  | 3.6583488  |

|   |            |            |            |   |            |            |            |
|---|------------|------------|------------|---|------------|------------|------------|
| C | 1.6370198  | 3.0516309  | 1.8425731  | H | -5.5655430 | 0.1662226  | -3.8571486 |
| C | 1.8269529  | 4.2663262  | 2.4410174  | H | -4.4323190 | -1.5216982 | -5.2377797 |
| C | 0.9892411  | 4.6890914  | 3.4894051  | H | -2.7132971 | -3.2577930 | -5.4913296 |
| C | -0.0427232 | 3.8914083  | 3.8942275  | H | -0.8665810 | -4.5784555 | -4.5491982 |
| O | -1.0458307 | -0.9779085 | 1.4062782  | H | -0.1154661 | -4.1755947 | -2.2175704 |
| C | 0.7455225  | -0.1195158 | -0.5202507 | H | -2.5078558 | 0.0708527  | 3.2586822  |
| C | 1.5322176  | -0.6134371 | -1.5727330 | H | -2.0350335 | 2.1821489  | 4.4456907  |
| C | 2.8841466  | -0.6952003 | -1.4115509 | H | 2.2818358  | 2.7560851  | 1.0270799  |
| C | 3.4871281  | -0.3417973 | -0.1844754 | H | 2.6252214  | 4.9116334  | 2.0989627  |
| C | 2.6809951  | 0.1503620  | 0.8758858  | H | 1.1550320  | 5.6491632  | 3.9596748  |
| C | 1.2815736  | 0.3208335  | 0.6639336  | H | -0.7091820 | 4.2163231  | 4.6840018  |
| C | 4.8782720  | -0.4935552 | 0.0138676  | H | 1.0553214  | -0.9098035 | -2.4978812 |
| C | 5.4502120  | -0.2046026 | 1.2192675  | H | 3.5069437  | -1.0606819 | -2.2184731 |
| C | 4.6460588  | 0.2381635  | 2.2864223  | H | 5.4843045  | -0.8574974 | -0.8069033 |
| C | 3.3004693  | 0.4110349  | 2.1208601  | H | 6.5151816  | -0.3299005 | 1.3623958  |
| O | -0.6141117 | -0.0561225 | -0.6971793 | H | 5.0960752  | 0.4362520  | 3.2501191  |
| H | -4.8119226 | 0.5755140  | -1.5286058 | H | 2.6979745  | 0.7348228  | 2.9576086  |

**Table S19:** Coordinates of the calculated structure of **31** (PBEh-3c/def2-mSVP).

|   |            |            |            |   |            |            |            |
|---|------------|------------|------------|---|------------|------------|------------|
|   | x          | y          | z          | O | -0.3388418 | 1.8007709  | 1.6040656  |
| C | -4.0665419 | -0.1720002 | -0.7039156 | C | 0.9182153  | 0.6045783  | -0.9415233 |
| C | -4.6199035 | -1.2415866 | -1.4254225 | C | 0.9878282  | -0.2871847 | -2.0000827 |
| C | -3.9315500 | -2.4171017 | -1.5463108 | C | 2.2049321  | -0.8417142 | -2.3500383 |
| C | -2.6624276 | -2.5787610 | -0.9480869 | C | 3.3341134  | -0.5258163 | -1.6076183 |
| C | -2.0941187 | -1.4948332 | -0.2358645 | C | 3.2473323  | 0.3704837  | -0.5585839 |
| C | -2.8243908 | -0.2830111 | -0.1317697 | C | 2.0416547  | 0.9924083  | -0.2159085 |
| C | -1.9487299 | -3.7943483 | -1.0312531 | O | -0.3149181 | 1.0886341  | -0.5999371 |
| C | -0.7374384 | -3.9441628 | -0.4125105 | H | -4.6144989 | 0.7555837  | -0.6040282 |
| C | -0.1857026 | -2.8822294 | 0.3194022  | H | -5.5936956 | -1.1312440 | -1.8823784 |
| C | -0.8385862 | -1.6780589 | 0.3963617  | H | -4.3588271 | -3.2450351 | -2.0986726 |
| C | -2.2565623 | 0.8612643  | 0.6156027  | H | -2.3805840 | -4.6161339 | -1.5892761 |
| C | -0.2458834 | -0.5652490 | 1.1649444  | H | -0.2035311 | -4.8820073 | -0.4809206 |
| C | -0.7164544 | 0.8338836  | 0.7204045  | H | 0.7693150  | -2.9992002 | 0.8140379  |
| O | -2.9062907 | 1.7676362  | 1.0501620  | H | 0.1342634  | 3.5401522  | 3.2316558  |
| O | 0.5380835  | -0.7084354 | 2.0616516  | H | 4.0022939  | 2.6334424  | 0.3686411  |
| C | 1.0039975  | 3.3385192  | 2.6207687  | H | 4.1783804  | 4.3493694  | 2.0831450  |
| C | 0.9008901  | 2.3494826  | 1.6432580  | H | 2.2218858  | 4.8132163  | 3.5623086  |
| C | 1.9988854  | 2.0355802  | 0.8293156  | H | 0.0802167  | -0.5424910 | -2.5312655 |
| C | 3.1585159  | 2.8021138  | 1.0234070  | H | 2.2656299  | -1.5363263 | -3.1767807 |
| C | 3.2617141  | 3.7848787  | 1.9830432  | H | 4.2862403  | -0.9821755 | -1.8424626 |
| C | 2.1703819  | 4.0480872  | 2.7994464  | H | 4.1347072  | 0.5790208  | 0.0229882  |

**Table S20:** Coordinates of the calculated structure of **26** (PBEh-3c/def2-mSVP).

|   |           |            |            |   |           |            |            |
|---|-----------|------------|------------|---|-----------|------------|------------|
|   | x         | y          | z          | C | 3.3318636 | -0.5012778 | -1.4114530 |
| C | 2.2488719 | -0.0585736 | 0.7014713  | C | 4.5634853 | -0.5948900 | -0.7018308 |
| C | 2.2200403 | -0.2379286 | -0.6900973 | C | 4.5927065 | -0.4130431 | 0.7077616  |

|   |            |            |            |   |            |            |            |
|---|------------|------------|------------|---|------------|------------|------------|
| C | 3.3905251  | -0.1361027 | 1.4200501  | C | -0.6986457 | 1.4016049  | -0.1371643 |
| C | 5.7703213  | -0.8702914 | -1.3753806 | C | 0.1477918  | 0.1168682  | 0.0155610  |
| C | 6.9552467  | -0.9635204 | -0.6950702 | C | -0.8879292 | -1.0201519 | 0.1784549  |
| C | 6.9841464  | -0.7838006 | 0.6971560  | O | -0.6144083 | -2.1753799 | 0.3353727  |
| C | 5.8274705  | -0.5148071 | 1.3793084  | O | -0.2496789 | 2.5027549  | -0.2743939 |
| O | 0.9871206  | 0.1956367  | 1.1337307  | H | 3.3003363  | -0.6380205 | -2.4838470 |
| O | 0.9406207  | -0.0948475 | -1.1210958 | H | 3.4034617  | 0.0037296  | 2.4924113  |
| C | -7.0145017 | -0.0317870 | 0.0647444  | H | 5.7484588  | -1.0092925 | -2.4494114 |
| C | -6.9055429 | 1.3631419  | -0.1166361 | H | 7.8712418  | -1.1761920 | -1.2299760 |
| C | -5.6785642 | 1.9558114  | -0.1968005 | H | 7.9223423  | -0.8584212 | 1.2306256  |
| C | -4.4960061 | 1.1859443  | -0.0998602 | H | 5.8501910  | -0.3766452 | 2.4534410  |
| C | -4.6063680 | -0.2260610 | 0.0837607  | H | -7.9938774 | -0.4866442 | 0.1266613  |
| C | -5.8942140 | -0.8054543 | 0.1622295  | H | -7.8025871 | 1.9627739  | -0.1919447 |
| C | -3.2223508 | 1.7850718  | -0.1805790 | H | -5.5953815 | 3.0262676  | -0.3359325 |
| C | -2.1116390 | 0.9940897  | -0.0808665 | H | -5.9780907 | -1.8758644 | 0.3014077  |
| C | -2.2209762 | -0.4020430 | 0.1008438  | H | -3.1293587 | 2.8553140  | -0.3194262 |
| C | -3.4410460 | -1.0131940 | 0.1834694  | H | -3.5150763 | -2.0847751 | 0.3233045  |

**Table S21:** Coordinates of the calculated structure of **27** (PBEh-3c/def2-mSVP).

|   |            |            |            |   |            |            |            |
|---|------------|------------|------------|---|------------|------------|------------|
|   | x          | y          | z          | C | 0.6798448  | 0.7312470  | 1.6968342  |
| C | -0.6918049 | 1.1430734  | -3.4457136 | C | 1.7097769  | 0.6462269  | 0.7387042  |
| C | -1.2196667 | 0.3042270  | -2.4806240 | C | 2.9917573  | 1.0122744  | 1.0394703  |
| C | -1.9582610 | -0.8267689 | -2.8236178 | C | -0.6021495 | 0.2913560  | 1.1184363  |
| C | -2.1441934 | -1.0995655 | -4.1765732 | C | -0.3228988 | -0.1442269 | -0.3393442 |
| C | -1.6204331 | -0.2679742 | -5.1516903 | C | 1.1889838  | 0.1187697  | -0.5347691 |
| C | -0.8972584 | 0.8576645  | -4.7854016 | O | 1.7954421  | -0.0539379 | -1.5536974 |
| O | -1.1008965 | 0.6552265  | -1.1590499 | O | -1.6677606 | 0.2408119  | 1.6639851  |
| C | -1.8051667 | -1.9650251 | -0.6224689 | H | -0.1304217 | 2.0166828  | -3.1432185 |
| C | -2.3083256 | -2.7906178 | 0.3669556  | H | -2.6923793 | -1.9875844 | -4.4647275 |
| C | -3.5677030 | -3.3475300 | 0.2170631  | H | -1.7730720 | -0.5006250 | -6.1968569 |
| C | -4.3186946 | -3.0688520 | -0.9153911 | H | -0.4832351 | 1.5101318  | -5.5422719 |
| C | -3.8038868 | -2.2416288 | -1.8990766 | H | -1.7095306 | -2.9982350 | 1.2434529  |
| C | -2.5364185 | -1.6784263 | -1.7738087 | H | -3.9650014 | -3.9911167 | 0.9903197  |
| O | -0.5164686 | -1.5058764 | -0.5121654 | H | -5.3071116 | -3.4925197 | -1.0308764 |
| C | 4.8517210  | 2.3296734  | 3.9652988  | H | -4.3990806 | -2.0108276 | -2.7734504 |
| C | 3.8199298  | 2.4186836  | 4.9232396  | H | 5.8568295  | 2.6249699  | 4.2346646  |
| C | 2.5453836  | 2.0504219  | 4.6017311  | H | 4.0445452  | 2.7813883  | 5.9172150  |
| C | 2.2346746  | 1.5732704  | 3.3070171  | H | 1.7537027  | 2.1188487  | 5.3371538  |
| C | 3.2788461  | 1.4840414  | 2.3371690  | H | 5.3793842  | 1.8062920  | 1.9707518  |
| C | 4.5873335  | 1.8744731  | 2.7058017  | H | 0.1235967  | 1.2535164  | 3.6904051  |
| C | 0.9227649  | 1.1872835  | 2.9621229  | H | 3.7773022  | 0.9407840  | 0.2970015  |

**Table S22:** Coordinates of the calculated structure of **29** (PBEh-3c/def2-mSVP).

|   |            |            |           |   |           |            |           |
|---|------------|------------|-----------|---|-----------|------------|-----------|
|   | x          | y          | z         | C | 0.2041357 | -0.6751785 | 8.0454748 |
| O | -1.1369089 | -0.2640379 | 0.1570443 | H | 0.3590217 | -1.1857163 | 8.9864136 |
| O | 0.6604843  | -2.2746472 | 1.5109301 | C | 0.4031263 | -1.3365425 | 6.8680436 |

|   |            |            |            |   |            |           |            |
|---|------------|------------|------------|---|------------|-----------|------------|
| H | 0.7159631  | -2.3730861 | 6.8683106  | H | -1.6598173 | 2.0143601 | -5.9802944 |
| C | 0.2051091  | -0.6838602 | 5.6289824  | C | -0.8105062 | 1.3366253 | -4.1582167 |
| C | 0.4033808  | -1.3562392 | 4.4052593  | H | -1.3538111 | 0.4026872 | -4.1839479 |
| H | 0.7137311  | -2.3940383 | 4.3950672  |   |            |           |            |
| C | 0.1987407  | -0.6759815 | 3.2376141  |   |            |           |            |
| C | 0.3523533  | -1.1700885 | 1.8581243  |   |            |           |            |
| C | 0.0000000  | 0.0000000  | 0.9092583  |   |            |           |            |
| C | -0.9792589 | -1.1111721 | -0.9109018 |   |            |           |            |
| C | -0.2697470 | -0.6874428 | -2.0074865 |   |            |           |            |
| C | -0.0541772 | -1.6112443 | -3.0724572 |   |            |           |            |
| C | -0.6958512 | -2.8767860 | -3.0319173 |   |            |           |            |
| C | -0.5069857 | -3.7863127 | -4.0966735 |   |            |           |            |
| H | -1.0135153 | -4.7431160 | -4.0591544 |   |            |           |            |
| C | 0.3102582  | -3.4782389 | -5.1461425 |   |            |           |            |
| H | 0.4523584  | -4.1841761 | -5.9535291 |   |            |           |            |
| C | -1.6091297 | -2.3644232 | -0.8589573 |   |            |           |            |
| H | -2.1827707 | -2.6324770 | 0.0177688  |   |            |           |            |
| C | -1.4919239 | -3.2165028 | -1.9159112 |   |            |           |            |
| H | -1.9828884 | -4.1813345 | -1.8931805 |   |            |           |            |
| C | 0.9869083  | -2.2443979 | -5.1648919 |   |            |           |            |
| H | 1.6598173  | -2.0143601 | -5.9802944 |   |            |           |            |
| C | 0.8105062  | -1.3366253 | -4.1582167 |   |            |           |            |
| H | 1.3538111  | -0.4026872 | -4.1839479 |   |            |           |            |
| O | 1.1369089  | 0.2640379  | 0.1570443  |   |            |           |            |
| O | -0.6604843 | 2.2746472  | 1.5109301  |   |            |           |            |
| C | -0.2041357 | 0.6751785  | 8.0454748  |   |            |           |            |
| H | -0.3590217 | 1.1857163  | 8.9864136  |   |            |           |            |
| C | -0.4031263 | 1.3365425  | 6.8680436  |   |            |           |            |
| H | -0.7159631 | 2.3730861  | 6.8683106  |   |            |           |            |
| C | -0.2051091 | 0.6838602  | 5.6289824  |   |            |           |            |
| C | -0.4033808 | 1.3562392  | 4.4052593  |   |            |           |            |
| H | -0.7137311 | 2.3940383  | 4.3950672  |   |            |           |            |
| C | -0.1987407 | 0.6759815  | 3.2376141  |   |            |           |            |
| C | -0.3523533 | 1.1700885  | 1.8581243  |   |            |           |            |
| C | 0.9792589  | 1.1111721  | -0.9109018 |   |            |           |            |
| C | 0.2697470  | 0.6874428  | -2.0074865 |   |            |           |            |
| C | 0.0541772  | 1.6112443  | -3.0724572 |   |            |           |            |
| C | 0.6958512  | 2.8767860  | -3.0319173 |   |            |           |            |
| C | 0.5069857  | 3.7863127  | -4.0966735 |   |            |           |            |
| H | 1.0135153  | 4.7431160  | -4.0591544 |   |            |           |            |
| C | -0.3102582 | 3.4782389  | -5.1461425 |   |            |           |            |
| H | -0.4523584 | 4.1841761  | -5.9535291 |   |            |           |            |
| C | 1.6091297  | 2.3644232  | -0.8589573 |   |            |           |            |
| H | 2.1827707  | 2.6324770  | 0.0177688  |   |            |           |            |
| C | 1.4919239  | 3.2165028  | -1.9159112 |   |            |           |            |
| H | 1.9828884  | 4.1813345  | -1.8931805 |   |            |           |            |
| C | -0.9869083 | 2.2443979  | -5.1648919 |   |            |           |            |

## 6. NMR-Spectra

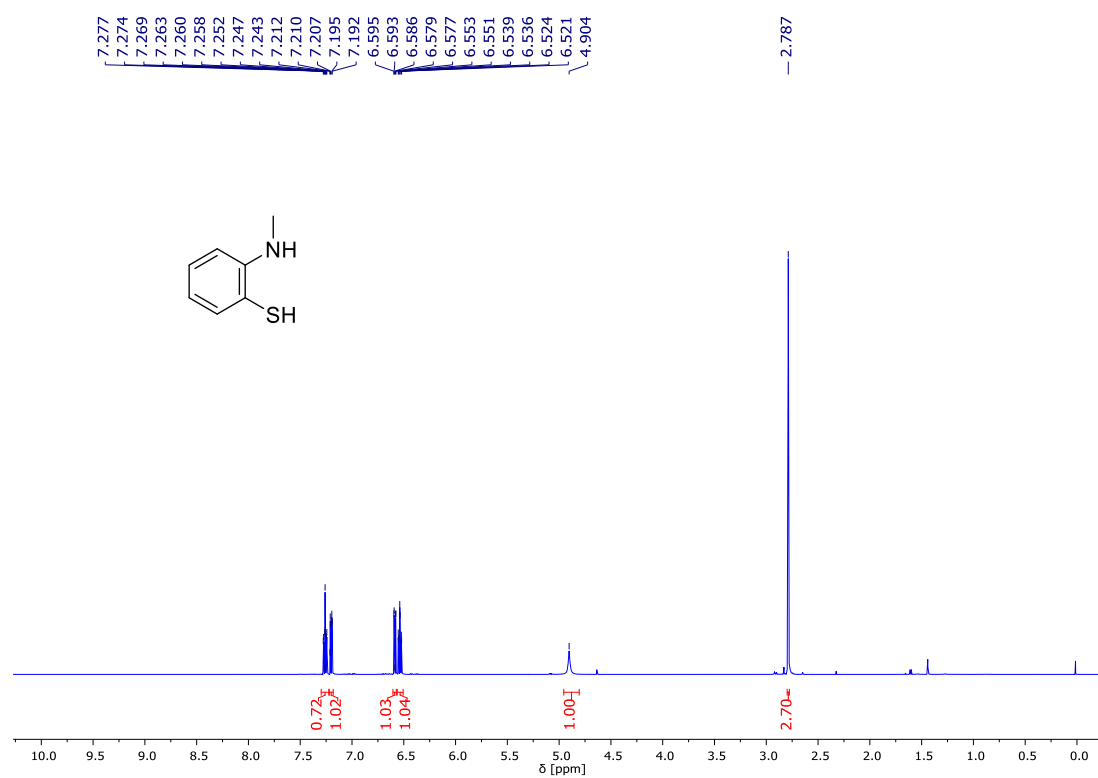

Figure S34: <sup>1</sup>H NMR-spectrum of **2** in CDCl<sub>3</sub> (500 MHz).

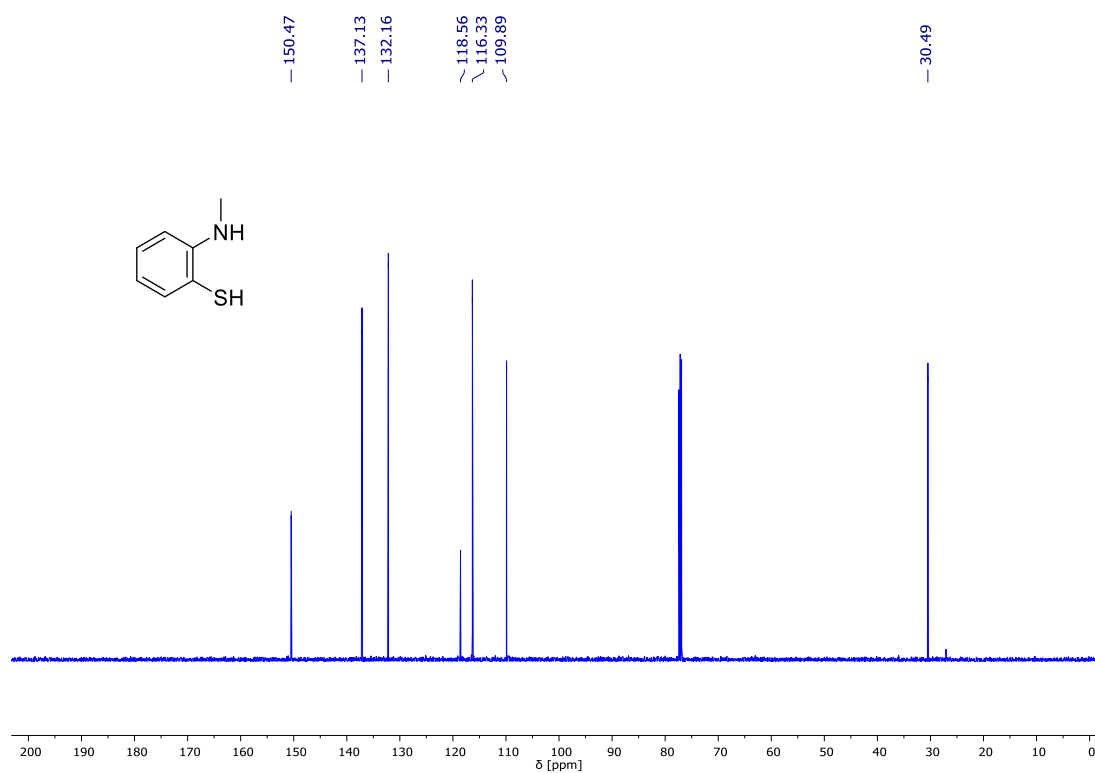

Figure S35: <sup>13</sup>C NMR-spectrum of **2** in CDCl<sub>3</sub> (125 MHz).



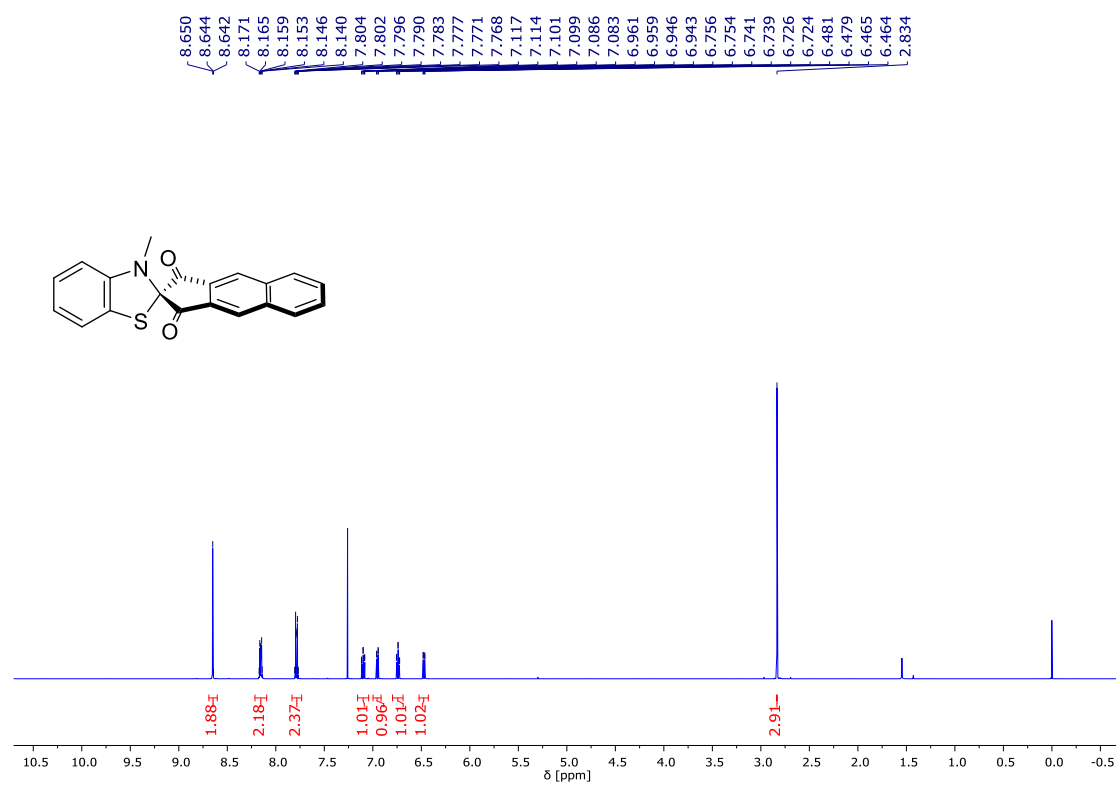

Figure S36: <sup>1</sup>H NMR-spectrum of **4** in CDCl<sub>3</sub> (500 MHz).

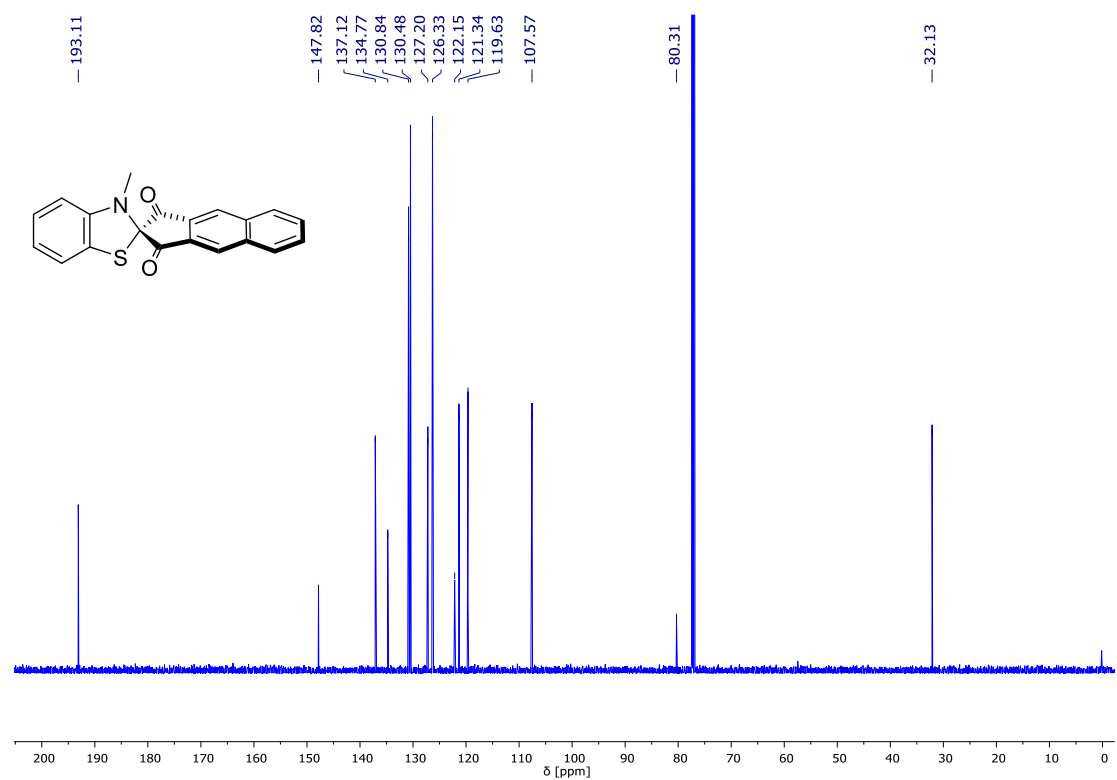

Figure S37: <sup>13</sup>C NMR-spectrum of **4** in CDCl<sub>3</sub> (125 MHz).

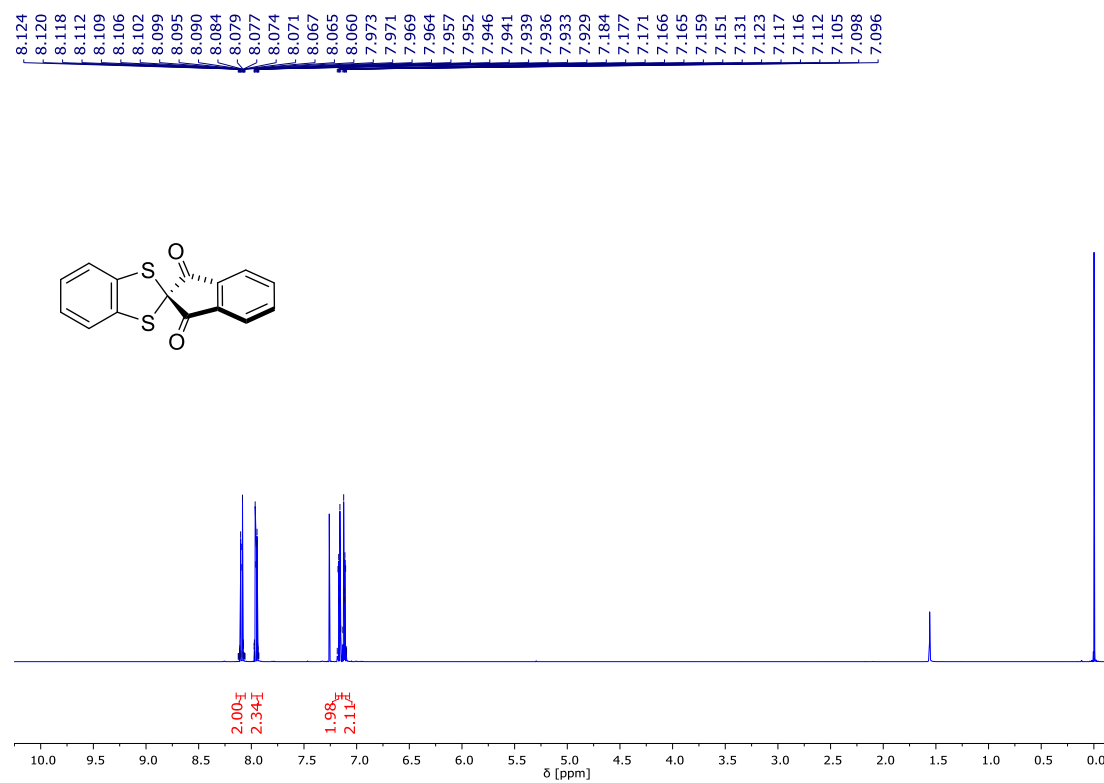

Figure S38: <sup>1</sup>H NMR-spectrum of **7** in CDCl<sub>3</sub> (500 MHz).

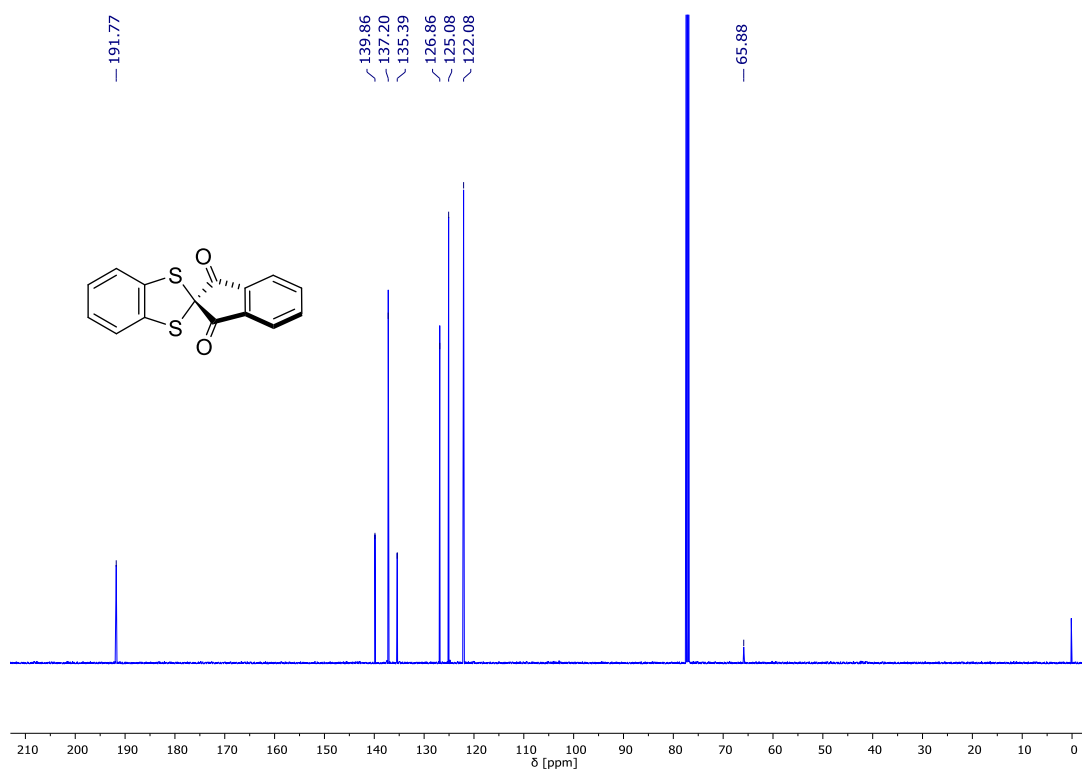

Figure S39: <sup>13</sup>C NMR-spectrum of **7** in CDCl<sub>3</sub> (125 MHz).

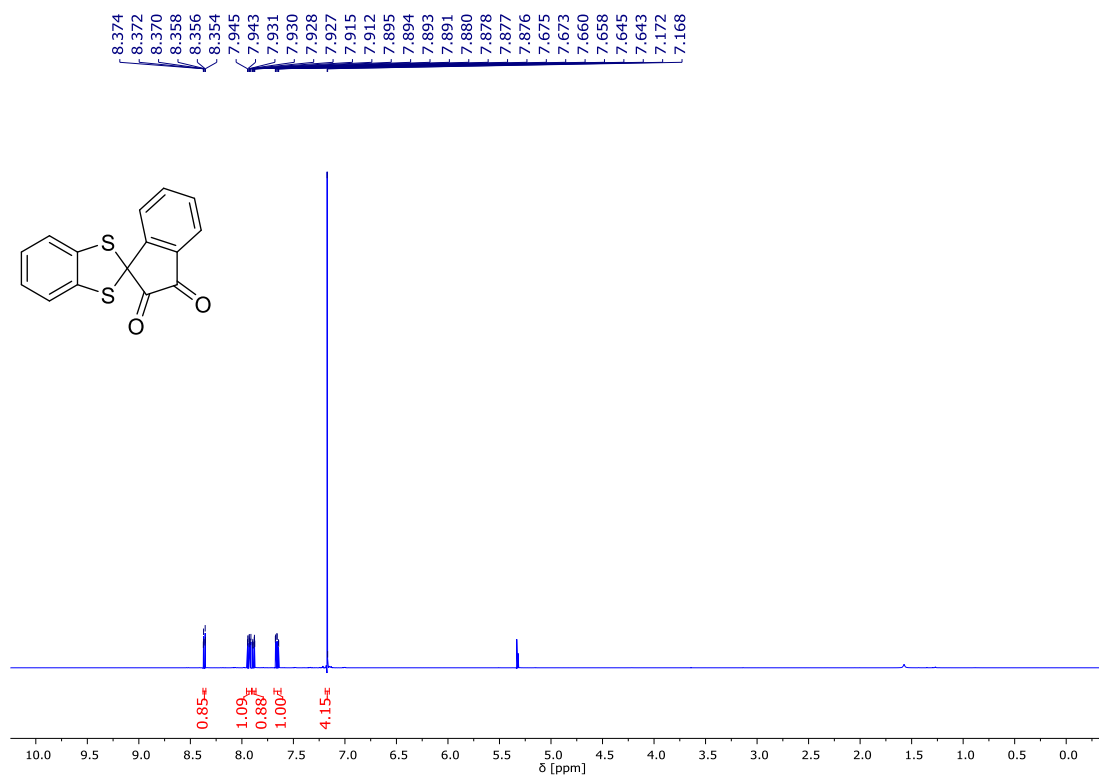

Figure S40: <sup>1</sup>H NMR-spectrum of **8** in CD<sub>2</sub>Cl<sub>2</sub> (400 MHz).

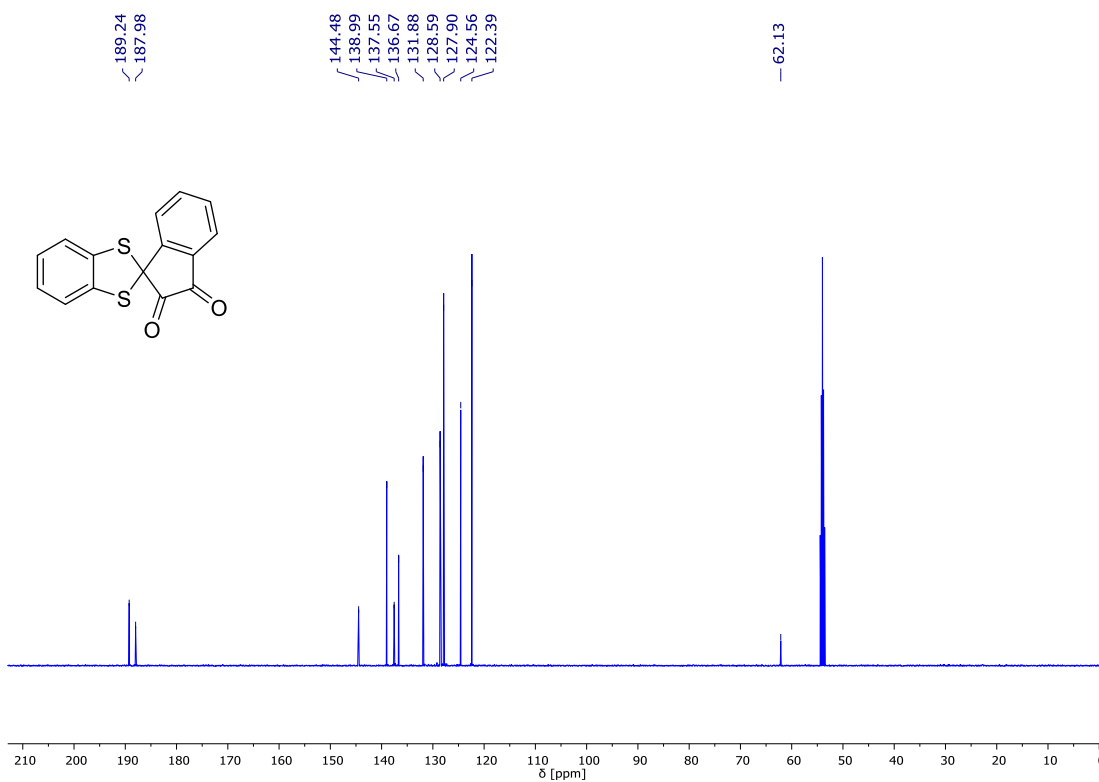

Figure S41: <sup>13</sup>C NMR-spectrum of **8** in CD<sub>2</sub>Cl<sub>2</sub> (101 MHz).

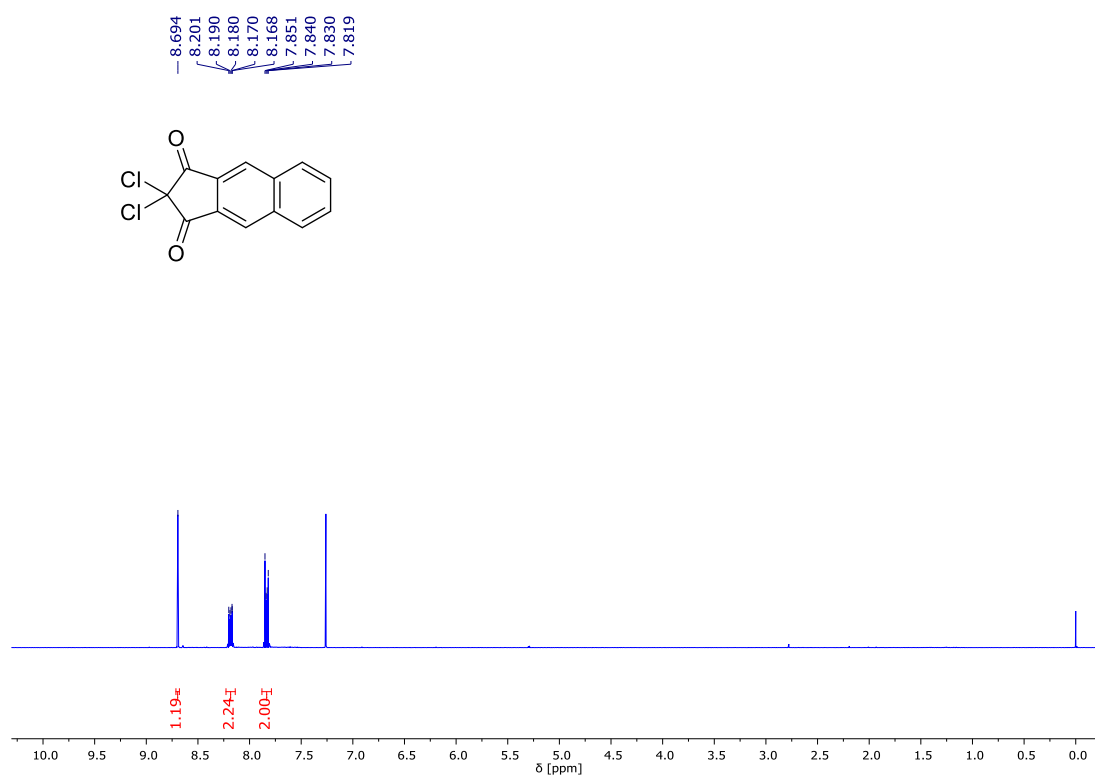

Figure S42: <sup>1</sup>H NMR-spectrum of **10** in CDCl<sub>3</sub> (500 MHz).

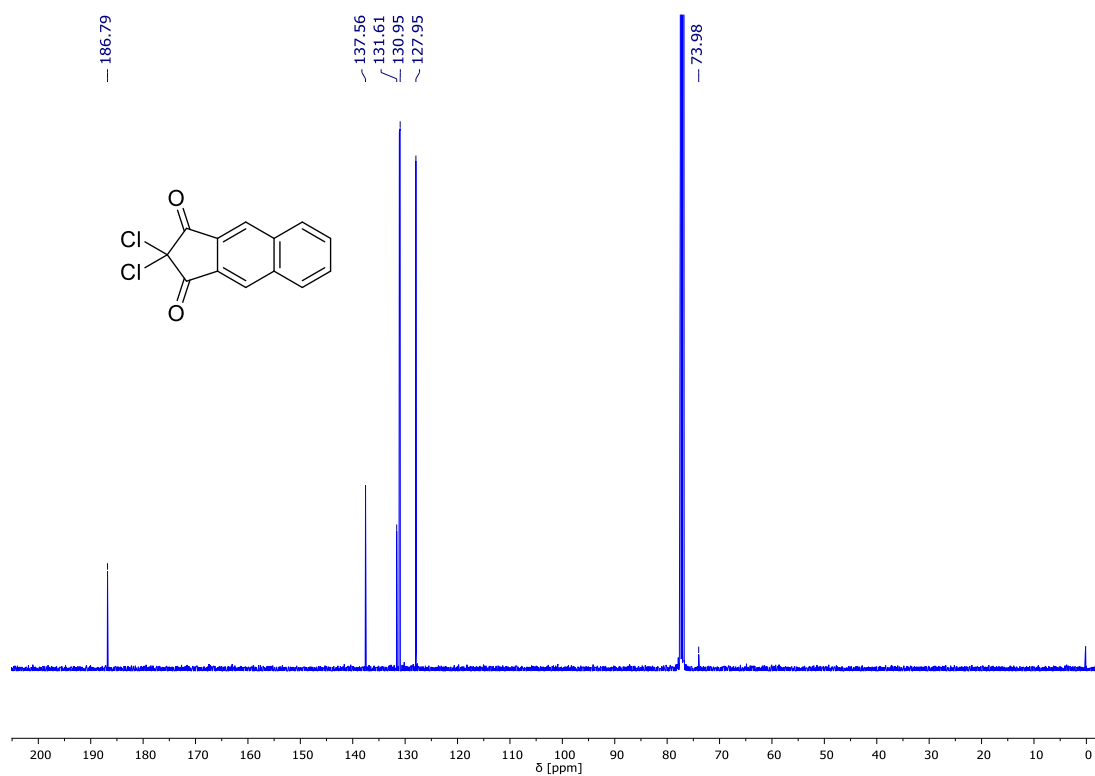

Figure S43: <sup>13</sup>C NMR-spectrum of **10** in CDCl<sub>3</sub> (125 MHz).

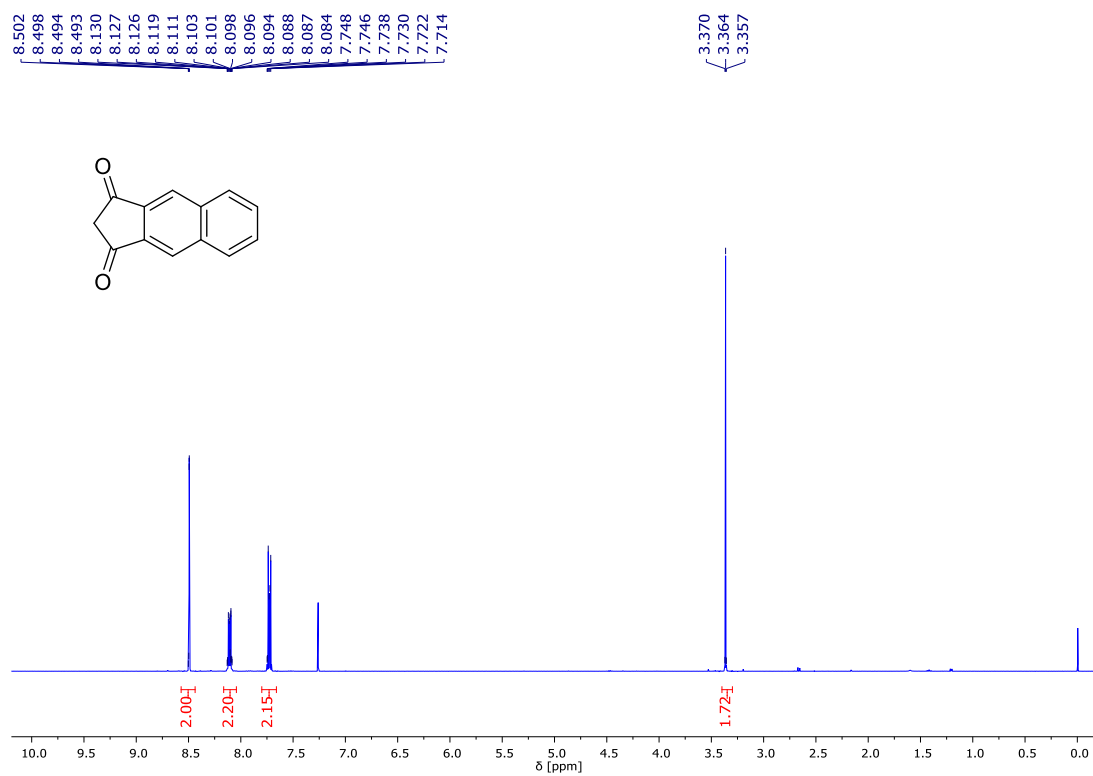

Figure S44: <sup>1</sup>H NMR-spectrum of **13** in CDCl<sub>3</sub> (500 MHz).

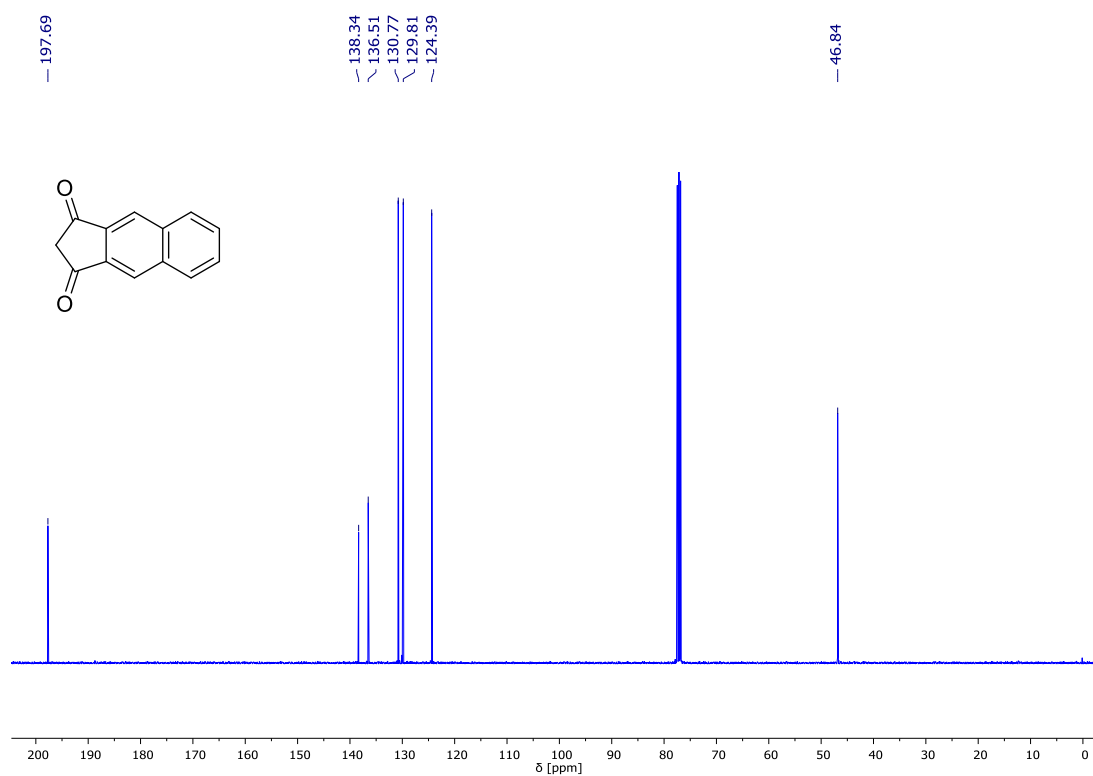

Figure S45: <sup>13</sup>C NMR-spectrum of **13** in CDCl<sub>3</sub> (125 MHz).

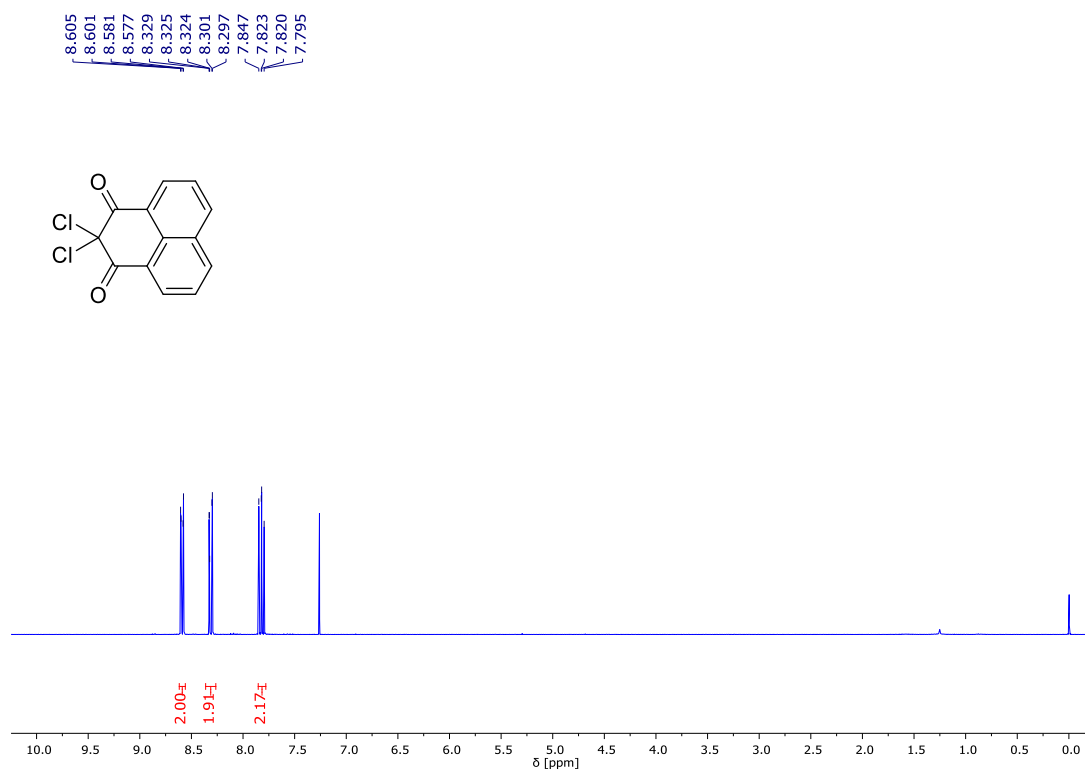

Figure S46: <sup>1</sup>H NMR-spectrum of **14** in CDCl<sub>3</sub> (500 MHz).

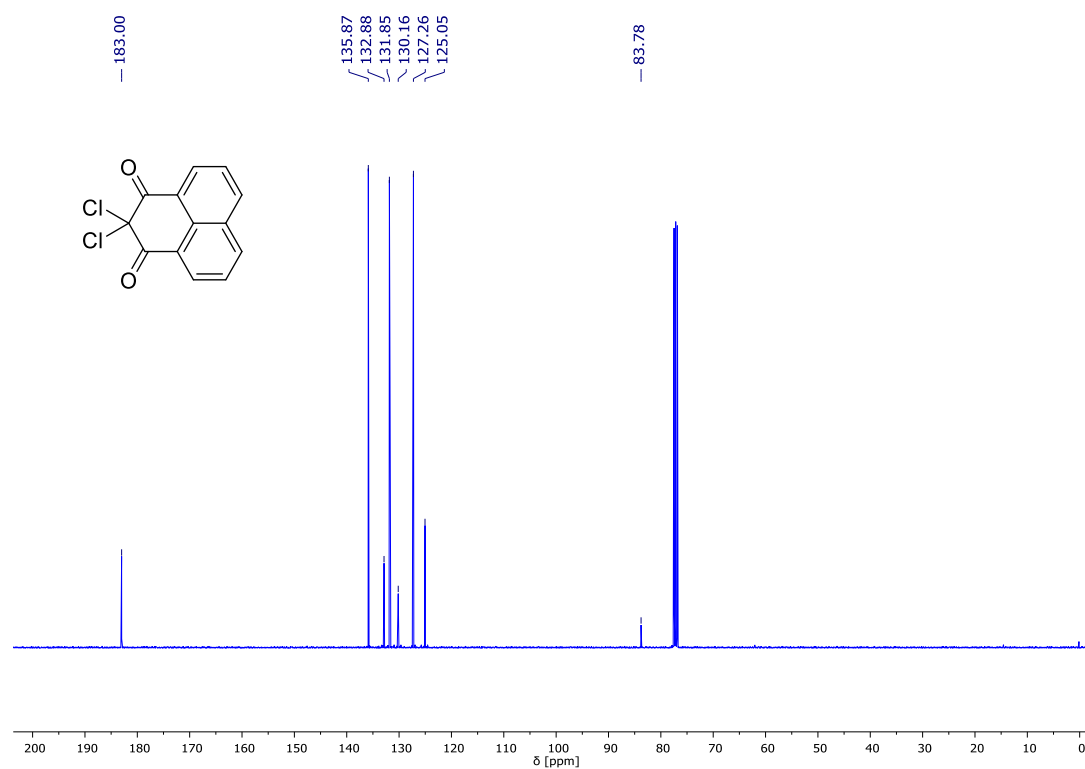

Figure S47: <sup>13</sup>C NMR-spectrum of **14** in CDCl<sub>3</sub> (101 MHz).

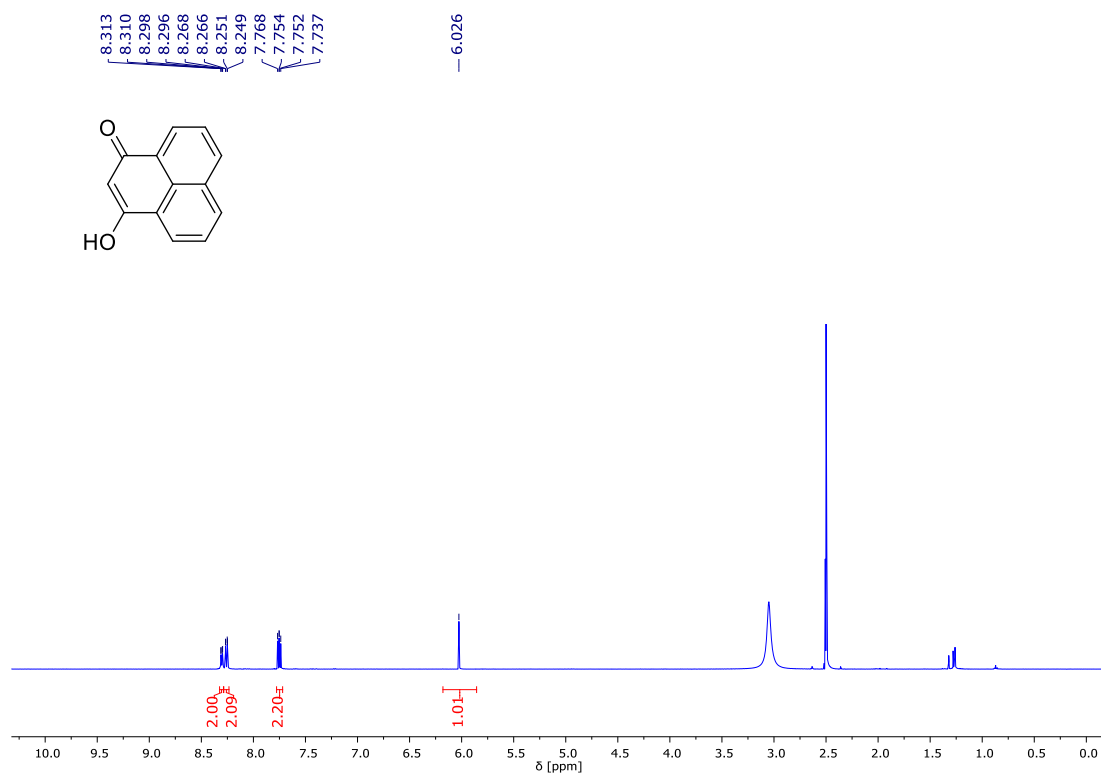

Figure S48: <sup>1</sup>H NMR-spectrum of **15** in DMSO-*d*<sub>6</sub> (400 MHz).

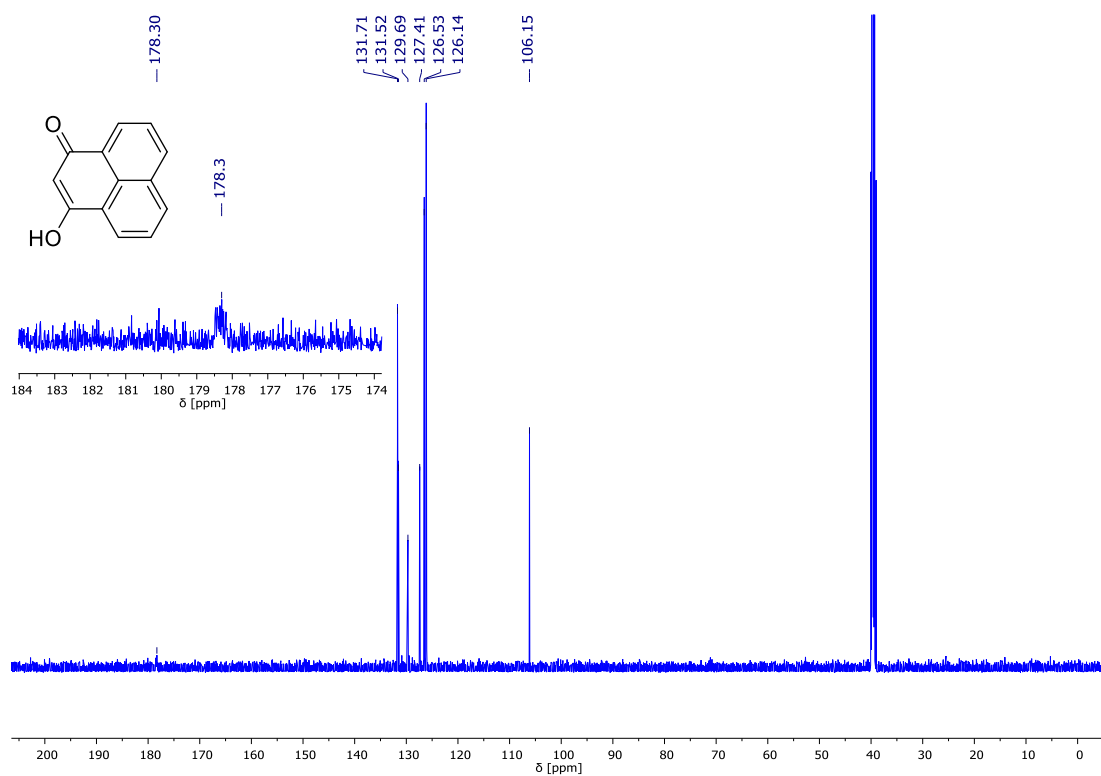

Figure S49: <sup>13</sup>C NMR-spectrum of **15** in DMSO-*d*<sub>6</sub> (101 MHz).

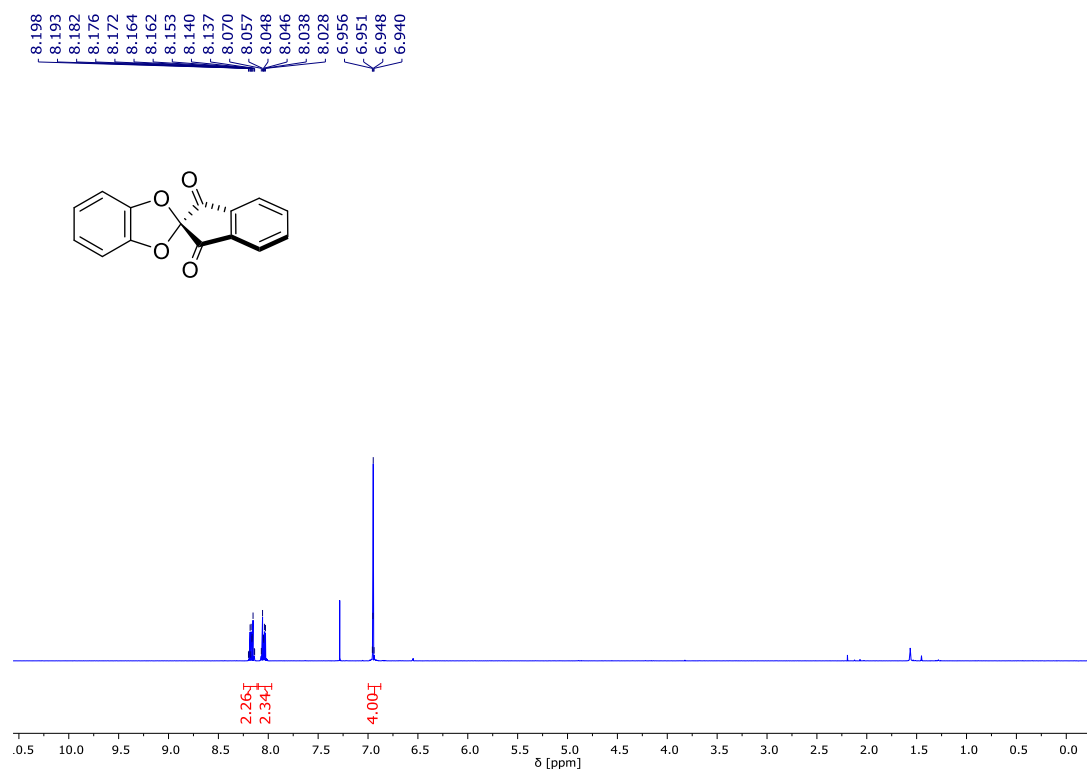

Figure S50: <sup>1</sup>H NMR-spectrum of **21** in CDCl<sub>3</sub> (500 MHz).

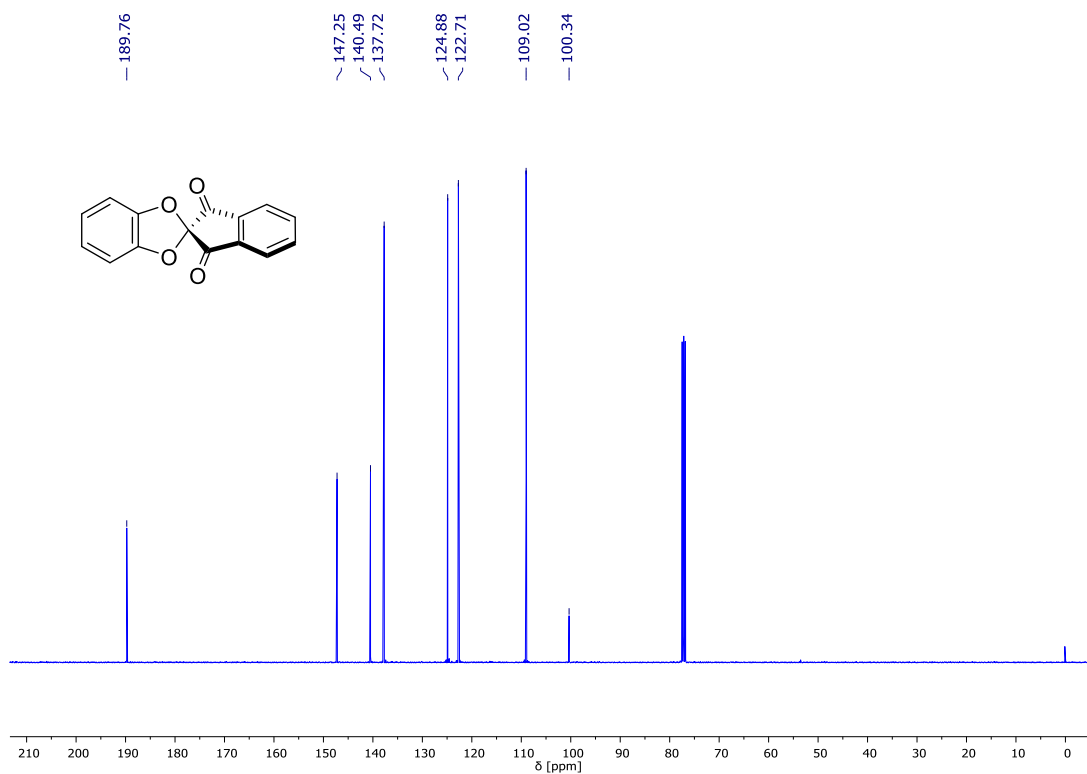

Figure S51: <sup>13</sup>C NMR-spectrum of **21** in CDCl<sub>3</sub> (125 MHz).



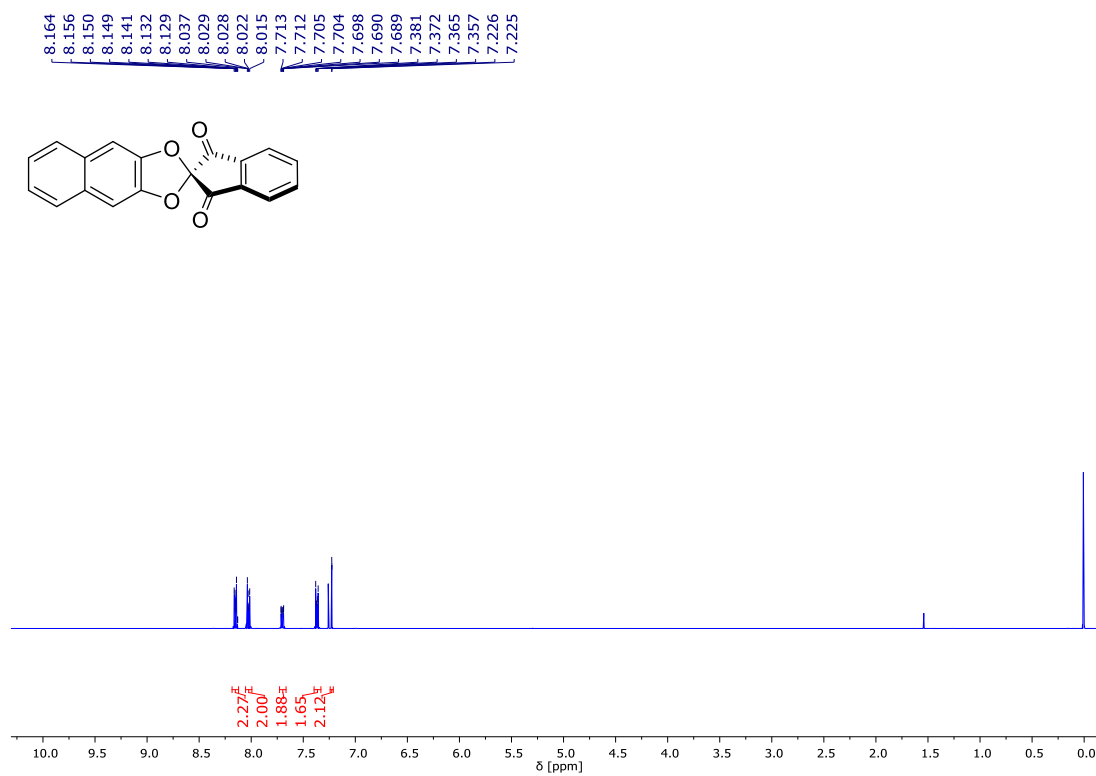

Figure S52: <sup>1</sup>H NMR-spectrum of **22** in CDCl<sub>3</sub> (500 MHz).

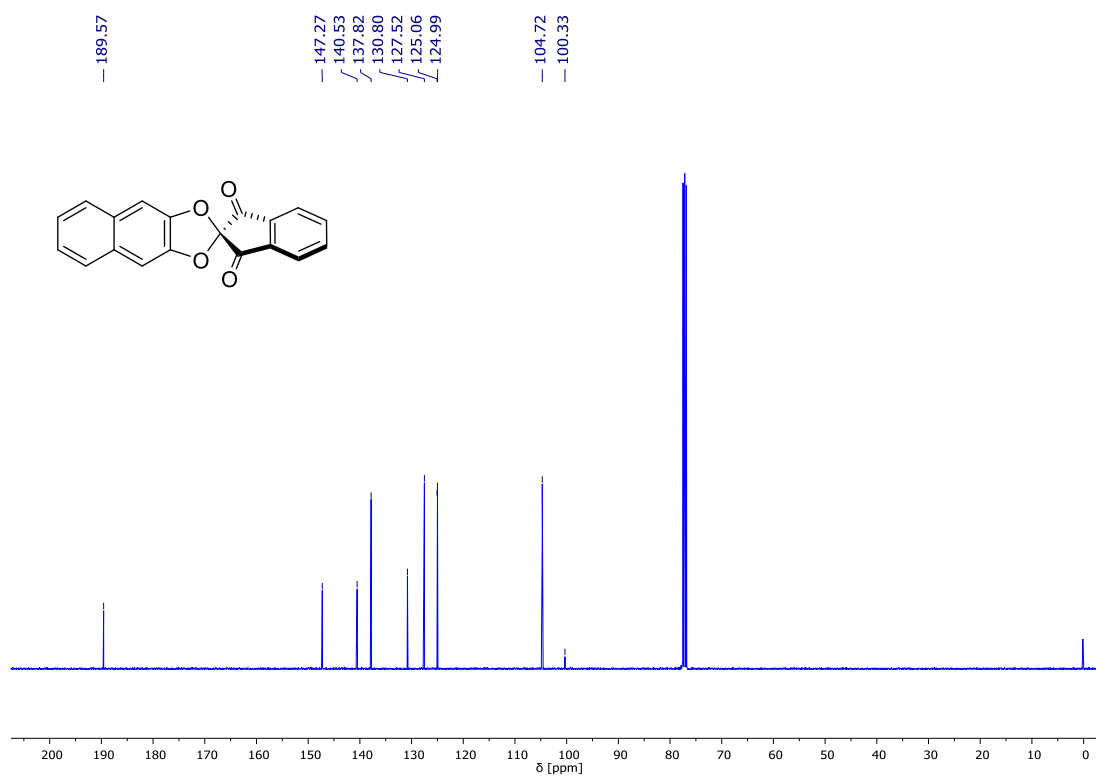

Figure S53: <sup>13</sup>C NMR-spectrum of **22** in CDCl<sub>3</sub> (101 MHz).

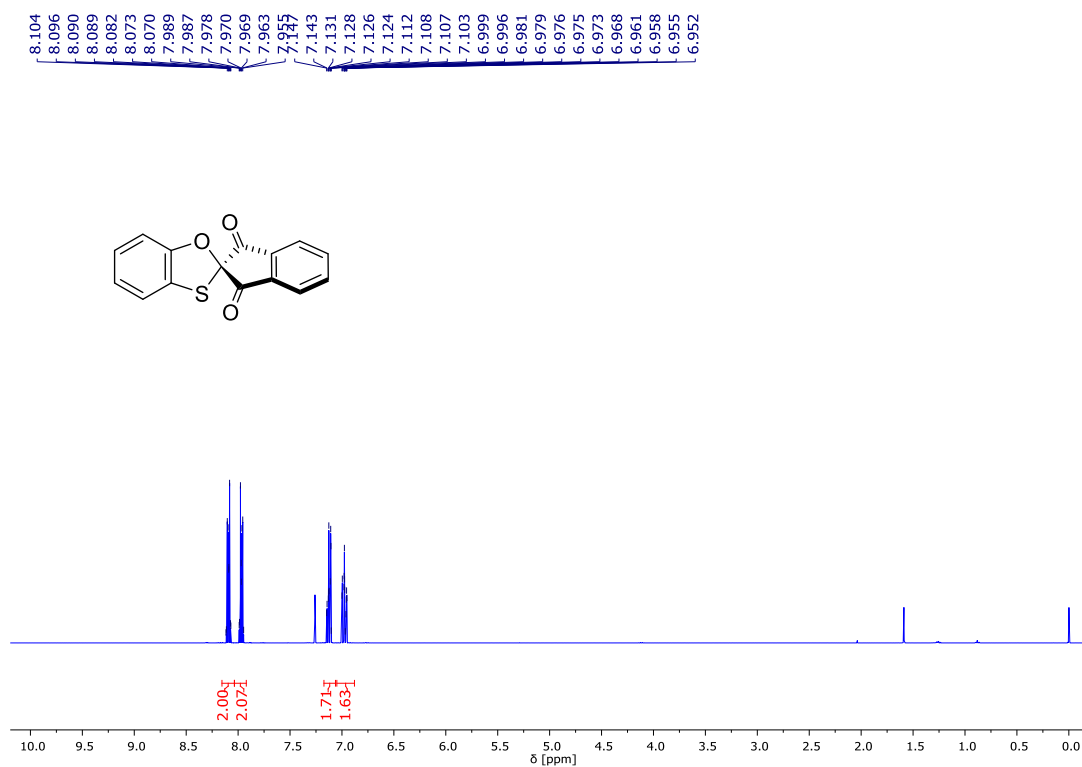

Figure S54: <sup>1</sup>H NMR-spectrum of **23** in CDCl<sub>3</sub> (500 MHz).

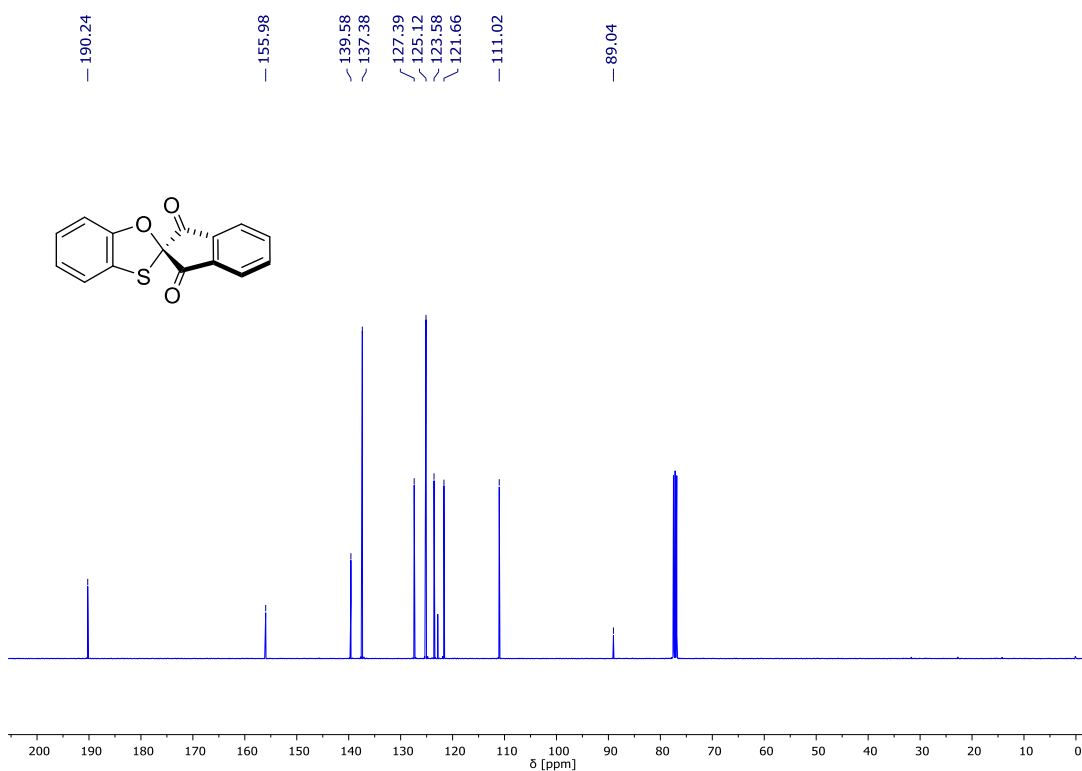

Figure S55: <sup>13</sup>C NMR-spectrum of **23** in CDCl<sub>3</sub> (101 MHz).

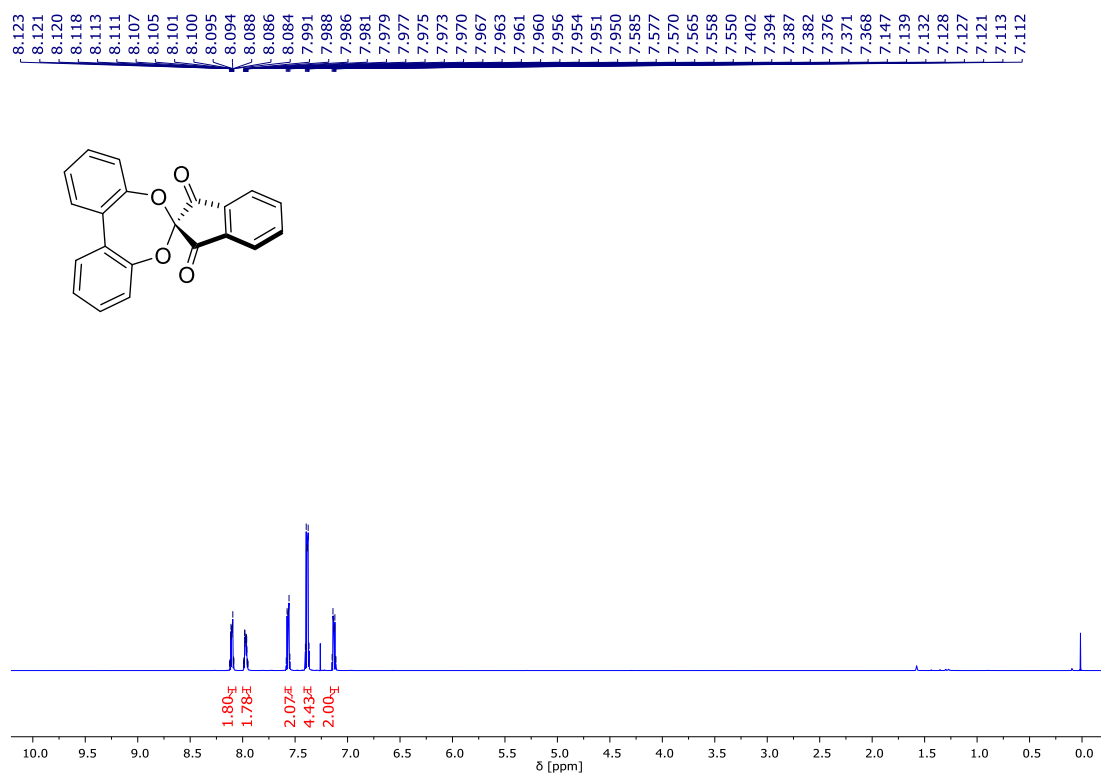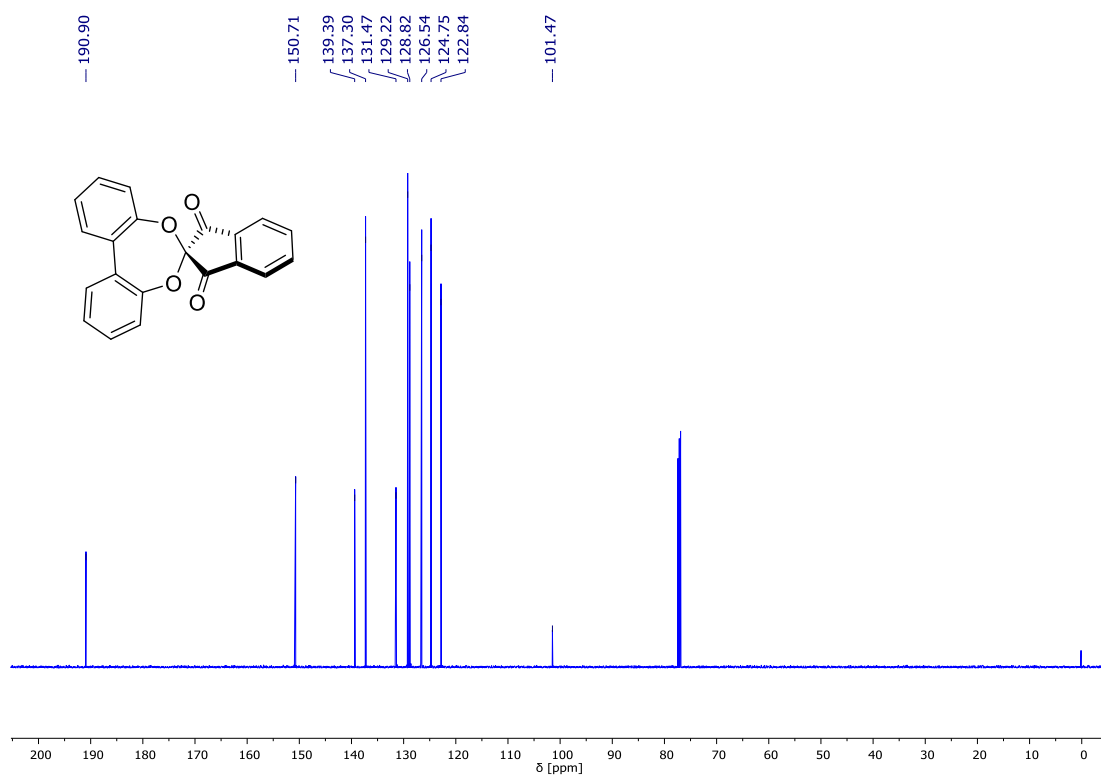

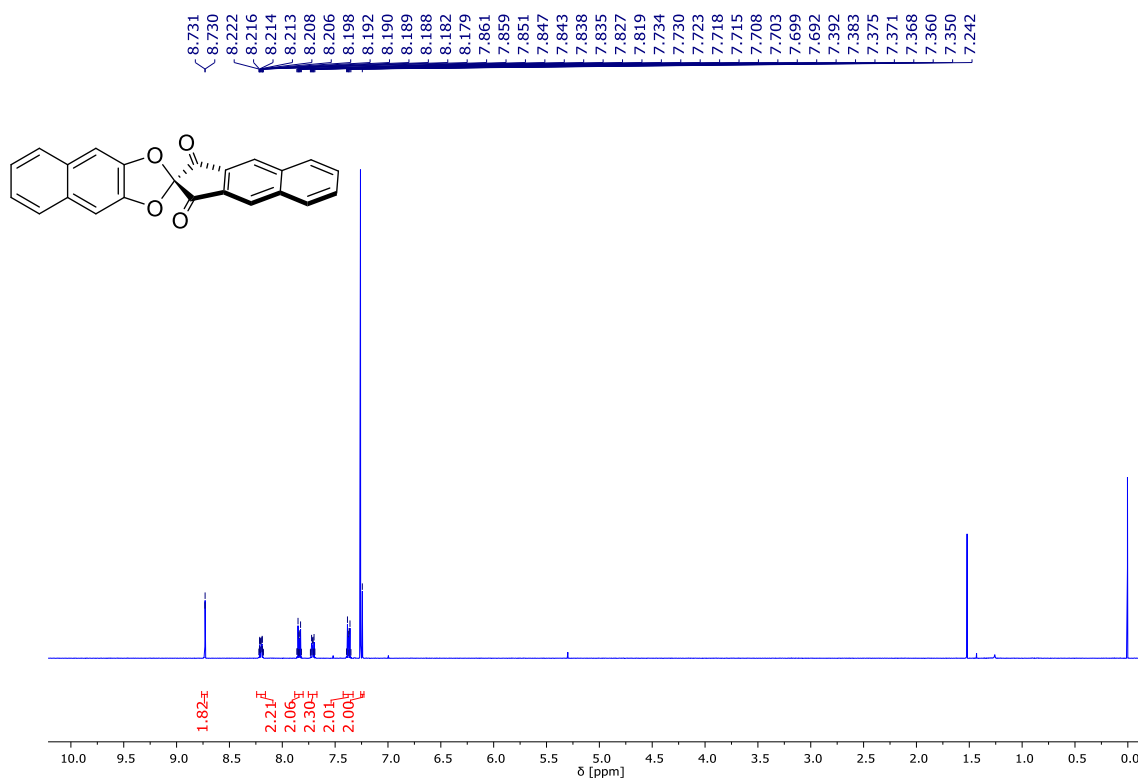

Figure S58: <sup>1</sup>H NMR-spectrum of **26** in CDCl<sub>3</sub> (500 MHz).

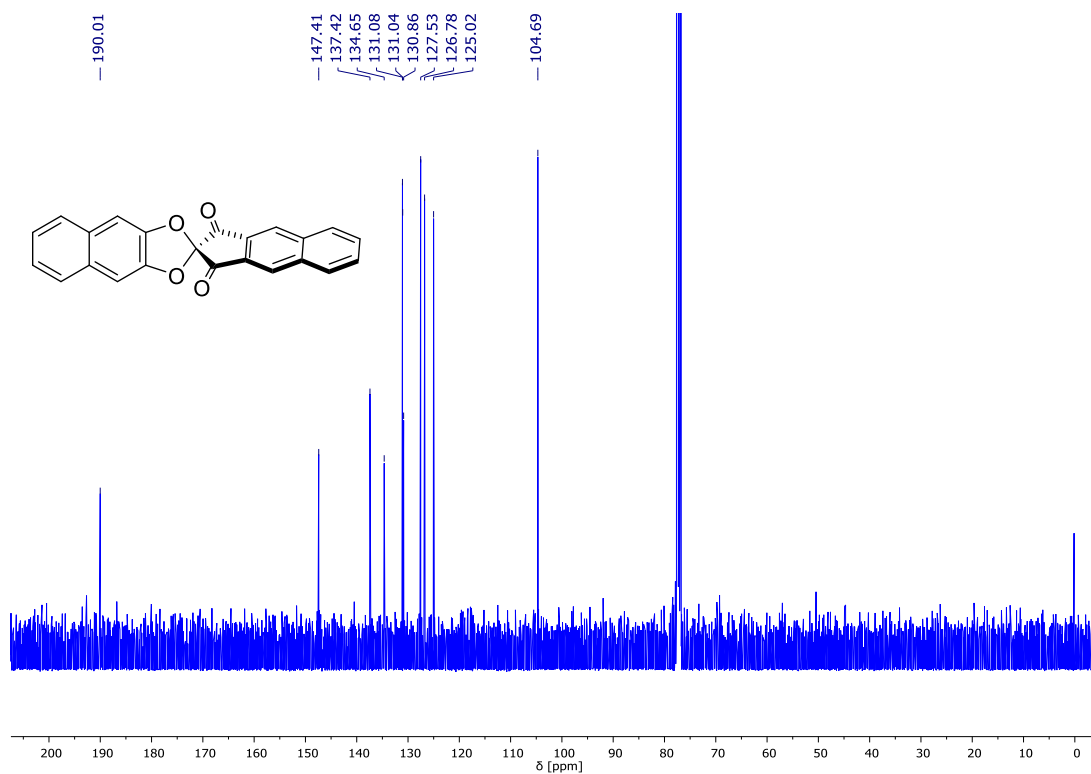

Figure S59: <sup>13</sup>C NMR-spectrum of **26** in CDCl<sub>3</sub> (125 MHz).

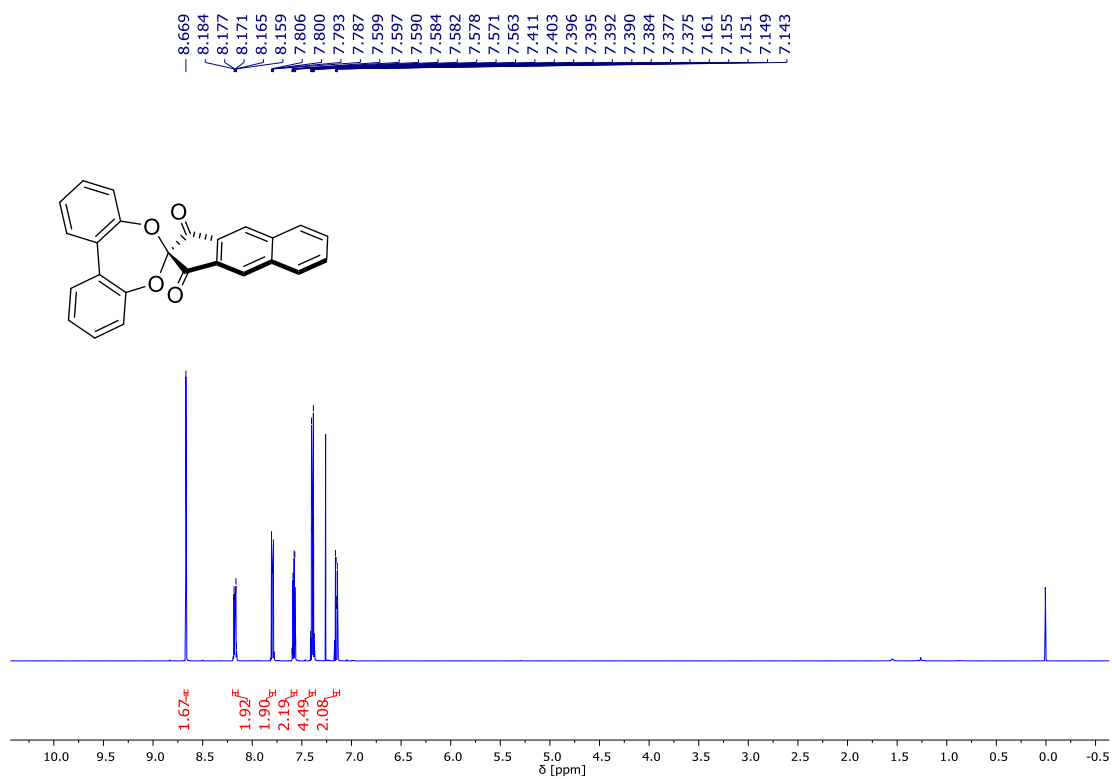

Figure S60: <sup>1</sup>H NMR-spectrum of **27** in CDCl<sub>3</sub> (500 MHz).

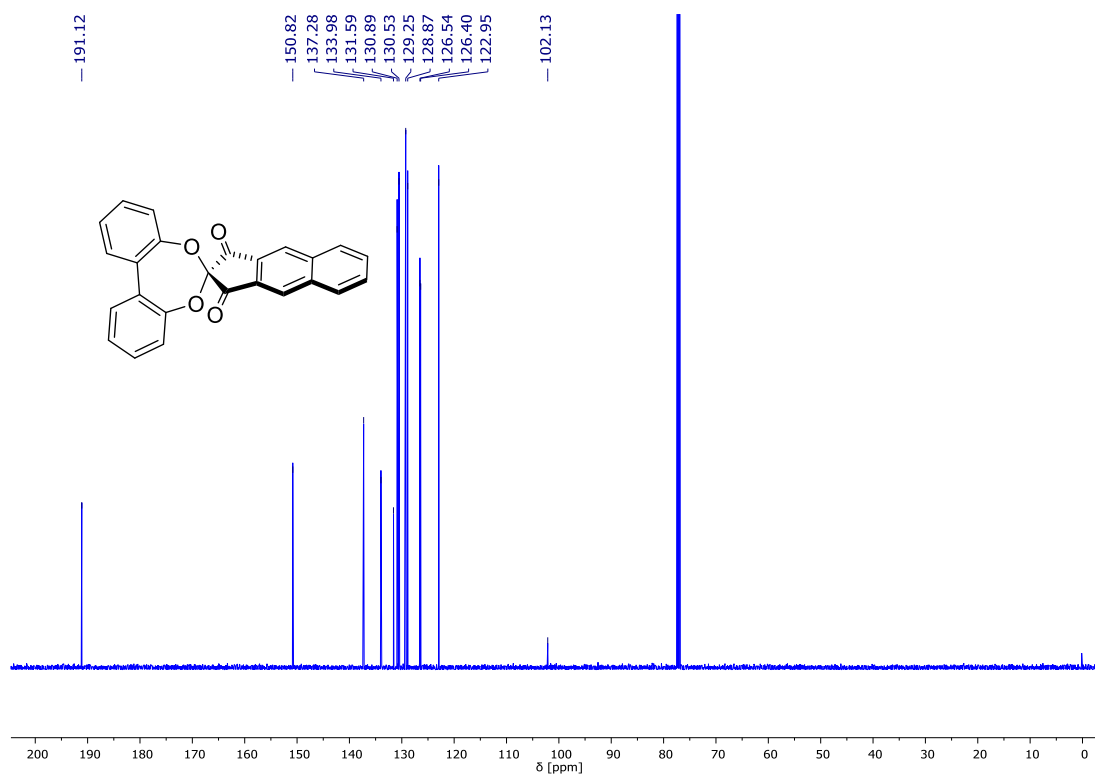

Figure S61: <sup>13</sup>C NMR-spectrum of **27** in CDCl<sub>3</sub> (125 MHz).

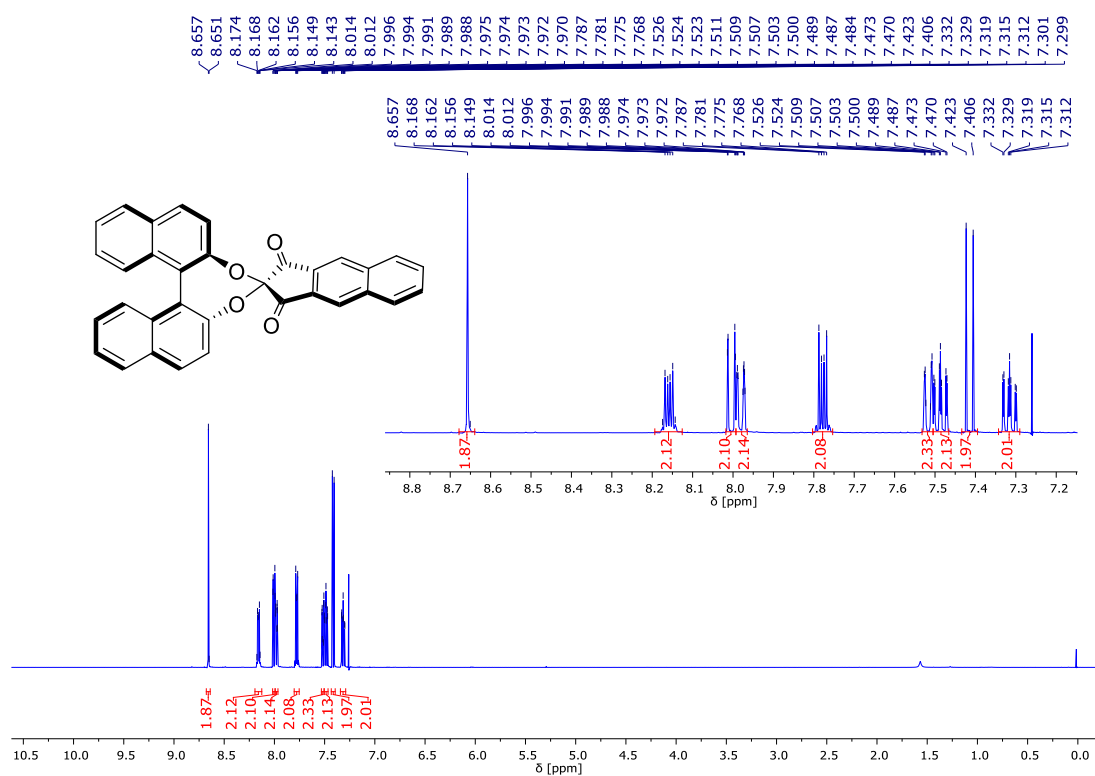

Figure S62: <sup>1</sup>H NMR-spectrum of **28** in CDCl<sub>3</sub> (500 MHz).

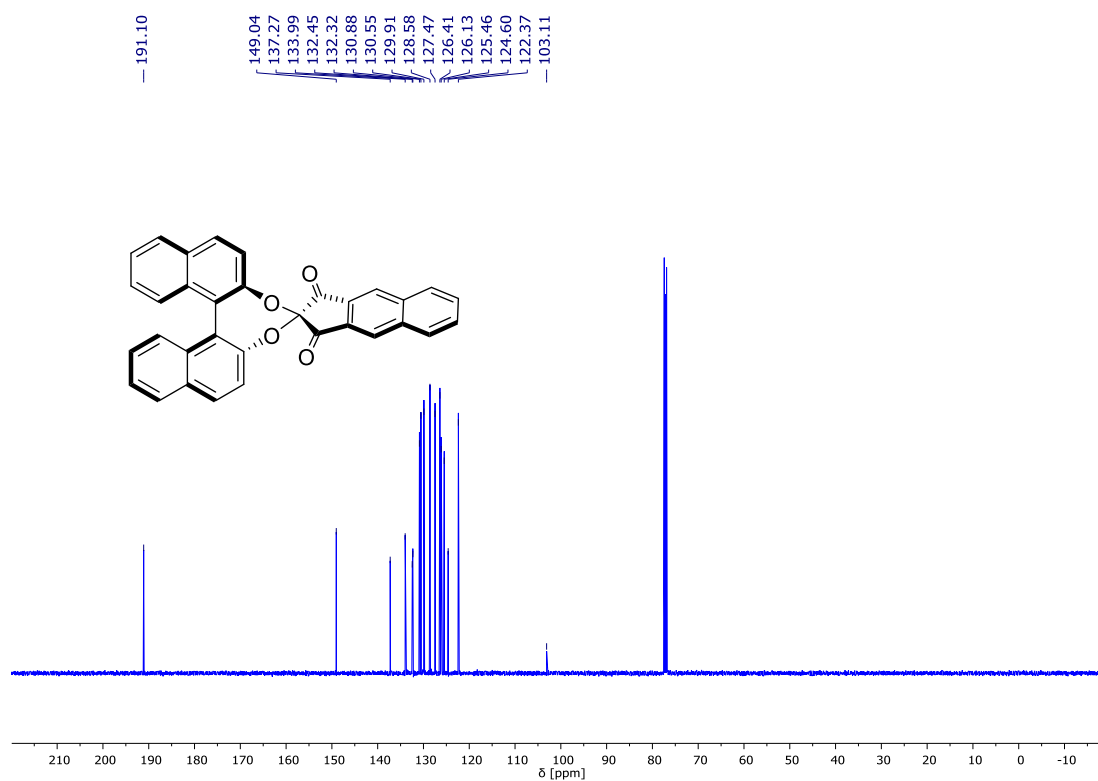

Figure S63: <sup>13</sup>C NMR-spectrum of **28** in CDCl<sub>3</sub> (125 MHz).

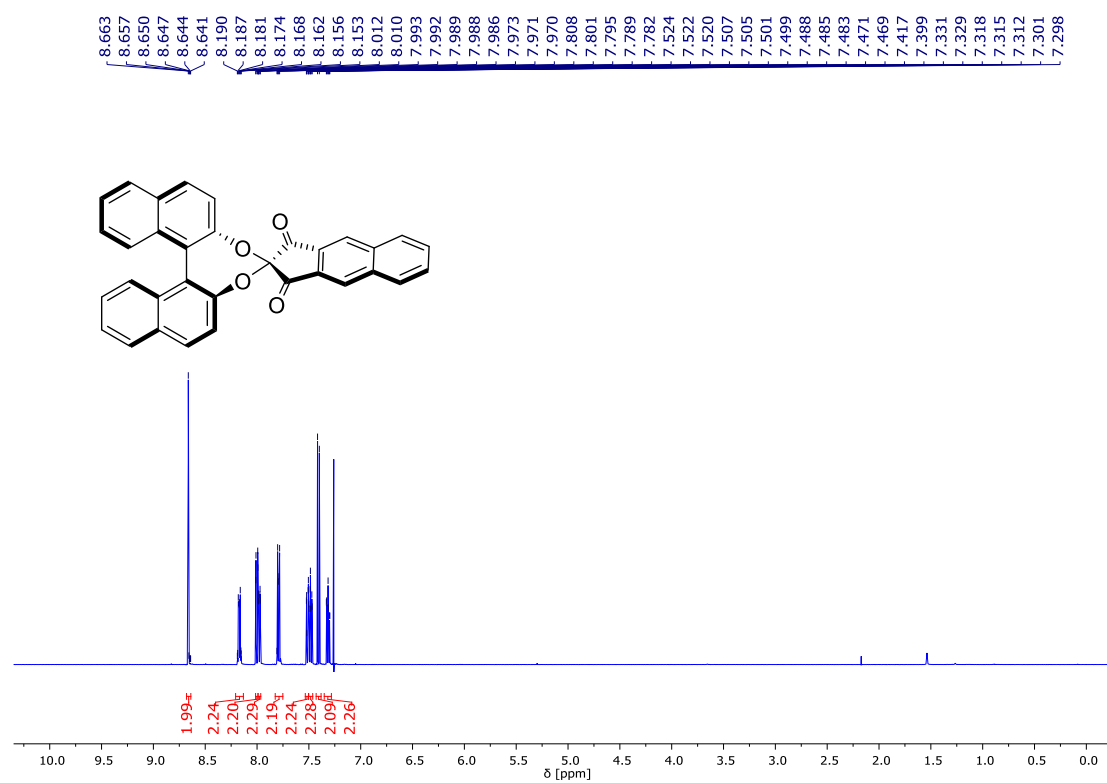

Figure S64: <sup>1</sup>H NMR-spectrum of 29 in CDCl<sub>3</sub> (500 MHz).

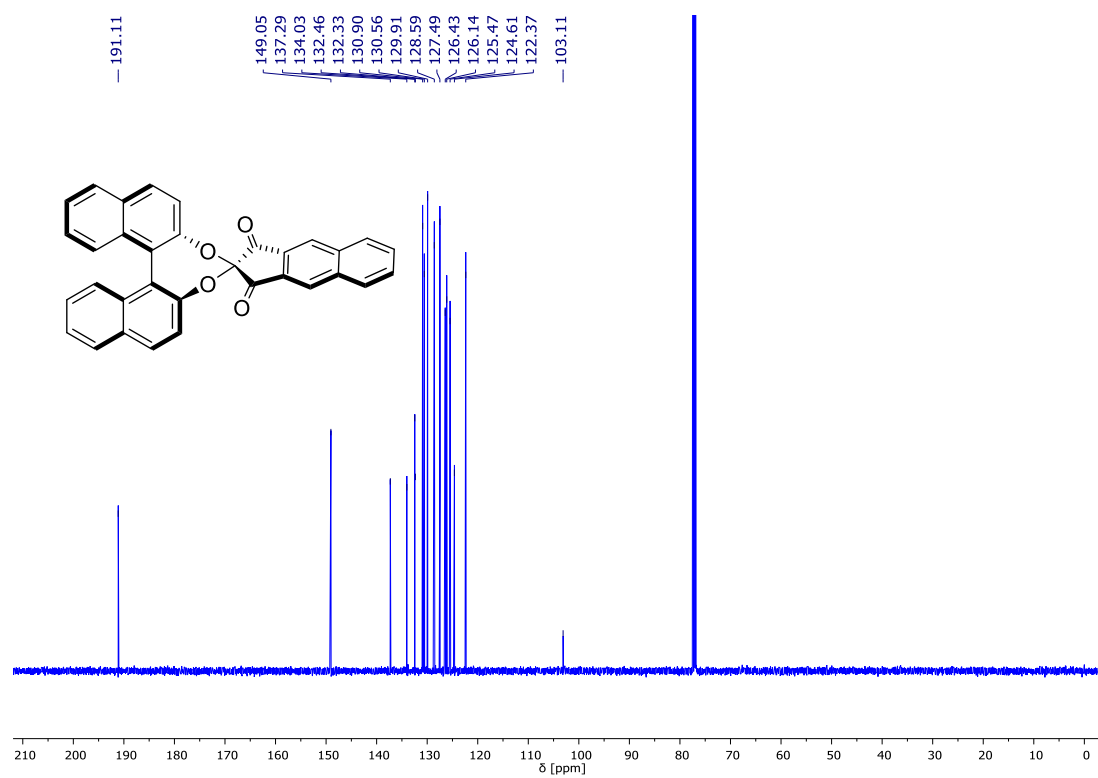

Figure S65: <sup>13</sup>C NMR-spectrum of 29 in CDCl<sub>3</sub> (125 MHz).

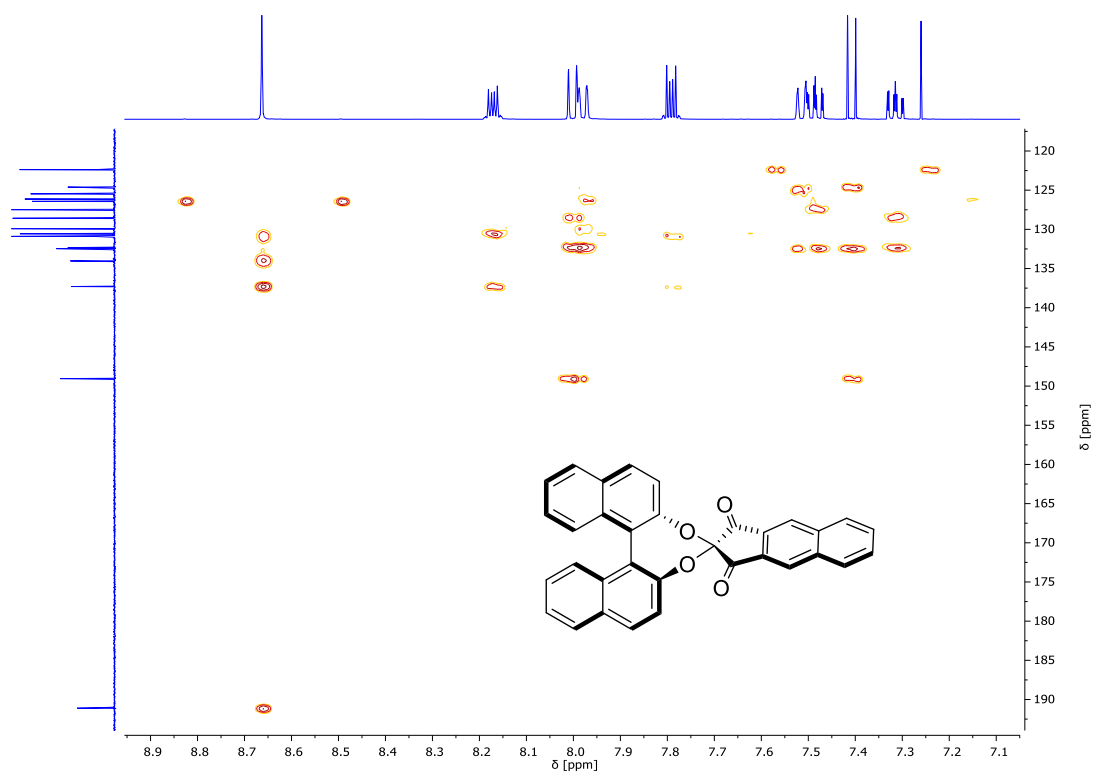

**Figure S66:** HMBC-spectrum of **29** in CDCl<sub>3</sub> (500/125 MHz).

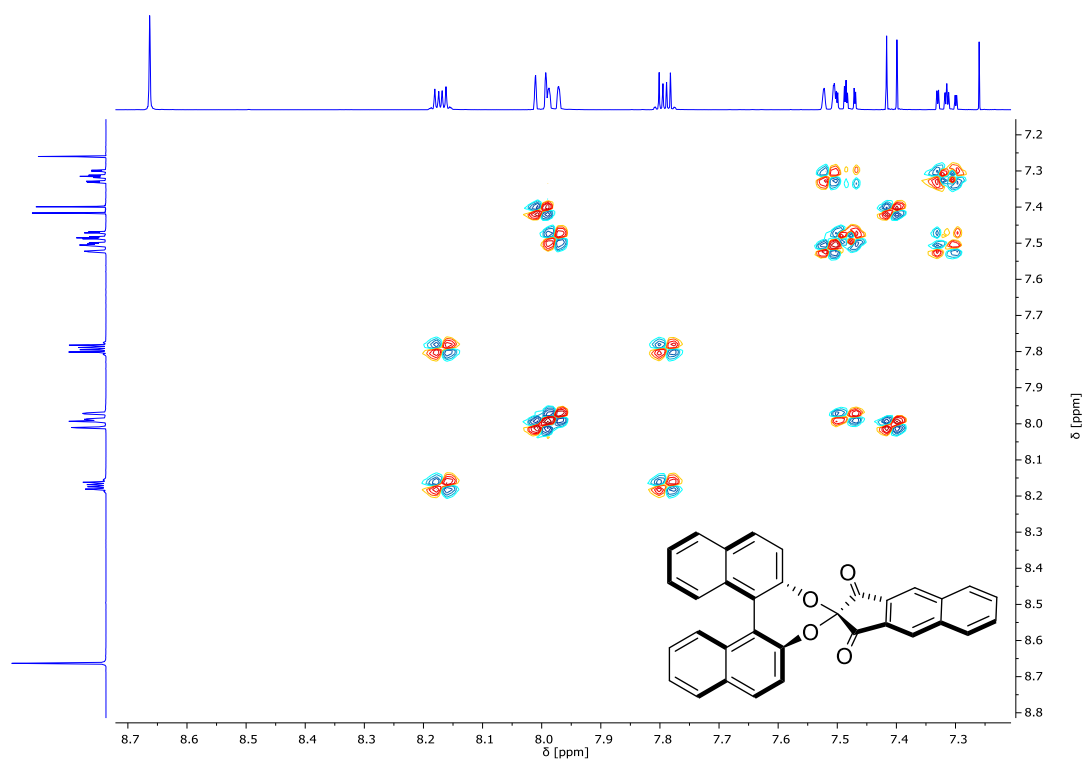

**Figure S67:** DQF-COSY-spectrum of **29** in CDCl<sub>3</sub> (500 MHz).



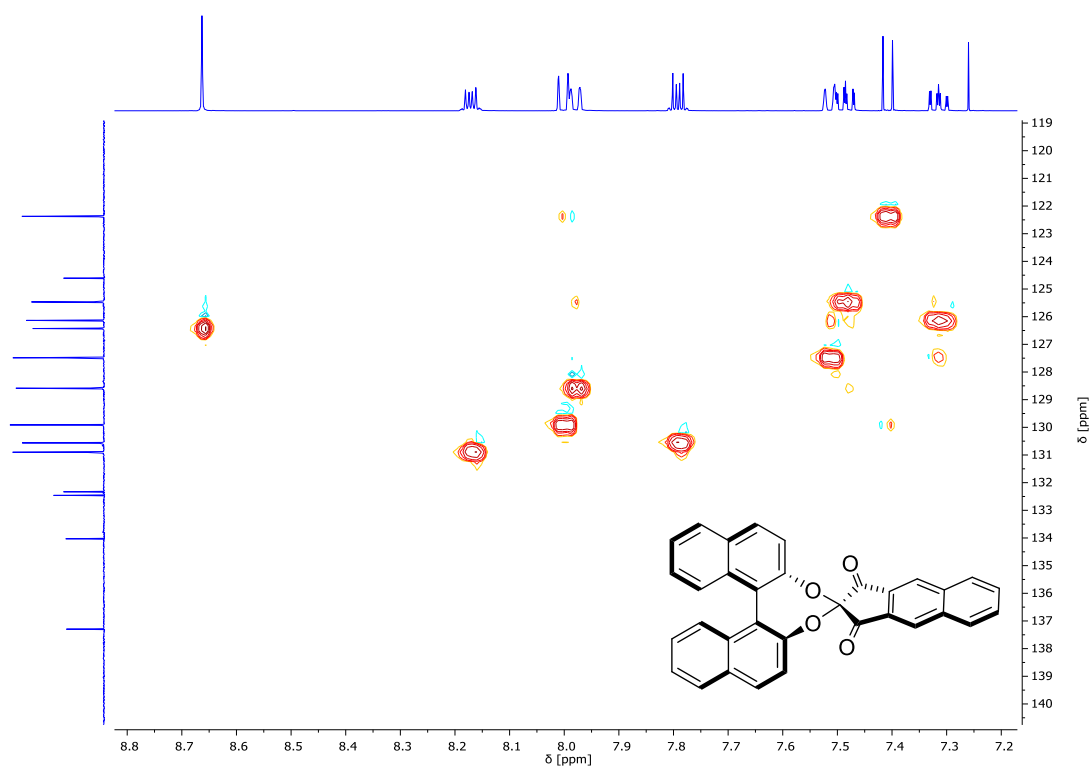

**Figure S68:** HSQC-spectrum of **29** in  $\text{CDCl}_3$  (500/125 MHz).

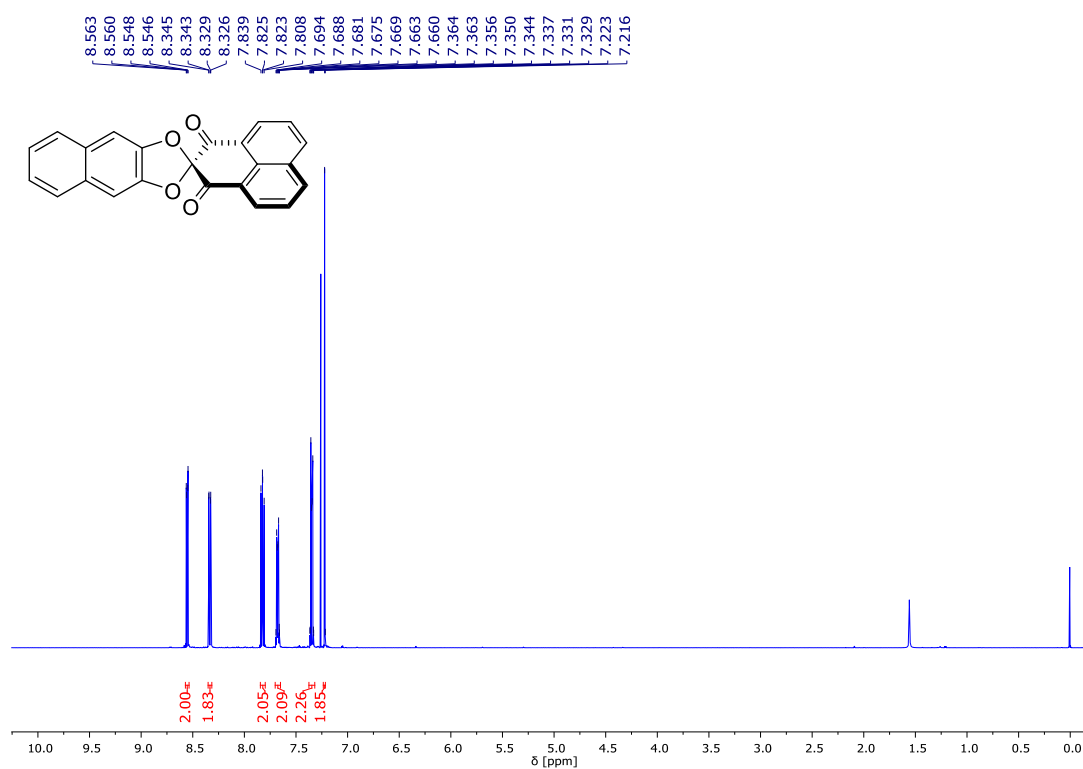

**Figure S69:** <sup>1</sup>H NMR-spectrum of **30** in CDCl<sub>3</sub> (500 MHz).

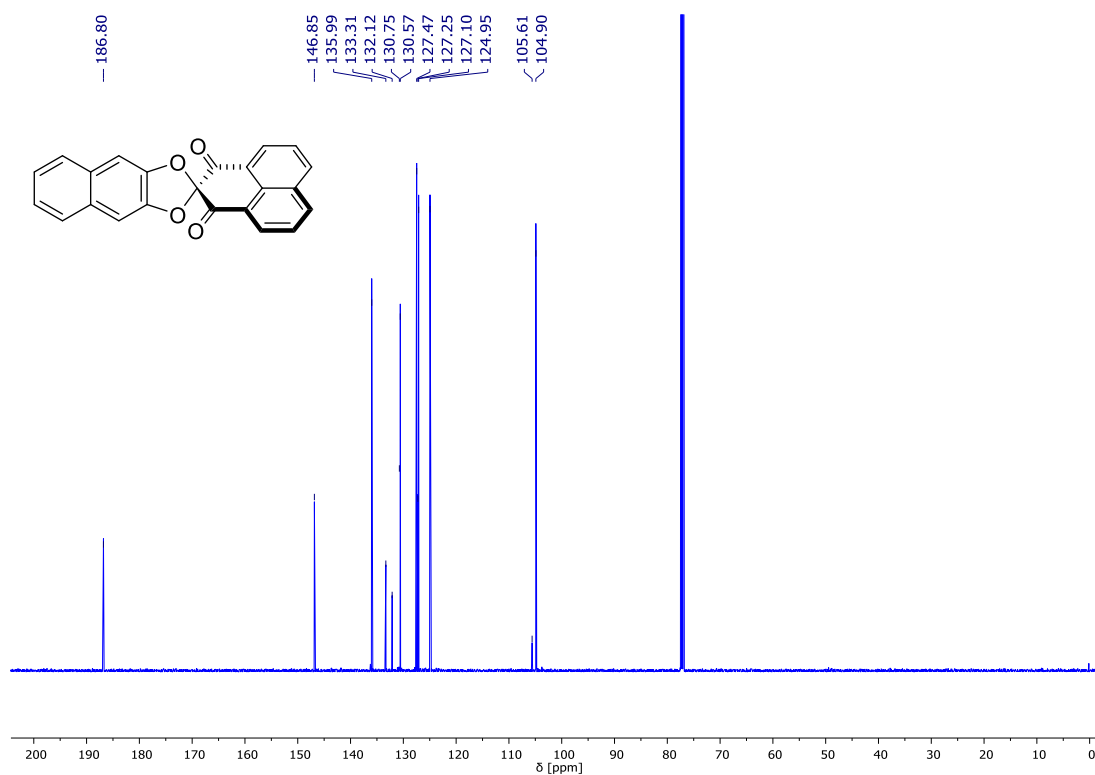

**Figure S70:** <sup>13</sup>C NMR-spectrum of **30** in CDCl<sub>3</sub> (101 MHz).

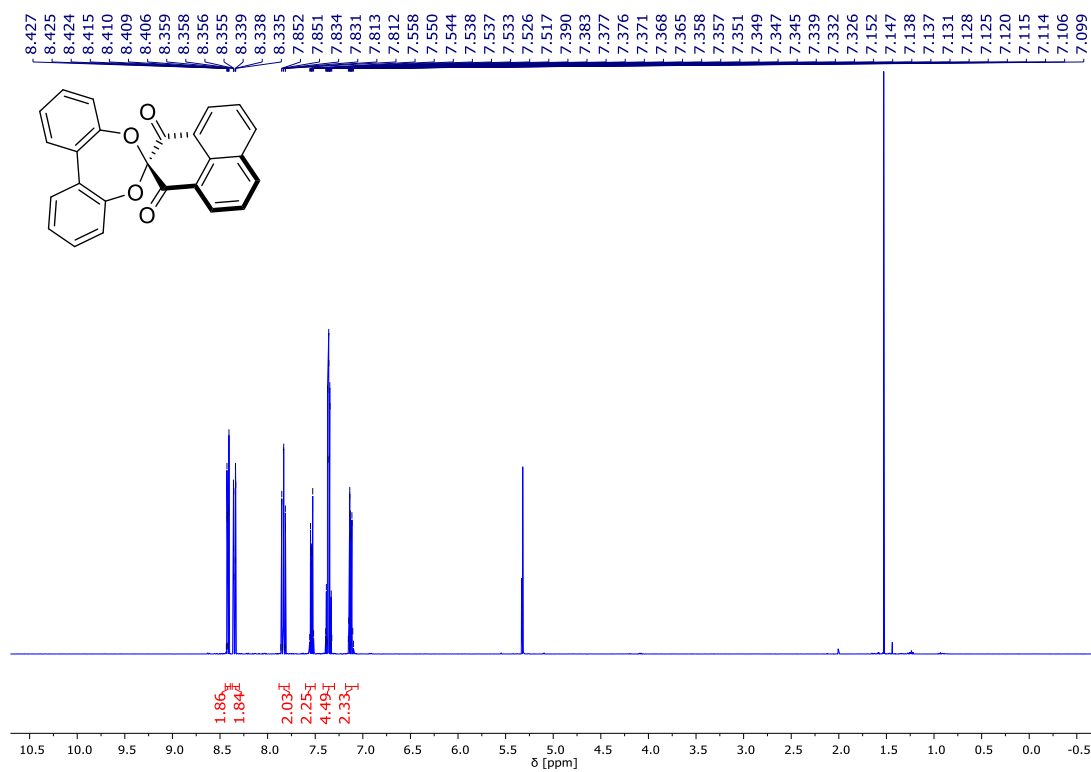

Figure S71: <sup>1</sup>H NMR-spectrum of **31** in CD<sub>2</sub>Cl<sub>2</sub> (400 MHz).

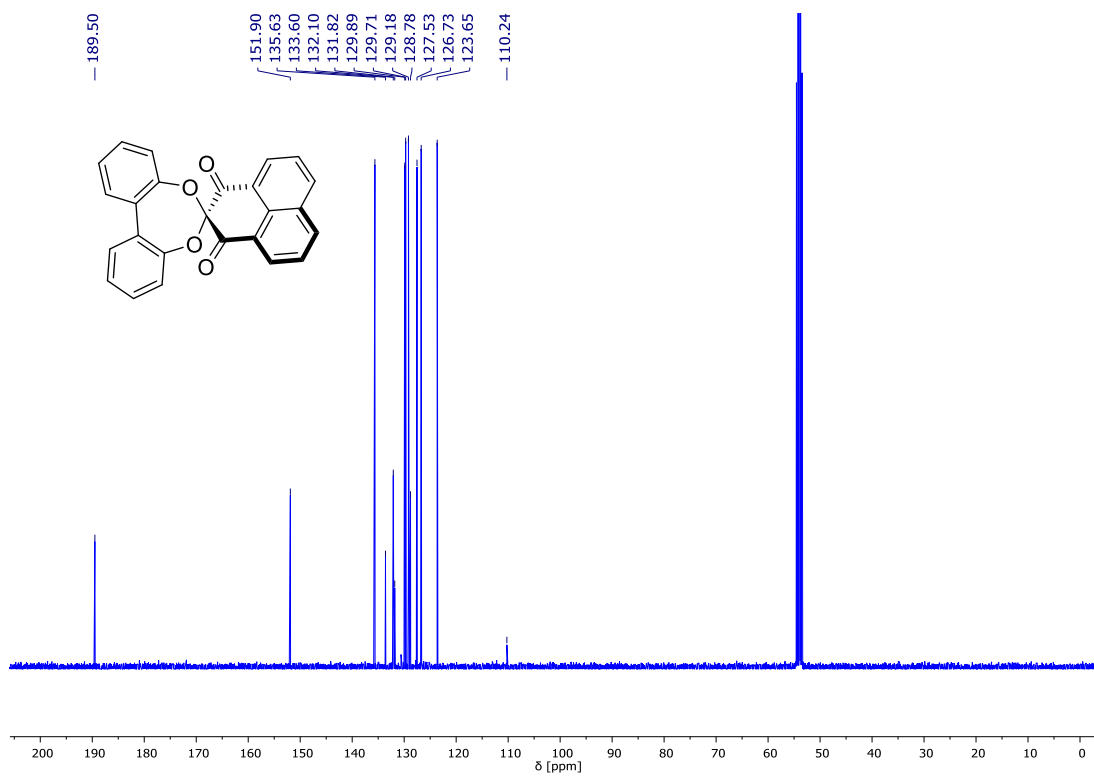

Figure S72: <sup>13</sup>C NMR-spectrum of **31** in CD<sub>2</sub>Cl<sub>2</sub> (101 MHz).

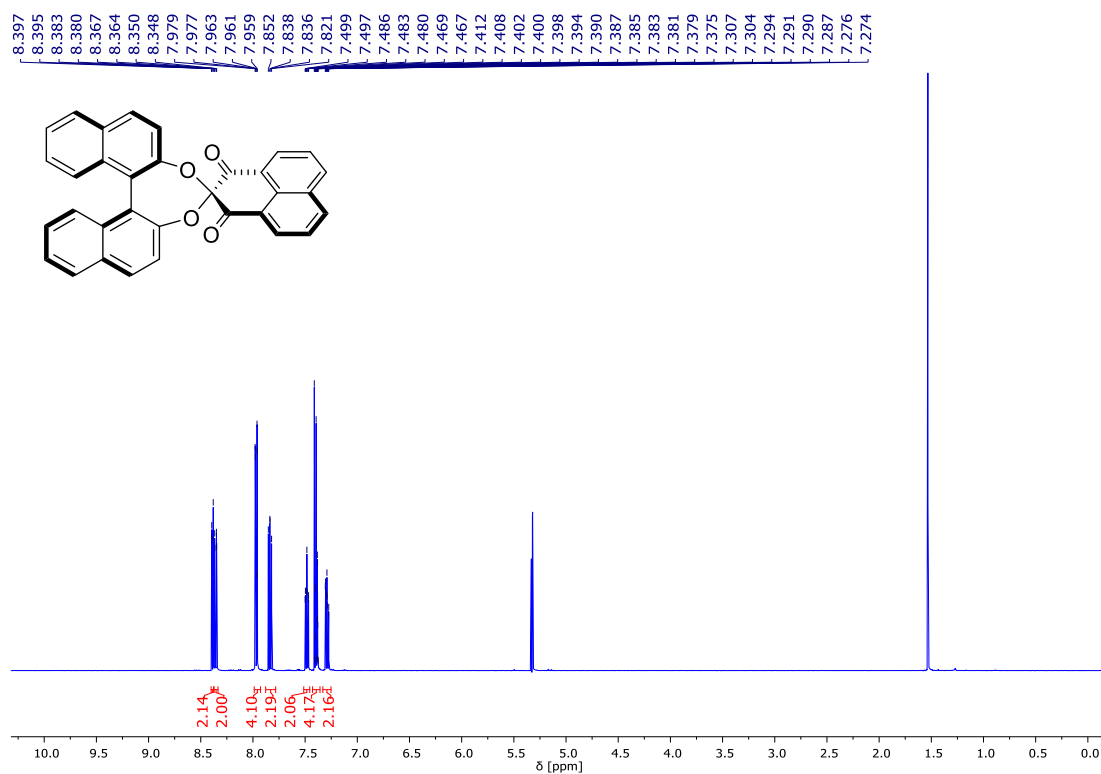

Figure S73: <sup>1</sup>H NMR-spectrum of **32** in CD<sub>2</sub>Cl<sub>2</sub> (400 MHz).

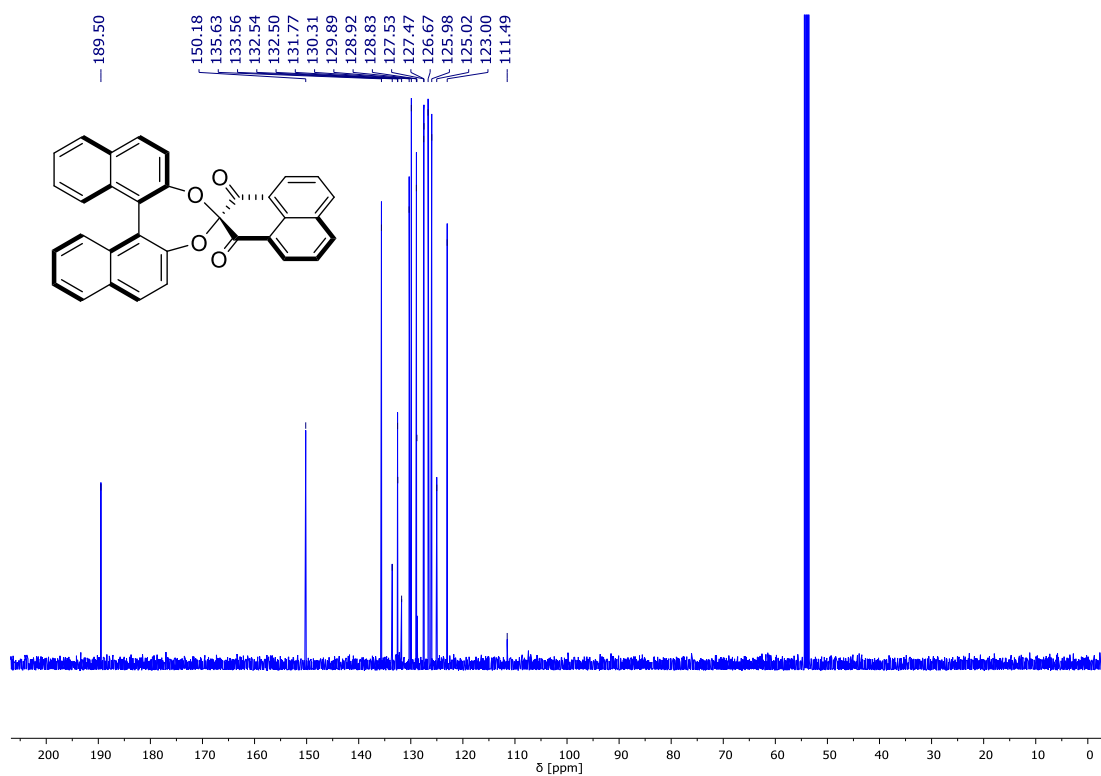

Figure S74: <sup>13</sup>C NMR-spectrum of **32** in CD<sub>2</sub>Cl<sub>2</sub> (101 MHz).

## 7. References

- [1] O. V. Dolomanov, L. J. Bourhis, R. J. Gildea, J. A. K. Howard, H. Puschmann, *J. Appl. Crystallogr.* **2009**, *42*, 339–341.
- [2] G. M. Sheldrick, *Acta Crystallogr. Sect. A Found. Adv.* **2015**, *71*, 3–8.
- [3] G. M. Sheldrick, *Acta Crystallogr. Sect. C Struct. Chem.* **2015**, *71*, 3–8.
- [4] TURBOMOLE V7.3 2018, a development of University of Karlsruhe and Forschungszentrum Karlsruhe GmbH, 1989-2007, TURBOMOLE GmbH, since 2007; available from <http://www.turbomole.com>.
- [5] K. Eichkorn, O. Treutler, H. Öhm, M. Häser, R. Ahlrichs, *Chem. Phys. Lett.* **1995**, *240*, 283–290.
- [6] F. Weigend, *Phys. Chem. Chem. Phys.* **2006**, *8*, 1057.
- [7] S. Grimme, J. Antony, S. Ehrlich, H. Krieg, *J. Chem. Phys.* **2010**, *132*, 154104.
- [8] E. R. Johnson, A. D. Becke, *J. Chem. Phys.* **2006**, *124*, 174104.
- [9] S. Grimme, J. G. Brandenburg, C. Bannwarth, A. Hansen, *J. Chem. Phys.* **2015**, *143*, 054107.
- [10] A. Schäfer, C. Huber, R. Ahlrichs, *J. Chem. Phys.* **1994**, *100*, 5829–5835.
